# Supplementary material
Source: publisher figshare collection journal article supplement (https://gsajournals.figshare.com/ndownloader/files/31954205)
Supplement: Supplementary file 1 [file 31954205]

## Sheet: TransformedBLUEs
Table S2a: Transformed best linear unbiased estimators (BLUEs) for grain carotenoid traits and visually scored kernel color in 10 families of the US maize Nested Association Mapping (NAM) panel. Trait names are as written (α = a, β = b), unless shortened as follows: zeinoxanthin (zeino), total carotenoids (total_carot), kernel color (traitKC), β-cryptoxanthin (b_cryp).
GenoCode	a_carotene	b_carotene	b_cryp	lutein	phytofluene	zeaxanthin	zeino	total_carot	traitKC
Z001E0001	0.95952	0.559609	0.354155	3.77505	0.449302	2.35001	0.66141	5.39783	3.74603
Z001E0002	0.948255	0.539336	0.362267	4.94656	0.308832	2.26058	0.616391	6.59802	3.74419
Z001E0003	0.95799	0.571643	0.477453	4.12275	0.466878	1.93702	0.664479	4.68896	2.20399
Z001E0004	0.962454	0.619197	0.525649	3.37492	0.394419	1.59904	0.76446	3.79571	2.68412
Z001E0005	0.959964	0.53982	0.325323	4.72674	0.468188	2.51104	0.611914	6.35284	3.6653
Z001E0006	0.96529	0.644452	0.467688	4.4004	0.49839	2.04398	0.691857	4.88496	3.3112
Z001E0007	0.940928	0.609769	0.450709	4.27809	0.305043	1.97787	0.694083	6.17601	3.12805
Z001E0008	0.953738	0.543009	0.35759	3.95521	0.531749	2.21746	0.688486	5.41192	3.34831
Z001E0009	0.944303	0.548094	0.338547	4.95022	0.335817	1.92428	0.609157	6.41652	3.36093
Z001E0010	0.94967	0.641975	0.385782	3.71433	0.363153	1.84534	0.692646	5.18301	2.47805
Z001E0011	0.95007	0.604686	0.416342	3.73504	0.476854	1.91156	0.631714	5.31643	3.32564
Z001E0012	0.958328	0.443896	NA	5.67397	NA	2.3206	0.57363	7.2042	3.53341
Z001E0013	0.951014	0.616794	0.442715	4.53755	0.352533	2.05266	0.670124	6.13317	3.13263
Z001E0014	0.948315	0.587983	0.468068	4.87023	0.500036	2.21775	0.729764	6.18499	3.36467
Z001E0015	0.951169	0.53003	0.365969	3.91353	0.481417	2.32057	0.634938	5.6798	3.36401
Z001E0016	0.955045	0.61392	0.463455	4.86843	0.229516	1.73157	0.642868	6.1377	3.12697
Z001E0017	0.950772	0.629382	0.431228	4.77427	0.469108	1.91996	0.595653	6.19633	2.91518
Z001E0018	0.945551	0.559567	NA	3.99337	NA	2.11946	NA	6.26398	3.31943
Z001E0019	0.941273	0.474299	0.414429	4.71211	0.411566	2.47111	0.685135	6.1926	3.55257
Z001E0020	0.946728	0.605877	0.417955	4.94052	0.318388	2.1625	0.726697	6.11935	3.70868
Z001E0021	0.980297	0.590384	0.475538	3.6736	0.375938	2.05859	0.766537	5.22773	2.90113
Z001E0022	0.956174	0.621738	0.343863	3.8385	0.445668	2.04659	0.63643	5.11173	3.75075
Z001E0023	0.937271	0.572539	0.444433	4.55571	0.288535	1.89721	0.636291	5.83804	3.54277
Z001E0024	0.926305	0.497755	0.363239	5.68949	0.233672	2.05398	0.558395	7.19931	3.80119
Z001E0025	0.963267	0.663172	0.522509	3.65558	0.244661	2.0222	0.701704	4.73591	3.12972
Z001E0027	0.959573	0.663302	0.473936	3.58965	0.495093	1.75338	0.711795	4.08841	3.12835
Z001E0028	0.957738	0.644455	0.35694	3.57499	0.43923	1.93652	0.688445	4.32023	3.54373
Z001E0030	0.954885	0.628877	0.378651	4.17682	0.448467	2.11809	0.578057	5.86032	3.79966
Z001E0031	0.946389	0.58865	0.416362	4.69577	0.46231	1.98687	0.590869	5.86186	3.32131
Z001E0032	0.948423	0.562325	0.417339	4.40791	0.471588	2.24513	0.610996	6.26908	3.19937
Z001E0033	0.930702	0.503664	0.393065	4.96054	0.315118	2.36147	0.601676	7.0549	3.39188
Z001E0034	0.938838	0.55085	0.335822	5.6627	0.250352	2.26035	0.559832	7.00547	3.63825
Z001E0036	0.961073	0.61365	0.37505	4.50553	0.230773	2.45172	0.675413	6.08951	NA
Z001E0037	0.947073	0.571515	0.447545	4.64349	0.210276	2.1227	0.608228	6.44061	3.38871
Z001E0038	0.946153	0.59136	0.409588	3.9731	0.402655	2.43892	0.675849	5.87903	3.12546
Z001E0039	0.957819	0.642459	0.400782	5.31724	0.461599	2.20919	0.597931	6.28557	3.13292
Z001E0040	0.935289	0.576821	0.454531	5.21785	0.183064	2.3158	0.700374	6.90321	3.65699
Z001E0041	0.9531	0.62982	0.436375	4.23964	0.497509	1.94417	0.652382	4.98691	2.88718
Z001E0042	0.946151	0.542207	0.405144	4.90788	0.468392	2.17753	0.601312	5.92657	3.12865
Z001E0043	0.961103	0.587156	0.507078	3.20641	NA	1.84874	0.71286	4.73764	NA
Z001E0044	0.95836	0.625921	0.471783	4.6277	0.407207	2.1739	0.694143	5.36425	3.12765
Z001E0045	0.959732	0.550855	0.37979	4.80252	0.498304	2.12474	0.590731	6.12779	3.52779
Z001E0046	0.963284	0.593024	0.435847	3.86992	0.494741	2.07746	0.757038	4.92743	3.56229
Z001E0047	0.942047	0.545497	0.370752	4.46172	NA	1.94081	0.599522	5.72383	3.27275
Z001E0048	0.951292	0.603385	0.460679	3.95808	0.492991	1.79858	0.658449	5.23336	3.12567
Z001E0049	0.958074	0.613802	0.522935	2.89367	0.439482	1.92511	0.765065	3.99169	2.64309
Z001E0050	0.963485	0.56376	0.483366	4.05886	0.446108	2.07293	0.716475	4.83249	3.1312
Z001E0051	0.947773	0.569374	0.418011	4.46553	0.483856	2.16681	0.602204	5.80499	3.0276
Z001E0052	0.960578	0.615113	0.479957	3.66531	0.421523	1.87343	0.740598	4.65989	2.6957
Z001E0053	0.93824	0.515536	0.371865	5.60475	0.303196	2.10211	0.577414	6.68758	3.38231
Z001E0054	0.948804	0.582819	0.434002	3.94356	0.440003	1.87612	0.63935	4.88066	3.24119
Z001E0055	0.956695	0.606042	0.407068	5.70934	0.354311	2.21979	0.629933	6.60535	3.36923
Z001E0056	0.961065	0.618566	0.534511	3.88901	0.458578	1.65342	0.655279	4.81012	3.26143
Z001E0057	0.95947	0.622168	0.471662	3.32589	0.384142	1.94415	0.747518	4.20739	2.66868
Z001E0058	0.954149	0.591854	0.423244	4.42013	0.367678	2.01286	0.659041	5.12152	3.12702
Z001E0059	0.943153	0.608489	0.334126	5.51763	0.489557	2.1981	0.561072	6.81812	NA
Z001E0060	0.949238	0.596983	0.375309	5.11583	NA	2.17369	0.495667	6.94563	3.63396
Z001E0061	0.958552	0.625482	0.319464	5.06955	0.469929	2.33955	0.633819	6.33627	3.12133
Z001E0062	0.944108	0.543871	0.456296	5.91608	0.283681	2.14704	0.687439	6.90579	3.0764
Z001E0063	0.950022	0.600275	0.419433	5.68344	NA	2.13318	0.626612	6.97605	3.68653
Z001E0064	0.948299	0.572825	0.474746	4.97133	0.250505	2.19496	0.685128	6.33729	3.74411
Z001E0065	0.930841	0.518501	0.296014	4.04982	0.374977	2.18347	0.569424	6.17248	3.12304
Z001E0067	0.958332	0.604254	0.501961	3.59408	0.507786	1.73247	0.696317	4.60282	2.79743
Z001E0068	0.951916	0.606866	0.426868	4.22591	0.399845	1.93242	0.618958	5.30404	3.33478
Z001E0069	0.954859	0.607638	0.428433	4.20483	0.235271	2.13613	0.650706	5.40599	3.67911
Z001E0070	0.956674	0.584257	0.401541	5.13329	NA	1.95278	0.606431	6.29718	3.19687
Z001E0071	0.964426	0.562464	0.474605	3.84283	0.439275	2.10976	0.659806	5.26269	3.44534
Z001E0072	0.960742	0.523575	0.388625	4.28879	0.33363	2.36566	0.602276	6.29502	3.63533
Z001E0073	0.946927	0.594505	0.412096	4.72405	0.312259	1.87118	0.688023	5.80612	3.26654
Z001E0074	0.950523	0.623761	0.442328	2.81433	NA	1.82588	0.729072	4.37417	3.19035
Z001E0075	0.960843	0.615103	0.465137	2.93078	0.388995	2.11551	0.824912	4.27837	2.94724
Z001E0077	0.930613	0.530955	0.335174	4.82924	0.329203	2.18666	0.581886	6.86237	3.53238
Z001E0078	0.955813	0.600916	0.421293	3.11881	0.464981	1.89939	0.662984	4.55966	2.82577
Z001E0079	0.96352	0.605068	0.502834	2.94356	0.360133	1.90836	0.751094	3.79927	3.13767
Z001E0080	0.94417	0.444542	0.321979	4.31356	0.425318	2.23175	0.667594	6.19377	3.22461
Z001E0081	0.963406	0.5559	0.409799	3.66454	0.240683	2.12467	0.686502	5.18024	3.15162
Z001E0082	0.966634	0.630906	0.408651	4.15926	0.380903	2.00561	0.655827	4.98765	3.11282
Z001E0083	0.949019	0.527853	0.368113	5.55754	NA	2.10121	0.615326	6.33346	3.68077
Z001E0084	0.961978	0.646412	0.515693	3.35751	0.470779	1.05097	0.6886	3.8261	2.68459
Z001E0085	0.929883	0.569135	0.420174	5.44924	0.27596	1.83115	0.668003	6.90329	3.34844
Z001E0086	0.973882	0.622628	0.484962	2.00715	NA	1.97954	0.85556	3.53372	3.23596
Z001E0087	0.946139	0.584433	0.490002	4.27286	0.259088	1.76358	0.709518	5.42781	3.23081
Z001E0088	0.942707	0.538897	0.37835	5.3804	0.388589	1.62786	0.550306	6.25101	3.24904
Z001E0089	0.952138	0.638839	0.473334	4.91609	0.433572	2.01645	0.710533	5.62967	2.35519
Z001E0090	0.950371	0.575681	0.488682	5.31966	0.385494	2.05584	0.723557	6.51199	3.64097
Z001E0091	0.933191	0.556482	0.396135	4.26047	0.36646	1.81623	0.613936	5.81814	3.49037
Z001E0092	0.961722	0.616887	0.442781	3.94474	0.565499	2.16996	0.715412	4.93301	3.54736
Z001E0093	0.941598	0.520988	0.438759	5.07017	0.22374	2.01613	0.617377	6.65125	3.3887
Z001E0094	0.945643	0.557913	0.439021	4.50848	NA	1.96445	0.557489	6.04045	3.3358
Z001E0095	0.958715	0.651566	0.506623	4.24482	0.35459	1.71817	0.715982	4.77868	2.6795
Z001E0096	0.946477	0.548958	0.373584	4.57085	0.333953	1.95191	0.571862	5.92822	3.05115
Z001E0097	0.945562	0.49402	0.41509	5.23747	0.391366	2.04725	0.59809	6.61244	3.13914
Z001E0098	0.953027	0.592583	0.441285	4.97991	0.21227	2.21977	0.62694	6.28019	2.68147
Z001E0099	0.960452	0.58997	0.445202	3.72691	0.480373	2.15511	0.685189	5.03594	3.21469
Z001E0100	0.95307	0.613017	0.425585	4.49121	0.213878	2.03605	0.537312	6.07425	3.23033
Z001E0101	0.958188	0.652353	0.431073	3.84616	NA	1.9882	0.61515	5.12457	3.48321
Z001E0102	0.942193	0.590527	0.479674	4.78714	NA	2.06196	0.677759	5.81164	2.62293
Z001E0103	0.950833	0.563303	0.421468	4.26887	0.2339	2.15239	0.708811	5.82662	3.11446
Z001E0104	0.956407	0.602935	0.390548	4.23697	0.29519	2.24914	0.626501	5.84242	3.54341
Z001E0105	0.947437	0.620781	0.457763	3.7781	NA	2.02664	0.574507	5.5653	3.12493
Z001E0106	0.943649	0.605729	0.359589	4.44948	0.245328	2.19394	0.614388	5.63855	NA
Z001E0107	0.959817	0.578236	0.54086	4.00598	0.267119	1.68834	0.730421	4.35577	3.33663
Z001E0108	0.942081	0.530733	0.557675	4.09381	0.486197	1.96668	0.635668	5.63958	3.541
Z001E0109	0.960576	0.620783	0.445709	3.05209	0.452988	1.89479	0.687583	4.56624	2.81497
Z001E0110	0.957659	0.57052	0.445085	3.81604	0.461602	2.11022	0.664231	5.10997	3.1216
Z001E0111	0.954278	0.592906	0.575518	4.55542	NA	1.90848	0.751149	5.90033	2.98309
Z001E0112	0.956965	0.632194	0.512375	3.81378	0.198834	2.02007	0.687231	5.02196	3.20756
Z001E0113	0.959173	0.636923	0.549074	3.819	0.298193	1.71042	0.748915	3.80319	2.68168
Z001E0115	0.957699	0.586335	0.463261	3.95296	0.400269	1.70189	0.62221	4.87999	3.25898
Z001E0116	0.961888	0.583933	0.558086	4.25625	0.189855	1.94497	0.746362	5.73637	3.41045
Z001E0117	0.956146	0.61792	0.5326	2.87192	0.367452	2.14513	0.807507	4.60149	2.97228
Z001E0118	0.95518	0.618247	0.508299	3.40185	0.20057	1.93824	0.73528	4.62111	3.20526
Z001E0119	0.93258	0.565016	0.404426	4.99827	0.451902	2.00349	0.586083	6.42343	3.2202
Z001E0120	0.96015	0.589423	0.489813	4.76689	0.393724	1.82854	0.650353	5.39269	3.3094
Z001E0121	0.960081	0.549459	0.477691	5.0936	0.411911	2.03922	0.760192	5.92493	3.26708
Z001E0122	0.947232	0.50177	0.421774	4.21767	NA	1.89399	0.653912	5.14498	3.49557
Z001E0123	0.940701	0.601091	0.434421	4.36619	0.2878	2.01993	0.674034	5.92935	3.49769
Z001E0124	0.950152	0.612533	0.503099	4.73409	0.367958	2.08164	0.71121	5.57067	3.51342
Z001E0125	0.947793	0.57736	0.310181	5.11991	0.399071	2.2507	0.563177	6.62335	NA
Z001E0126	0.954968	0.575467	0.407804	4.06162	0.355137	2.25948	0.684224	5.65486	3.54237
Z001E0127	0.944347	0.512148	0.358602	4.77489	0.332736	2.34592	0.619439	6.58195	3.32582
Z001E0128	0.964016	0.567689	0.372953	4.56348	0.232162	2.17525	0.512073	6.26099	3.49609
Z001E0129	0.955013	0.57396	0.407294	4.90438	0.294891	2.27173	0.63991	5.82711	3.38877
Z001E0130	0.956068	0.586001	0.335371	4.28299	0.405322	2.30514	0.716502	5.59273	3.51223
Z001E0131	0.942677	0.558948	0.357112	4.34353	0.373517	2.01724	0.543982	5.8057	3.41553
Z001E0132	0.97173	0.64031	0.488885	3.00178	0.265213	1.89731	0.708364	3.93937	2.50522
Z001E0133	0.960591	0.620456	0.429776	3.79077	0.223993	2.08387	0.740025	4.94046	2.89334
Z001E0134	0.959582	0.577039	0.477996	3.44023	0.47365	1.88182	0.681883	4.27013	2.78471
Z001E0135	0.939797	0.544281	0.43076	5.58658	0.461309	1.97171	0.575456	6.7623	3.20334
Z001E0136	0.949818	0.391319	0.279327	5.1037	0.417165	2.49146	0.658274	6.98345	3.54588
Z001E0137	0.969849	0.540955	NA	4.81235	NA	2.15511	0.644761	5.69923	3.4515
Z001E0138	0.957127	0.576873	0.489335	4.2969	0.450379	1.99296	0.704114	5.00953	2.90869
Z001E0139	0.953274	0.60929	0.390926	3.56677	0.454051	1.8805	0.601867	4.94409	3.25313
Z001E0140	0.960404	0.460685	0.278225	4.06792	0.462561	2.55717	0.593594	6.56788	3.79951
Z001E0141	0.956596	0.618953	0.4258	4.1137	0.51018	1.83064	0.648631	5.10157	0.628162
Z001E0143	0.952555	0.562134	0.540973	4.4394	0.235918	2.0731	0.7336	5.7311	3.12618
Z001E0144	0.943451	0.592866	0.409506	4.8487	0.412038	1.95034	0.600225	5.91142	3.37605
Z001E0145	0.950095	0.537844	0.37069	3.86499	0.492278	2.07545	0.657976	5.08319	3.39917
Z001E0146	0.957026	0.565493	0.392367	3.9739	0.279703	2.32882	0.61115	5.73386	3.10662
Z001E0147	0.947287	0.562854	0.469768	3.3686	0.28105	2.14891	0.660627	5.52934	3.7967
Z001E0148	0.95069	0.605788	0.411538	4.9743	0.286475	2.19255	0.622912	5.97842	3.24257
Z001E0149	0.958979	0.573134	0.399001	3.51508	0.464739	2.03865	0.699849	4.75329	3.05311
Z001E0150	0.967566	0.656617	0.490889	4.63799	0.469921	2.23227	0.667134	5.31257	2.68326
Z001E0152	0.964247	0.622017	0.509221	3.60385	0.350499	1.67679	0.71718	4.37545	2.88334
Z001E0153	0.949639	0.604439	0.355013	4.69753	0.51847	2.17823	0.579201	5.63404	NA
Z001E0154	0.939309	0.589705	0.307544	4.93026	0.431815	2.50248	0.617673	6.74281	3.54737
Z001E0156	0.947358	0.511965	0.397538	4.06124	0.470236	2.18973	0.656004	5.72343	3.63955
Z001E0157	0.953603	0.579465	0.422826	4.04159	0.507965	1.76843	0.703724	5.0701	NA
Z001E0158	0.934933	0.539764	0.496961	5.65842	NA	1.88111	0.560719	6.45205	3.72477
Z001E0159	0.966132	0.623751	0.391866	5.53473	0.416142	2.2677	0.623958	6.19995	3.54273
Z001E0160	0.938935	0.600143	0.383045	4.35664	0.457075	1.8947	0.639573	6.16306	3.54855
Z001E0161	0.935483	0.438031	0.392691	5.97895	0.39322	2.35317	0.5689	7.07997	NA
Z001E0162	0.963346	0.637734	0.538236	3.08626	0.483996	1.82226	0.768037	3.90237	2.49205
Z001E0163	0.953072	0.607382	0.433245	4.47199	0.313097	2.2553	0.673096	5.65402	3.29686
Z001E0164	0.949317	0.550937	0.454719	5.53441	NA	2.14106	0.656452	6.5176	3.54661
Z001E0165	0.940388	0.509457	0.365493	5.30756	0.225315	2.35207	0.56011	7.12796	3.76216
Z001E0166	0.958226	0.545755	0.472337	4.37103	0.30616	2.15992	0.668113	5.50661	3.0346
Z001E0167	0.965425	0.617228	0.522757	3.12816	0.345346	1.99416	0.778308	4.23887	3.239
Z001E0168	0.96159	0.576516	0.484818	3.19264	NA	2.01884	0.77118	4.26528	2.81414
Z001E0169	0.960423	0.610652	0.366091	4.51342	0.44643	2.13113	0.523373	6.06017	3.54539
Z001E0170	0.95956	0.576089	0.491621	4.4023	0.47906	2.18046	0.652975	5.62211	3.05497
Z001E0171	0.959456	0.604698	0.540936	2.92346	0.210816	1.56974	0.786394	3.40579	NA
Z001E0172	0.961853	0.638131	0.465349	3.51864	0.493767	2.07625	0.724054	4.49411	2.93247
Z001E0173	0.957064	0.541498	0.449775	4.23172	0.472129	2.13107	0.726252	5.2352	3.09088
Z001E0174	0.955882	0.544805	0.366474	4.6454	0.458607	2.16113	0.636391	5.72428	3.36981
Z001E0175	0.955319	0.576794	0.524851	3.53158	0.310573	1.86364	0.744773	4.16604	3.12879
Z001E0176	0.964005	0.545896	0.351487	2.98662	0.373995	2.31731	0.731361	4.77671	3.56964
Z001E0177	0.946019	0.578252	0.562868	4.6772	0.377721	2.14733	0.736096	6.25235	3.35574
Z001E0178	0.944158	0.539078	0.389535	3.89875	0.31074	2.01997	0.588905	5.37617	3.04832
Z001E0181	0.951593	0.576694	0.419858	5.20384	0.317456	2.11346	0.623058	6.39322	3.316
Z001E0182	0.941758	0.544202	0.458938	5.69434	0.285955	2.14608	0.691324	6.64702	3.28112
Z001E0183	0.974167	0.493094	NA	6.12505	NA	2.54462	NA	7.84031	3.68996
Z001E0184	0.955294	0.512845	0.413406	5.92191	0.397765	2.25379	0.584377	7.00894	3.4662
Z001E0185	0.964718	0.653775	0.430149	4.44307	0.261847	2.01943	0.546929	5.33509	2.91407
Z001E0186	0.962483	0.564812	0.431637	3.45438	0.501572	1.85574	0.791135	4.67018	3.34166
Z001E0187	0.962293	0.529571	0.39245	3.99115	0.463834	1.97263	0.675785	5.24475	3.35314
Z001E0188	0.951121	0.477275	0.39402	3.46944	0.453759	2.20044	0.752628	4.95783	3.33705
Z001E0189	0.932267	0.494311	0.295727	4.0123	0.392303	2.12863	0.567432	6.22243	3.12979
Z001E0190	0.946313	0.537741	0.439636	3.93001	0.361638	1.92294	0.624389	4.96214	2.68478
Z001E0191	0.954671	0.665213	0.420803	5.35768	0.438506	2.04166	0.633741	5.97176	3.17342
Z001E0192	0.959377	0.572632	0.378397	2.96437	0.470261	2.13471	0.723825	4.68916	3.19601
Z001E0193	0.956446	0.584685	0.507928	3.41332	0.461181	2.02462	0.670146	4.75223	3.61384
Z001E0194	0.954273	0.64108	0.482158	4.78259	0.405795	2.14579	0.65022	5.5322	3.29888
Z001E0195	0.954166	0.57572	0.421801	5.20953	NA	2.32999	0.627509	6.68348	3.4041
Z001E0196	0.959327	0.593615	0.488122	3.9633	0.49682	1.89373	0.654091	4.79538	2.98168
Z001E0197	0.960296	0.624034	0.426419	4.27796	0.38567	2.00166	0.642864	5.45907	2.78843
Z001E0198	0.943912	0.542572	0.347422	3.70639	0.369192	1.89848	0.587471	5.43588	3.3353
Z001E0199	0.933711	0.550103	0.357919	5.00488	0.475498	2.04862	0.67155	6.42183	3.56373
Z001E0200	0.935714	0.552421	0.41787	4.6689	0.332435	1.82639	0.665392	6.0645	3.57289
Z001E0215	0.94226	0.588431	0.428772	4.85441	0.475719	1.95096	0.608284	5.77742	3.08602
Z001E0229	0.945443	0.475596	0.268791	4.75996	0.254474	2.51778	0.53307	7.11587	NA
Z003E0001	0.919639	0.560956	0.375852	6.20854	0.504621	2.24284	0.574808	7.31311	3.86323
Z003E0002	NA	0.439893	0.381068	7.93703	0.302419	2.20177	0.635864	8.36327	3.73261
Z003E0003	0.932493	0.463015	0.402158	5.16486	0.426261	2.2439	0.668286	6.35884	3.70526
Z003E0004	0.950017	0.525742	0.342202	5.42593	0.480936	2.02422	0.630662	6.09714	3.79788
Z003E0005	0.946873	0.438716	0.185509	3.84058	0.221333	2.96695	0.687624	7.6029	NA
Z003E0006	0.931765	0.487391	0.382383	6.83365	0.370722	2.31239	0.677286	7.58658	3.68795
Z003E0007	0.94415	0.550297	0.41835	4.51435	0.352352	1.99689	0.677076	5.6808	3.53501
Z003E0008	0.940907	0.417045	0.195432	3.95914	0.461924	3.06322	0.728897	7.7989	5.11889
Z003E0009	0.931378	0.474936	0.315758	5.98235	0.411068	2.55475	0.538721	7.76718	4.30459
Z003E0010	0.928467	0.425158	0.303659	6.36842	0.32745	2.44279	0.441008	8.60131	4.01617
Z003E0011	0.926903	0.490741	0.266991	5.35802	0.293263	2.22762	0.51327	7.04251	4.12546
Z003E0012	0.949339	0.37765	0.172082	2.12421	0.320736	3.27461	0.73901	7.89036	5.02292
Z003E0013	0.929589	0.456868	0.370868	4.73229	0.535257	2.10836	0.585997	6.27108	3.53201
Z003E0014	0.924631	0.504068	0.367468	5.03424	0.443229	2.05642	0.572512	6.57983	3.86649
Z003E0015	0.937871	0.427525	0.247441	3.85341	0.376105	2.80642	0.6693	7.12754	4.38305
Z003E0016	0.951576	0.469153	0.189536	3.67005	0.410427	2.94856	0.666981	6.99389	NA
Z003E0017	0.929272	0.504256	0.429697	4.99249	0.409556	2.07624	0.611723	6.46915	3.78601
Z003E0019	0.931219	0.5439	0.259748	2.64481	0.444859	2.53877	0.691697	5.6656	4.48297
Z003E0020	0.930283	0.477787	0.282613	4.35615	0.390227	2.35963	0.557531	6.59218	3.61817
Z003E0021	0.930778	0.530986	0.315588	4.53027	0.417541	2.07102	0.534886	6.30705	3.60161
Z003E0022	NA	0.595634	0.294242	5.73673	0.37118	2.52234	0.508523	8.33711	4.50746
Z003E0023	0.928065	0.454663	0.297396	5.27056	0.389398	2.35255	0.475351	7.64948	3.82615
Z003E0024	0.932539	0.510659	0.265579	5.67121	0.32085	2.8348	0.68365	7.99945	4.82632
Z003E0026	0.9364	0.410651	NA	5.27505	0.267901	2.98482	0.651676	8.47256	4.50551
Z003E0027	NA	0.387031	0.234903	5.76035	0.270737	2.50269	0.493405	8.33679	3.73528
Z003E0029	0.919621	0.481547	0.356256	6.3113	0.417746	2.17314	0.574971	7.48565	3.88067
Z003E0030	0.924342	0.487468	0.391549	6.08792	0.425673	2.21207	0.578918	7.26056	3.91309
Z003E0031	0.923787	0.447485	0.262282	6.32572	0.337601	2.25631	0.460547	8.42308	3.75193
Z003E0032	0.949412	0.38573	0.201437	3.55141	0.325675	2.84963	0.726375	7.14768	3.92066
Z003E0033	0.937959	0.49531	0.318568	5.03194	0.464069	2.43643	0.616654	6.70331	3.86296
Z003E0034	0.951916	0.509869	0.224023	3.19714	0.417594	2.78225	0.719945	6.04145	3.86016
Z003E0035	0.971041	0.34385	0.155049	3.10498	0.351966	2.99904	0.726743	7.72265	5.06102
Z003E0036	0.924615	0.442752	0.331252	5.26376	0.372139	2.42839	0.582483	6.8724	4.12844
Z003E0037	0.938304	0.337358	0.224286	4.28536	0.342565	2.77184	0.63454	7.35099	4.49809
Z003E0038	0.951253	0.53971	0.324792	5.83122	0.453422	2.32979	0.639722	6.73515	4.21596
Z003E0039	0.925333	0.460924	0.302395	5.44949	0.355601	2.41785	0.562355	7.28819	3.88228
Z003E0040	0.936495	0.541265	0.420645	4.56301	0.518197	1.7392	0.528143	5.99766	3.19854
Z003E0041	0.930604	0.603899	0.334943	5.68167	0.321138	2.49299	0.615227	7.48732	4.12961
Z003E0042	0.919849	0.576429	0.38705	6.59978	0.406288	1.91021	0.591686	7.55231	3.75675
Z003E0044	0.949039	0.405041	0.208427	3.40421	0.540315	3.12553	0.689125	7.40375	NA
Z003E0045	0.932674	0.453611	0.289551	NA	0.398455	2.62267	NA	9.79764	3.9224
Z003E0046	0.924011	0.490483	0.340441	5.26039	0.4217	2.01024	0.561299	6.91928	3.72244
Z003E0047	0.922705	0.502492	0.267542	6.21939	0.320241	2.75408	0.449075	9.12475	4.15447
Z003E0048	0.944641	0.393779	0.278683	2.99667	0.423506	2.78417	0.721535	6.25118	4.00185
Z003E0049	NA	0.437332	0.354669	6.74361	0.294389	1.98942	0.684365	7.25371	4.12099
Z003E0050	0.939855	0.471627	0.263207	5.56953	0.383738	2.45748	0.477785	7.6599	4.00772
Z003E0051	NA	0.444098	0.338814	5.92151	0.43065	2.53763	0.53042	8.14652	4.12433
Z003E0052	0.928786	0.420565	0.229283	6.99055	0.314305	2.65747	0.511291	8.65684	4.15478
Z003E0053	0.954939	0.487396	0.260461	3.96558	0.41623	2.91825	0.71828	7.01347	NA
Z003E0054	0.926106	0.484693	0.270762	7.75666	0.3389	2.32862	0.5458	8.4774	3.9047
Z003E0055	0.929569	0.626039	0.341364	4.45972	0.325349	2.35586	0.529936	6.86208	4.12566
Z003E0056	0.945208	0.369421	0.266369	3.75656	0.485472	3.19834	0.752219	7.58361	4.94998
Z003E0057	0.938419	0.494664	0.416681	5.18193	0.425873	2.19295	0.645247	6.34264	3.95842
Z003E0058	0.932635	0.575982	0.352762	7.56691	0.352339	2.29709	0.52673	8.15731	4.45708
Z003E0059	0.947547	0.436194	0.167125	3.07397	0.360711	3.4761	0.711937	8.49336	4.52206
Z003E0061	0.945792	0.335623	0.210601	4.67864	0.285798	2.98205	0.713456	8.09606	4.50303
Z003E0063	0.925533	0.41431	0.304946	7.24267	0.345577	2.44999	0.52314	8.73202	3.93397
Z003E0064	NA	0.480711	0.371801	7.69719	0.328961	2.03413	0.631456	8.07979	4.12406
Z003E0065	NA	NA	0.262912	5.48627	0.301707	2.64731	0.506625	8.18041	NA
Z003E0066	0.939137	0.408512	0.280266	5.55018	0.411252	2.83664	0.552972	8.02731	4.0592
Z003E0067	0.924917	0.479353	0.363666	5.38152	0.46098	2.18114	0.538331	7.18033	3.62505
Z003E0068	NA	0.379639	0.290772	7.12836	0.314239	2.53329	0.435689	9.11629	4.12419
Z003E0069	0.934606	0.508141	0.418577	5.67082	0.472628	2.0879	0.619246	6.52514	3.70223
Z003E0070	NA	0.624653	0.331747	5.97985	0.408208	2.42455	0.45185	8.43182	3.73632
Z003E0071	0.936656	NA	0.214827	2.87771	0.374429	3.22206	0.735474	7.67853	NA
Z003E0072	0.955731	0.403245	0.251762	1.98792	0.30856	3.00274	0.750976	6.40983	4.2344
Z003E0073	0.92609	0.433594	0.230488	5.58423	0.291081	2.57254	0.462737	8.04375	4.12894
Z003E0074	0.924281	0.471902	0.324491	8.22777	0.327569	2.66875	0.587088	9.28524	4.40748
Z003E0075	0.964359	0.681334	0.373637	7.72559	0.535521	2.76317	0.583698	8.70929	3.93415
Z003E0076	0.955719	0.495299	0.342575	4.58157	0.511117	1.97849	0.66139	6.04717	3.53876
Z003E0077	0.94214	0.421973	0.271783	3.41233	0.396937	2.71841	0.706015	6.53344	NA
Z003E0078	NA	0.453996	0.341607	NA	0.355667	2.60308	0.568937	9.62293	4.12814
Z003E0079	0.931668	0.534872	0.352962	7.82019	0.287988	2.5182	0.66051	8.41468	3.76851
Z003E0080	0.937581	0.389639	0.211681	3.3222	0.33566	3.27424	0.660489	7.96952	5.03659
Z003E0081	0.942548	0.438353	0.212866	4.16908	0.363714	3.08753	0.676788	7.77036	5.02589
Z003E0082	0.930649	0.51509	0.327901	6.40575	0.404598	2.49685	0.633064	7.81992	4.12643
Z003E0083	0.944922	NA	0.204668	4.22911	0.456358	3.05778	0.752533	7.67941	NA
Z003E0084	0.929438	0.472211	0.347068	5.28934	0.484675	2.27341	0.6621	6.62556	3.94238
Z003E0085	0.946747	0.367985	0.167109	4.21949	0.299195	3.35372	0.69673	8.78825	NA
Z003E0086	0.922703	0.495451	0.36269	8.38148	0.386188	2.67704	0.583389	9.21785	3.94147
Z003E0087	NA	0.389779	0.262858	7.25849	0.263464	2.35703	0.635123	8.76741	4.12423
Z003E0088	0.928947	0.520534	0.381058	6.21613	0.49703	1.95679	0.601007	6.80077	3.47575
Z003E0089	0.937197	0.380242	0.250634	4.31516	0.291914	3.32378	0.697898	8.72994	NA
Z003E0091	0.944118	0.379197	0.274769	5.02858	0.41186	2.79999	0.659508	7.58029	3.85325
Z003E0092	0.953978	0.432715	0.184986	4.63123	0.291427	3.1791	0.614165	8.32212	4.65519
Z003E0093	0.961368	0.378187	0.166858	4.32122	0.305211	3.37484	0.658178	8.99242	5.29825
Z003E0094	0.951872	0.572291	0.333617	5.67394	0.37445	2.1639	0.63427	6.54885	3.89065
Z003E0095	0.927478	0.485123	0.291244	4.81777	0.449973	2.59144	0.478721	7.5118	3.71419
Z003E0097	0.954209	0.472727	0.327716	2.20387	0.445379	2.75227	0.747978	5.31196	4.00043
Z003E0098	0.927067	0.45754	0.334045	5.11525	0.354658	2.11366	0.627785	6.43563	3.74254
Z003E0100	0.936189	0.368056	0.186072	5.16579	0.278387	3.008	0.668761	8.36842	4.74393
Z003E0101	0.959028	0.428119	0.200584	3.63212	0.443877	3.24814	0.741978	7.56931	NA
Z003E0102	NA	0.351055	0.282339	5.02413	0.445344	2.50333	0.494621	7.72125	4.31231
Z003E0103	0.927487	0.497453	0.275653	5.52631	0.435978	2.38173	0.552338	7.5797	3.95133
Z003E0104	0.952949	0.401357	0.228116	3.63952	0.407916	3.34647	0.702636	7.99073	4.52554
Z003E0105	0.945395	0.369261	0.146814	2.77045	0.272792	3.53502	0.710815	8.80484	5.46431
Z003E0106	0.941835	NA	0.21314	3.52951	0.300593	3.23867	0.715027	7.86197	4.49664
Z003E0108	0.945033	0.37627	0.171868	2.5566	0.343562	2.84758	0.735424	6.56756	NA
Z003E0109	0.926815	0.480126	0.333913	4.9738	0.511031	2.42399	0.513053	7.52266	4.01001
Z003E0110	0.964569	0.617569	0.253028	2.85811	0.52868	2.73562	0.734034	5.63674	4.12222
Z003E0111	0.956486	0.450892	0.255478	1.97777	0.514809	2.66732	0.742812	5.64379	3.74646
Z003E0112	0.929855	0.431019	0.174097	3.12919	0.338841	3.14054	0.690416	7.82197	5.22588
Z003E0113	0.923992	0.494759	0.339704	6.08243	0.26493	2.37698	0.644588	7.8157	3.83424
Z003E0114	0.931183	0.467923	0.315137	5.00329	0.513459	2.15421	0.569598	6.28539	3.59983
Z003E0115	0.939219	0.517741	0.389118	6.10167	0.437521	2.23315	0.703131	6.75239	3.73508
Z003E0116	0.966709	0.451408	NA	1.02323	0.446167	2.61881	0.778964	5.24968	3.85281
Z003E0117	0.958634	0.404003	0.229572	2.33998	0.4508	2.86508	0.753054	6.11153	3.94663
Z003E0118	0.94945	0.460469	0.355571	2.09792	0.542636	2.47523	0.754411	5.03578	4.12654
Z003E0119	0.94664	0.557527	0.373127	4.65493	0.261702	2.0179	0.574707	6.01643	3.70531
Z003E0120	0.939453	0.55761	0.471893	4.99834	0.554301	1.92559	0.666584	5.79924	3.32857
Z003E0121	0.944881	0.593634	0.483331	4.92901	0.483916	1.8765	0.705501	5.62664	3.68835
Z003E0122	0.950622	0.431684	0.19107	2.55327	0.427557	2.84576	0.711719	6.77725	4.61954
Z003E0123	0.952988	0.425122	0.224903	3.13094	0.301609	2.67637	0.688136	6.51281	3.90599
Z003E0124	0.940271	0.503901	0.381985	5.5865	0.417606	2.10467	0.565617	6.77197	3.84385
Z003E0126	0.959205	0.498695	0.357634	2.7067	0.562176	2.13184	0.751849	4.72026	3.33694
Z003E0127	0.937688	0.464217	0.301906	6.69808	0.362158	2.70053	0.630959	8.16706	4.42612
Z003E0128	0.946314	0.462539	0.240359	5.28564	0.333905	2.52681	0.552321	7.49735	3.74693
Z003E0129	0.943219	0.425132	0.235326	2.48779	0.429299	2.84023	0.734479	6.05962	4.35412
Z003E0130	0.940771	0.513628	0.366341	5.91099	0.456004	2.12858	0.643278	6.59315	3.95485
Z003E0131	0.913176	0.442635	0.290659	7.92491	0.408248	2.61858	0.556815	9.26887	4.02535
Z003E0132	0.953944	0.352658	0.170486	3.10603	0.316678	3.2524	0.652029	8.06165	4.66534
Z003E0133	0.945708	0.55616	0.440567	4.81353	0.494143	2.19973	0.666741	5.91839	3.64209
Z003E0134	0.946083	0.430321	0.242397	3.26033	0.429438	2.86641	0.690878	6.61432	4.19796
Z003E0135	NA	0.380448	0.293506	5.85514	0.38199	2.55705	0.460242	8.52166	4.31946
Z003E0136	0.926588	0.431828	0.306036	8.20288	0.328892	2.29962	0.569481	8.9255	3.92771
Z003E0137	0.951135	0.524048	0.271933	3.02378	0.432235	2.73373	0.737896	5.7088	3.88247
Z003E0138	0.920218	0.443398	0.310238	4.61222	0.437373	2.20372	0.542669	6.64257	3.56984
Z003E0139	0.9284	0.434498	0.227633	4.45224	0.26631	2.8819	0.722603	7.46444	3.7634
Z003E0140	0.940122	0.548369	0.362717	5.67464	0.546815	2.3551	0.55879	7.15011	3.84072
Z003E0142	0.954272	0.429319	0.235849	1.50356	0.3762	2.87273	0.734737	6.28448	4.36682
Z003E0143	0.942809	0.540133	0.393116	5.07139	0.36111	2.09162	0.655309	6.20309	3.70471
Z003E0144	NA	0.37949	0.246444	6.56993	0.300995	2.7029	0.507795	8.56478	4.68035
Z003E0145	0.926552	0.429768	0.279329	7.05402	0.395538	2.31875	NA	8.30999	3.91569
Z003E0147	0.927453	0.381397	0.263234	6.49216	0.337707	2.5647	0.484929	8.57511	4.16827
Z003E0149	0.945054	0.55882	0.428812	6.35386	0.506075	2.10588	0.693165	7.11534	3.79247
Z003E0150	0.939404	0.34765	0.180693	3.62631	0.362107	3.04143	0.684078	7.97735	4.5211
Z003E0152	0.924653	0.499853	0.374988	5.46436	0.376502	2.16217	0.593682	6.83191	3.84427
Z003E0153	0.922872	0.444469	0.324309	5.58868	0.437718	2.36763	0.501918	7.53396	3.63349
Z003E0154	0.949967	0.479639	0.273534	5.99885	0.233273	2.9385	0.593693	8.46021	4.07802
Z003E0155	0.95438	0.585124	0.415515	4.75748	0.399345	1.93083	0.598461	5.77568	3.75011
Z003E0156	0.931113	0.343835	0.253085	4.2824	0.33201	2.83036	0.620013	7.68442	4.49914
Z003E0157	0.923674	NA	0.20387	5.28589	0.256967	3.28358	0.702116	8.89006	NA
Z003E0158	0.955568	NA	0.213171	3.73496	0.363439	3.40456	0.666607	8.69328	NA
Z003E0159	0.920183	0.422462	0.299514	6.92762	0.256848	2.60235	0.511821	8.78984	4.30459
Z003E0160	0.957326	0.616888	0.330453	6.25609	0.330095	2.44572	0.54524	7.85574	3.7421
Z003E0161	0.95321	0.411416	0.247263	3.00843	0.368818	2.8472	0.743747	6.44411	4.12594
Z003E0163	0.943018	0.519716	0.371838	2.73875	0.521421	2.63103	0.7046	5.82062	4.06176
Z003E0164	0.934068	NA	NA	4.28193	NA	3.3998	0.666877	10.1112	NA
Z003E0165	0.925883	0.447635	0.298688	7.30221	0.374593	2.69607	0.588286	8.81245	3.9564
Z003E0166	0.930299	0.479326	0.415544	3.56312	0.432937	1.6667	0.677871	5.03861	2.89845
Z003E0167	0.925581	0.458297	0.331456	4.15556	0.391549	2.26759	0.515308	6.74689	3.73805
Z003E0168	0.930434	0.549127	0.36812	7.31158	0.311177	2.21108	0.595103	8.06629	3.99584
Z003E0169	0.941283	0.447407	0.296697	2.69432	0.462953	2.66877	0.708398	5.9343	4.00951
Z003E0171	0.92528	0.507368	0.413448	5.58139	0.532984	2.28026	0.676193	6.5548	3.79114
Z003E0172	0.954942	0.366012	NA	0.409707	0.408819	2.89979	0.755866	6.00213	4.21136
Z003E0173	0.947393	0.493769	0.350097	6.48443	0.436276	2.47752	0.688017	7.36615	4.01562
Z003E0174	0.951149	0.359291	0.172151	3.31823	0.490497	3.01535	0.685772	7.55019	NA
Z003E0175	0.940826	0.594323	0.332081	5.05995	0.518678	2.24312	0.614451	6.50188	3.5451
Z003E0176	0.956368	0.432786	0.270106	2.20894	0.441928	2.9017	0.735452	6.07219	3.95755
Z003E0177	NA	0.430379	0.338074	6.76574	0.336594	2.38129	0.673527	7.98232	4.12629
Z003E0178	0.931515	NA	0.198662	4.4096	0.300882	3.23991	0.65763	8.9766	4.67928
Z003E0179	0.940764	0.479828	0.289728	2.11228	0.316596	2.83623	0.749083	6.09317	4.49015
Z003E0182	0.926482	0.511484	0.357167	5.96771	0.437582	2.01359	0.60033	6.98406	3.56479
Z003E0183	0.943671	0.399942	0.242877	3.3911	0.451891	2.78142	0.657949	6.74533	4.50202
Z003E0184	0.924686	0.395472	0.317566	5.93081	0.354638	2.09962	0.512967	7.68859	3.85943
Z003E0185	0.956739	0.377237	0.280061	2.941	0.401077	2.89846	0.733503	6.52114	4.00047
Z003E0187	0.953754	0.423029	0.263723	2.79456	0.463484	2.75993	0.719427	6.1403	4.58812
Z003E0189	0.920481	0.481539	0.282011	5.08651	0.308994	2.45251	0.564564	7.51261	3.84243
Z003E0191	0.933248	0.45692	0.254122	6.04414	0.321187	2.49597	0.532066	7.7244	3.93234
Z003E0192	0.947776	0.335154	0.129711	3.44859	0.385121	3.36891	0.648778	8.75511	5.4428
Z003E0193	0.9308	0.488869	0.438299	5.85661	0.419918	2.19219	0.651559	6.56949	3.78481
Z003E0194	NA	0.394586	0.219492	5.76955	0.317799	2.5548	0.446826	8.55163	4.49876
Z003E0196	0.91406	0.432306	0.26765	7.38841	0.241693	2.36903	0.557424	8.64945	4.17022
Z003E0198	0.933206	0.444444	0.336311	4.96402	0.336391	2.19791	0.489906	7.32049	3.72906
Z003E0199	0.959595	0.456442	0.273295	2.52655	0.413443	2.50088	0.722574	5.33712	4.02119
Z003E0212	0.95996	0.575583	0.348657	3.67563	0.478886	2.6466	0.740766	5.95456	3.73706
Z003E0220	0.926154	0.525278	0.378014	4.81665	0.427618	1.79046	0.66359	6.07615	3.1822
Z008E0002	0.950672	0.429042	0.28922	3.41925	0.412664	3.10048	0.722999	7.06209	3.95993
Z008E0003	0.952096	NA	0.173333	2.27204	0.418102	3.01365	0.713582	7.51054	4.32097
Z008E0004	0.940568	0.482677	0.370564	4.77901	0.410334	2.39653	0.557358	6.62399	3.46461
Z008E0006	0.943203	0.517006	0.324631	5.26798	0.390921	2.46992	0.616533	7.03335	3.36069
Z008E0007	0.933349	0.470764	0.290003	6.09874	0.428536	2.72535	0.531612	8.09197	3.7689
Z008E0008	0.94607	0.362504	0.205405	4.26365	0.349034	3.35682	0.626117	8.47774	5.03836
Z008E0009	0.941225	0.498876	0.330567	6.41879	0.244219	2.93955	0.508114	8.48881	4.0617
Z008E0010	0.941408	0.494402	0.268654	3.83449	0.429823	2.61035	0.619891	6.13682	4.05974
Z008E0011	0.929811	NA	0.233689	4.5506	0.426853	2.91914	0.738774	6.72662	3.86431
Z008E0013	0.949898	0.479128	0.259828	5.26153	0.363673	2.74526	0.543868	7.4935	4.04052
Z008E0014	0.940894	0.454157	0.371538	4.72294	0.433933	2.74414	0.640941	7.15688	3.66755
Z008E0016	0.955255	0.645466	0.338287	3.03224	0.434235	2.28817	0.658367	4.62851	3.25477
Z008E0017	0.958284	0.396052	0.341136	3.0658	0.261345	3.37771	0.735899	7.74878	4.24987
Z008E0018	0.959408	0.539109	0.26856	3.19836	0.243084	3.29334	0.722329	7.40091	NA
Z008E0019	0.944004	0.485517	0.275261	5.79393	0.375545	2.98931	0.552412	8.18909	4.0266
Z008E0020	0.937992	0.430989	0.318676	6.15513	0.427507	2.67359	0.546258	7.92438	3.77197
Z008E0021	0.956553	0.584757	0.29538	3.86417	0.429704	3.15591	0.683971	7.04537	3.53699
Z008E0022	0.937349	0.428363	0.212852	5.24899	0.412558	3.23957	0.494267	8.96296	4.05856
Z008E0023	0.953602	0.416283	0.148852	4.54519	0.226212	3.38311	0.661619	9.38595	NA
Z008E0024	0.955876	NA	NA	6.53119	0.343102	3.30147	NA	10.5149	4.21994
Z008E0025	0.948578	0.500065	0.231274	2.72434	0.296918	3.35445	0.73593	7.57168	4.90196
Z008E0026	0.956035	0.430204	0.269061	2.54515	0.42231	3.51357	0.718593	7.8556	4.58889
Z008E0028	0.93437	0.529928	0.325578	6.93968	0.313013	2.56429	0.454214	8.69848	4.61959
Z008E0029	0.951101	0.357502	0.318417	2.6366	0.444515	2.78569	0.725633	5.80744	3.97696
Z008E0030	0.947266	0.410482	0.208881	3.59242	0.359773	3.37184	0.678842	8.25586	4.52278
Z008E0031	0.939273	0.536144	0.273348	4.27674	0.435535	2.74607	0.613431	6.77747	3.66755
Z008E0032	0.937139	0.427329	0.384231	3.61669	0.431355	2.06402	0.703226	4.80658	2.82744
Z008E0033	0.947612	0.370782	0.178619	2.51511	0.332152	3.03641	0.700407	7.06027	4.15117
Z008E0034	0.932874	0.491871	0.272206	4.72252	0.404739	2.55046	0.586209	5.9311	3.67013
Z008E0035	0.939651	0.51889	0.283908	4.58189	0.312149	2.93732	0.450846	8.91303	4.43733
Z008E0037	0.94266	0.370244	0.18015	5.82115	0.40214	3.43314	0.53485	9.94443	4.23084
Z008E0038	NA	0.425651	0.361069	5.32611	0.209864	2.38549	0.4567	8.3303	4.24778
Z008E0039	0.94759	0.42088	0.181605	2.90462	0.394428	3.32202	0.711065	8.11167	4.71303
Z008E0040	0.943099	0.388255	0.193119	2.85276	0.390672	3.2818	0.707129	8.00765	4.21301
Z008E0041	0.944537	0.432343	0.231757	3.97097	0.215344	3.4814	0.554499	9.38365	4.95804
Z008E0042	0.960012	0.506131	0.253787	3.97172	0.42154	3.05335	0.728587	7.165	4.0621
Z008E0043	0.945149	0.449866	0.287816	4.79197	0.398943	2.72323	0.571872	7.26626	3.86579
Z008E0044	NA	0.406708	0.295245	5.53341	0.384553	2.3262	0.4861	7.67906	4.43648
Z008E0045	0.945148	0.528655	0.271418	7.25226	0.43154	2.81337	0.494141	8.77514	3.62744
Z008E0046	0.955538	NA	0.228225	4.08587	0.440327	3.46726	0.683177	8.71336	4.62374
Z008E0048	0.950605	0.456994	0.253851	4.65878	0.373756	2.74827	0.567691	7.65125	4.04893
Z008E0050	0.950874	0.357322	0.133083	3.43379	0.389148	3.15766	0.713704	7.75073	4.11208
Z008E0051	0.938698	0.340089	0.2396	5.68176	0.399399	3.07725	0.514335	8.99381	4.39256
Z008E0053	0.953656	0.445191	0.283871	1.72252	0.37827	3.07528	0.743107	6.42634	4.31546
Z008E0054	0.946567	0.447276	0.175915	4.69753	0.286277	3.63774	0.642899	9.53634	NA
Z008E0056	0.956517	0.448455	0.250273	2.40623	0.355933	3.71173	0.725708	8.95253	4.95644
Z008E0057	NA	0.393251	0.221013	6.14766	0.211306	3.13141	0.409822	9.57589	4.43876
Z008E0058	0.943566	0.575748	0.278858	6.50488	0.375112	2.64768	0.483016	8.24692	4.43721
Z008E0059	0.950512	0.485795	0.191756	5.95278	0.410998	2.57053	0.480042	8.41229	3.93911
Z008E0060	0.953372	0.384958	NA	2.63016	0.339238	3.02784	0.649041	7.41558	3.83367
Z008E0062	0.950536	0.384894	0.223014	3.97166	0.403431	2.9805	0.65876	7.55285	4.3249
Z008E0066	0.938949	0.443731	0.217036	5.54285	0.37964	3.12592	0.523887	8.73793	3.84716
Z008E0068	0.94151	0.547684	0.446809	5.52276	0.442689	2.33655	0.550503	6.94002	4.2233
Z008E0069	0.949277	0.402992	0.289656	6.89606	0.326984	2.93312	0.470233	9.23352	4.11622
Z008E0070	0.952923	NA	0.165995	2.77156	0.377455	3.87538	0.679657	10.1471	4.96686
Z008E0071	0.943976	0.537484	0.375012	4.12869	0.406531	1.88889	0.589103	5.41674	3.13115
Z008E0072	0.949447	0.369905	0.222733	3.85301	0.409001	2.70011	0.655946	6.778	4.04444
Z008E0073	NA	0.474138	0.349886	6.63258	0.314335	2.62358	0.491167	8.4562	3.46713
Z008E0077	0.953861	0.338636	0.233993	2.7563	0.442546	3.20832	0.712334	7.51533	4.36937
Z008E0079	0.928458	0.456955	0.154458	5.88788	0.290447	2.98444	0.460362	9.27811	4.32245
Z008E0082	0.952521	0.456502	0.204718	2.28834	0.393956	2.82073	0.744398	6.39231	3.93845
Z008E0083	0.952205	0.399672	0.177355	2.7761	0.397949	2.85243	0.709065	6.63001	4.15088
Z008E0085	0.949323	0.535678	0.341359	4.79385	0.438034	2.34515	0.603325	6.41097	3.35364
Z008E0086	0.952469	0.37482	0.276364	4.13697	0.432793	2.89917	0.698134	6.94629	3.86321
Z008E0087	0.941762	0.531042	0.306785	4.47244	0.440455	2.37182	0.599441	6.46974	3.25632
Z008E0088	0.956657	0.454044	0.155776	2.67478	0.330722	3.1562	0.704406	7.87128	4.04143
Z008E0090	0.936961	0.460454	0.328674	4.88865	0.359543	2.72721	0.567902	7.52696	3.67603
Z008E0091	0.943598	0.412074	0.245251	7.10491	0.403792	2.98939	0.433396	9.79984	4.1505
Z008E0092	0.954244	0.446615	0.279348	3.94461	0.405429	2.90925	0.726654	6.44059	3.8658
Z008E0094	0.931868	0.467693	0.303596	6.67167	0.336875	2.72391	0.474452	8.80094	4.43586
Z008E0097	0.960366	0.439013	0.18949	4.86547	0.257559	3.81366	0.66022	10.2122	NA
Z008E0098	0.955324	0.395222	0.197704	2.65216	0.35864	3.32595	0.694229	7.86393	4.94616
Z008E0101	0.965194	0.605233	0.173371	4.41422	0.435339	3.87257	0.738712	10.0504	4.61637
Z008E0102	0.93032	0.413204	0.173656	6.50881	0.355868	3.06831	0.520853	9.52763	3.75673
Z008E0103	0.963625	NA	0.162689	1.95126	0.354882	3.00516	0.786895	7.30885	4.0598
Z008E0105	NA	0.460533	0.352925	6.26102	0.225281	2.70805	0.550398	8.23814	4.43404
Z008E0106	0.939065	0.503674	0.288007	4.78528	0.443971	2.3721	0.587654	6.51874	3.54461
Z008E0107	0.946454	0.406012	0.15936	4.26198	0.428581	3.25352	0.644483	8.06276	NA
Z008E0110	NA	0.470455	0.302065	7.42457	0.27094	2.45854	0.455513	9.16997	4.43886
Z008E0112	0.931298	0.391458	0.218643	5.92742	0.346717	3.05322	NA	8.91514	4.22795
Z008E0113	0.951143	0.615982	0.480815	4.67841	0.431565	2.18234	0.676592	5.41606	3.11216
Z008E0115	0.925775	0.43706	0.342924	7.12779	0.393821	2.82718	0.411303	9.53429	4.3237
Z008E0118	0.957359	0.392217	0.165725	5.00374	0.409658	3.57818	0.619444	9.63941	5.04169
Z008E0119	0.941468	0.396125	0.264371	5.4453	0.429307	2.67541	0.610322	7.42441	3.93145
Z008E0120	0.948967	0.485862	0.325437	8.93436	0.400503	3.21522	0.507774	10.463	3.95134
Z008E0121	0.92482	0.463143	0.324519	7.49113	0.246765	2.51105	0.489522	8.82455	4.32192
Z008E0122	0.943643	0.488054	0.248786	6.83972	0.339933	2.69664	0.452595	8.89238	4.10765
Z008E0125	0.944526	0.426341	0.266537	5.05745	0.4312	2.90933	0.532817	7.81535	3.67107
Z008E0126	0.957065	0.449108	0.208852	2.15151	0.297429	3.22894	0.72929	7.29822	4.5991
Z008E0128	NA	0.487613	0.376364	5.41749	0.283385	2.56347	0.420838	8.19276	4.43576
Z008E0129	0.94785	0.336076	0.237345	4.60928	0.441783	3.61104	0.685332	9.50639	NA
Z008E0131	0.960515	0.333891	0.144536	2.50495	0.424986	3.19859	0.71577	8.66776	4.61905
Z008E0132	0.950691	0.317198	0.238624	4.95255	0.411969	3.42303	0.644584	9.0027	4.6184
Z008E0135	0.927518	0.457858	0.278504	6.99834	0.398664	2.90835	NA	9.18222	4.02507
Z008E0136	0.955696	0.334016	0.211634	3.62017	0.396164	3.70563	0.674177	9.82444	4.95218
Z008E0137	0.94445	0.486901	0.265744	4.18272	0.284472	3.16098	0.555285	7.95265	4.20212
Z008E0139	0.932961	0.448311	0.303585	5.85069	0.311099	2.71018	0.533241	7.95059	3.54307
Z008E0140	0.943675	0.407754	0.300398	3.82725	0.434743	2.78348	0.699309	6.28131	4.0631
Z008E0141	0.958563	NA	NA	3.37774	0.359796	3.57494	0.722	9.58187	NA
Z008E0142	NA	0.390225	0.286533	6.43589	0.309751	2.96121	0.470149	9.12806	3.86583
Z008E0143	0.953361	0.466564	0.185781	3.37206	0.384134	3.49381	0.725112	8.45221	4.21028
Z008E0144	NA	0.408396	0.291897	5.10783	0.429648	2.99575	0.609464	7.66008	3.66615
Z008E0145	0.942291	0.441472	0.403787	6.65854	0.415503	2.41592	0.530276	7.89153	3.66611
Z008E0146	0.952022	0.359097	0.25072	3.63609	0.354234	3.26167	0.642565	7.71899	4.59115
Z008E0147	0.935533	0.458227	0.248159	5.6884	0.423032	2.87818	0.489857	8.35414	4.25074
Z008E0150	0.949551	0.424356	0.257614	2.63477	0.38484	2.79834	0.73399	6.31941	3.57993
Z008E0153	0.933647	0.435353	0.267934	7.1026	0.387469	2.92234	NA	9.49821	3.82662
Z008E0154	0.95913	0.497948	0.285808	2.01666	0.39731	2.81616	0.752436	5.53343	3.75707
Z008E0155	0.953363	0.339067	0.228399	2.5981	0.424886	3.04868	0.706549	6.90754	3.95906
Z008E0159	0.948736	0.49858	0.345839	4.59407	0.427554	2.64716	0.62662	6.41124	3.84416
Z008E0160	0.949204	0.459763	0.470219	5.17965	0.387698	1.92302	0.643076	6.11332	2.92377
Z008E0162	0.958033	0.43103	0.381032	2.24659	0.364773	2.82166	0.761647	5.26285	3.44826
Z008E0165	0.950907	0.411219	0.205593	2.4456	0.297383	3.38368	0.692614	7.82022	4.23073
Z008E0167	0.93271	0.437603	0.314271	5.23478	0.400385	2.53354	0.554164	7.19048	3.76465
Z008E0168	0.952255	0.363044	0.20976	1.94712	0.391768	3.49531	0.744767	8.09155	4.74815
Z008E0170	0.932145	0.505059	0.309273	4.87447	0.238378	2.22209	0.556511	6.27671	3.667
Z008E0171	0.954545	0.446487	0.299447	3.13501	0.41833	2.66291	0.711041	5.90974	3.37087
Z008E0173	0.944625	0.453385	0.354397	6.09383	0.423957	2.77513	0.589586	7.93348	NA
Z008E0175	0.927679	0.390159	0.19404	5.28616	0.388511	3.15671	0.523923	8.91102	4.43449
Z008E0177	0.962456	0.405856	0.222451	3.12501	0.435903	3.2743	0.72499	8.27093	NA
Z008E0178	0.935146	0.493342	0.379026	4.71711	0.440023	2.08886	0.609779	5.96498	3.5935
Z008E0180	0.955691	0.369122	0.223259	3.27722	0.396243	3.22467	0.707767	7.41222	4.80399
Z008E0181	0.953957	NA	0.232571	3.34103	0.301996	3.27876	0.693797	8.32647	4.21344
Z008E0182	0.953436	0.347638	0.271362	2.56789	0.420196	3.03522	0.750722	6.46032	3.7747
Z008E0183	0.938908	0.41097	0.277585	6.42459	0.410332	2.7931	0.511349	8.70329	4.03892
Z008E0185	NA	0.355885	0.261776	5.92583	0.318229	3.02953	0.492924	9.17542	4.43524
Z008E0188	0.954957	0.367273	0.194007	2.65438	0.424214	3.38048	0.710933	7.92988	4.1258
Z008E0189	0.939718	0.516102	0.482452	4.71559	0.413032	2.31803	0.675914	6.06815	3.2602
Z008E0191	0.939427	0.495335	0.331478	4.47876	0.378509	2.58725	0.632353	6.58648	3.12258
Z008E0194	0.946702	0.350849	0.165618	2.74277	0.339014	3.45787	0.706358	8.46935	4.5781
Z008E0195	0.955326	0.438595	0.25614	3.12455	0.384016	3.01687	0.723988	6.80928	4.31704
Z008E0197	0.95124	0.512487	0.260506	5.48447	0.393334	2.85649	0.526462	7.91616	3.86579
Z008E0199	0.955745	0.408016	0.340199	3.54838	0.226421	3.36868	0.727217	8.13763	NA
Z008E0200	0.943744	0.496381	0.24543	5.33161	0.423892	2.82999	0.617401	7.79488	3.84421
Z008E0253	0.945809	0.430584	0.306737	5.29295	0.404873	3.16062	0.549453	8.38221	4.33481
Z010E0001	0.948382	0.46003	0.233069	4.31773	0.534789	2.67986	0.645133	6.7925	3.7994
Z010E0002	0.96946	0.527089	0.183381	3.42337	0.348379	2.96868	0.7581	6.81458	3.95368
Z010E0003	0.968724	0.558731	0.189257	2.69069	0.512362	2.9023	0.770055	5.68216	3.82555
Z010E0004	0.964617	0.471145	0.138763	3.06083	0.260958	3.12449	0.807735	7.77705	4.4179
Z010E0006	0.963123	0.384944	0.20387	2.51428	0.527658	2.97063	0.797113	6.51021	3.9511
Z010E0007	0.948923	0.53348	0.290781	5.30092	0.420364	2.3641	0.564265	7.3717	3.87787
Z010E0008	0.956232	0.631589	0.231592	4.21513	0.476004	3.55657	0.762173	8.34228	4.17778
Z010E0009	0.969981	0.489358	0.247024	1.92495	0.520895	2.94215	0.909564	5.74735	4.05253
Z010E0010	0.919648	0.465535	0.385264	7.07432	0.310435	2.54704	0.477699	9.02653	3.74849
Z010E0011	0.951307	0.531054	0.240867	6.24523	0.338008	3.07355	0.592744	8.56686	3.79864
Z010E0012	0.960316	0.665584	0.232391	5.79747	0.359437	2.79216	0.671783	7.38935	3.95601
Z010E0013	0.964658	0.35881	NA	0.723347	0.617755	3.41668	0.854456	7.9775	4.33105
Z010E0014	0.968881	0.395843	0.14171	2.83881	0.445431	3.35303	0.773913	7.93494	NA
Z010E0015	0.968814	0.454746	0.230514	1.94999	0.492174	2.99433	0.834745	6.05183	4.13655
Z010E0016	0.960107	0.529705	0.273633	4.49079	0.49801	2.62067	0.651269	6.46329	3.24915
Z010E0017	0.961512	0.361632	0.161982	3.40958	0.266504	2.87394	0.718703	7.62422	4.20755
Z010E0018	NA	0.428918	0.203479	6.97162	0.349683	2.88942	0.547446	9.41225	3.58954
Z010E0019	0.957318	0.346395	NA	3.3253	0.251583	3.11674	0.633902	8.61278	4.47881
Z010E0020	0.954599	0.593047	0.344283	4.99108	0.497778	2.48177	0.772193	6.14419	3.44706
Z010E0021	0.971887	0.370329	0.205857	1.70987	0.462696	3.07415	0.812335	6.71263	4.17817
Z010E0022	0.91821	0.434288	0.295887	6.87833	0.413618	2.78085	0.527678	8.45624	4.17987
Z010E0023	0.953119	0.413002	0.189845	2.97124	0.510535	3.20635	0.777587	7.04638	4.19418
Z010E0024	0.958377	0.526595	0.258158	2.62461	0.466722	3.26484	0.808189	6.84675	4.2123
Z010E0025	0.964293	0.378528	0.219386	2.66843	0.511248	3.45816	0.713563	8.08862	4.31225
Z010E0026	0.962834	0.468353	0.170997	3.35503	0.508667	3.16599	0.709647	7.79903	4.24787
Z010E0027	0.952834	0.479831	0.165534	4.81187	0.37548	2.883	0.497265	7.85144	4.22635
Z010E0028	0.955581	0.596848	0.261876	4.6899	0.475801	2.69349	0.585519	6.87986	3.74084
Z010E0029	0.95957	0.445901	0.162958	2.68126	0.505521	2.9971	0.783977	6.65966	3.68453
Z010E0031	0.957257	0.485414	0.223079	5.44164	0.397524	2.9522	0.812272	7.61627	3.52744
Z010E0032	0.968709	0.575763	0.207868	4.98843	0.33941	3.23111	0.748977	8.45455	4.0603
Z010E0033	0.965744	0.587001	0.194232	5.28119	0.416086	2.82683	0.728805	6.98428	3.57748
Z010E0034	0.955858	0.491955	0.182585	6.45422	0.277825	2.7682	0.61198	8.36082	4.04492
Z010E0035	0.96445	0.489254	0.162678	3.17801	0.28905	3.16677	0.766196	7.67711	4.12519
Z010E0036	0.9476	0.420799	0.156875	7.20295	0.25297	3.0604	0.568845	9.49168	4.27637
Z010E0037	0.961992	0.521344	0.272099	2.41603	0.507661	3.03096	0.762341	5.94466	3.8019
Z010E0038	0.962826	0.449182	0.1935	2.08171	0.320947	3.17548	0.777803	7.07416	4.05724
Z010E0039	0.965358	0.440977	0.184647	3.9053	0.367776	3.06644	0.584972	7.48164	3.95547
Z010E0040	0.960829	0.649531	0.281706	5.71544	0.383595	2.73991	0.728032	7.01452	3.33057
Z010E0041	0.960523	0.497122	0.194058	2.22459	0.425828	3.34427	0.806529	7.33843	4.29115
Z010E0042	0.971816	0.518551	0.165305	3.60662	0.453401	2.95711	0.772417	6.95745	3.95765
Z010E0043	0.962717	0.508012	0.253646	1.84017	0.442953	3.10289	0.833058	6.51399	3.84708
Z010E0044	0.957893	0.475777	0.207618	2.50839	0.44734	3.20066	0.736859	7.3777	4.27277
Z010E0045	0.962172	0.401562	0.288236	5.29633	0.536895	3.24723	0.582618	8.7334	4.28103
Z010E0046	0.966983	0.333041	0.147577	2.37408	0.366209	3.45333	0.769051	8.53076	4.41257
Z010E0047	0.952638	0.602251	0.337411	5.88225	0.449984	2.25295	0.679803	6.60508	3.75962
Z010E0048	0.968058	0.506462	0.297157	4.82868	0.5235	2.53891	0.687744	6.72813	3.54603
Z010E0049	0.940019	0.47903	0.32299	5.5912	0.338667	3.06637	0.711016	7.95407	3.5894
Z010E0050	0.920509	0.54956	0.304002	7.28231	0.441911	2.66439	0.645834	8.59194	4.06802
Z010E0051	0.959688	0.44225	0.204628	2.37903	0.36434	3.41559	0.789127	7.67526	4.31512
Z010E0052	0.949824	0.608037	0.400596	5.05226	0.510343	2.55308	0.775485	5.9938	3.65551
Z010E0053	0.935811	0.324436	NA	4.22399	0.274555	2.96091	0.681326	8.39489	4.03975
Z010E0055	0.938045	0.412016	0.283667	4.32405	0.46531	2.58178	0.642689	7.01205	3.59087
Z010E0056	0.971836	NA	0.126415	4.07305	0.314703	3.21576	0.729272	8.41481	4.36652
Z010E0057	0.972719	0.506998	0.189475	2.27788	0.293345	3.23772	0.821871	6.70969	3.95339
Z010E0058	0.969415	0.409274	0.158734	3.01371	0.40346	3.39279	0.726773	8.17446	4.40171
Z010E0059	0.966649	0.356507	NA	2.83596	0.397682	3.37721	0.721517	8.52173	4.48733
Z010E0060	0.950092	0.62866	0.322241	5.41193	0.498262	2.74689	0.743069	6.70682	3.84912
Z010E0061	0.948067	0.643518	0.304867	7.51009	0.306442	2.69743	0.649797	8.35801	3.7955
Z010E0062	0.960545	0.509282	0.168829	7.10994	0.254432	2.87828	0.555496	9.1898	4.10797
Z010E0063	0.962496	0.346092	0.203991	3.70086	0.347171	3.03811	0.735033	7.51407	4.36556
Z010E0064	0.960717	0.379032	NA	2.00206	0.601176	3.436	0.837505	7.36907	4.37433
Z010E0065	0.953495	0.542349	0.345409	6.73741	0.54144	2.42424	0.554008	7.60792	3.30444
Z010E0066	0.959989	0.479423	0.191726	2.32211	0.540862	3.22292	0.786789	7.04126	3.94663
Z010E0067	0.962545	0.627018	0.269005	6.1634	0.476375	2.8888	0.660578	7.90074	3.98986
Z010E0068	0.964678	NA	0.166036	5.11593	0.233909	3.26411	0.744605	8.69273	NA
Z010E0069	0.96625	0.364648	0.151565	3.18625	0.414647	3.36669	0.752767	8.23587	4.34862
Z010E0070	0.966472	0.545664	0.21226	2.84506	0.490572	3.47924	0.770456	7.49639	3.76011
Z010E0071	0.950849	0.428788	0.148698	4.55885	0.330763	3.59798	0.667101	9.42237	4.36436
Z010E0072	0.945448	0.348336	0.181443	3.56602	0.196811	3.72452	0.732122	9.75787	3.75694
Z010E0073	0.955949	0.54374	0.271476	3.82769	0.533667	2.85924	0.662539	6.74752	3.21462
Z010E0074	NA	0.387961	0.159797	8.57897	0.213373	3.26724	0.476522	11.3569	NA
Z010E0075	0.948639	0.523895	0.233872	5.31355	0.450355	2.73424	0.516726	7.62299	3.59129
Z010E0076	0.962066	0.591821	0.309826	4.17591	0.348861	3.02737	0.612834	7.2751	3.83891
Z010E0077	0.951714	0.531409	0.255347	5.66123	0.495116	2.36796	0.675593	6.50636	3.62845
Z010E0078	0.973799	0.419682	0.164906	2.18438	0.38843	3.30595	0.760577	7.60705	NA
Z010E0079	0.962939	0.478133	0.197982	3.30805	0.443994	3.41681	0.709098	8.1185	4.11583
Z010E0080	0.964383	0.475542	0.178493	2.79449	0.500887	3.3035	0.822706	7.29782	3.9725
Z010E0081	0.943621	0.487032	0.203454	5.01294	0.416119	2.86798	0.671067	7.61358	4.10378
Z010E0082	0.9537	0.462944	0.161261	4.42993	0.405314	2.60415	0.557332	6.93934	3.95307
Z010E0083	0.957043	0.63729	0.238159	2.05577	0.571793	3.25469	0.844002	6.5634	3.95545
Z010E0084	0.959107	0.666142	0.225308	3.12424	0.336227	3.09023	0.784504	6.45218	4.09758
Z010E0085	0.966545	0.373615	0.170674	3.55818	0.449447	3.18047	0.646575	7.85429	4.46712
Z010E0086	0.958209	0.525144	0.203165	3.37346	0.396	2.89843	0.626502	6.43178	4.06532
Z010E0087	0.944178	0.524872	0.307791	5.48755	0.460337	2.45395	0.503393	7.22858	3.59568
Z010E0088	0.968129	0.524607	0.200109	1.77239	0.526227	2.78548	0.778959	5.60898	3.82695
Z010E0089	0.967963	0.45861	0.176644	3.08598	0.463627	3.55813	0.710623	8.55186	4.12422
Z010E0090	0.96963	0.347811	NA	2.47332	0.347482	3.47047	0.779709	8.95003	4.40024
Z010E0091	0.94455	0.588245	0.189454	6.27262	0.333564	2.65241	0.591264	8.06457	4.11629
Z010E0092	0.951646	0.505816	0.328703	4.89869	0.372291	2.65855	0.60281	7.33728	3.9841
Z010E0093	0.964272	0.506848	0.250818	2.34667	0.41649	3.58908	0.834269	7.57647	4.50837
Z010E0094	0.954613	0.559303	0.270882	6.15271	0.494028	2.86197	0.724623	7.42075	3.95086
Z010E0095	0.961336	0.357513	0.142755	2.36099	0.261024	2.92414	0.756453	7.15013	NA
Z010E0096	0.957662	0.570481	0.388874	6.34398	0.466625	2.54447	0.729201	6.7368	3.33451
Z010E0097	0.948049	0.459818	0.328651	6.11182	0.474213	2.70945	0.776336	7.11841	3.59066
Z010E0098	0.959733	0.382547	0.2072	3.29286	0.25445	3.6586	0.718633	9.16423	4.33586
Z010E0099	0.949988	0.476548	0.222154	6.39642	0.494863	3.02161	0.664977	8.59442	4.49151
Z010E0100	0.942594	0.524867	0.212543	7.38732	0.436028	3.06963	0.622066	9.07218	4.06332
Z010E0101	0.954846	0.460205	0.201906	2.10957	0.533681	3.28704	0.786959	6.93629	4.37234
Z010E0102	0.968466	0.671833	0.231439	5.47465	0.454996	2.67929	0.720362	6.54122	3.83164
Z010E0103	0.961224	0.429492	0.15734	2.54844	0.346046	3.52354	0.786184	8.54218	4.4311
Z010E0104	0.953559	0.397773	0.157414	3.84477	0.356256	3.26894	0.680351	8.46644	4.31927
Z010E0106	0.958223	0.553316	0.352598	4.01988	0.395482	2.91663	0.708091	6.26382	3.92526
Z010E0107	0.950725	0.606502	0.334336	4.25765	0.385347	2.63422	0.676906	6.30186	3.17322
Z010E0108	0.936385	0.441974	0.250652	5.51403	0.35406	2.86336	0.601273	7.96323	4.05185
Z010E0109	0.958357	0.684346	0.264683	5.12722	0.4276	2.79293	0.497082	7.07739	3.96207
Z010E0110	0.955101	0.557573	0.270843	5.92159	0.335692	2.93876	0.692655	7.38624	4.09499
Z010E0111	0.974566	0.410434	0.164211	2.87751	0.288114	3.76828	0.724196	9.34577	4.32194
Z010E0112	0.938725	0.560566	0.314916	5.63728	0.495437	2.55004	0.71399	6.69775	3.1415
Z010E0113	0.964749	0.419813	0.208504	2.89306	0.311723	3.60309	0.783748	8.79424	4.34316
Z010E0114	0.967665	0.517584	0.176185	1.90247	0.444899	3.08187	0.786977	6.42202	3.10961
Z010E0115	0.963638	0.707484	0.31242	5.774	0.292824	2.30091	0.526041	7.115	3.23839
Z010E0116	0.966294	0.563728	0.266714	1.91632	0.504095	2.89439	0.809803	5.42221	3.812
Z010E0117	0.965873	0.652641	0.265519	4.19752	0.478266	3.05946	0.665797	6.95338	4.36418
Z010E0118	0.9349	0.412293	0.240148	6.07189	0.382453	2.97127	0.711088	8.38829	3.97469
Z010E0119	0.934415	0.518692	0.282651	5.93547	0.415115	2.54965	0.663007	7.20913	3.37468
Z010E0121	0.955809	0.384277	0.187424	2.49318	0.453962	3.48547	0.805271	8.14285	4.36333
Z010E0122	0.966033	0.427136	0.179497	2.07202	0.422588	3.19711	0.789098	7.09417	4.49095
Z010E0123	0.942305	0.446623	0.250368	6.69924	0.240525	2.64718	0.590121	8.52529	3.81039
Z010E0124	0.964523	0.524379	0.335733	5.71639	0.547281	2.98908	0.688857	7.47893	3.95563
Z010E0125	0.966833	0.353032	0.195883	4.1718	0.461223	3.37224	0.653495	8.6281	4.21112
Z010E0126	0.961421	0.513579	0.262953	2.07304	0.518147	3.03266	0.800017	6.24009	3.49109
Z010E0127	0.953008	0.519835	0.212111	5.54795	0.258673	2.85498	0.392984	8.8928	3.97322
Z010E0128	0.958735	0.425696	0.220024	6.945	0.412006	2.89934	0.591407	8.36591	4.08706
Z010E0129	0.952495	0.492682	0.259376	2.68223	0.499033	2.81921	0.771936	5.81468	3.95913
Z010E0130	0.966284	0.535121	0.201282	2.29893	0.568846	3.47327	0.78624	7.70767	4.26952
Z010E0131	0.951083	0.354295	0.236688	4.69705	0.271402	3.51644	0.580064	9.46146	4.50657
Z010E0132	0.957361	0.560381	0.272063	5.86206	0.475778	2.81955	0.692427	7.40337	3.80816
Z010E0133	0.956553	0.519567	0.161169	3.82119	0.329777	3.08631	0.704695	7.52982	4.33131
Z010E0134	0.95507	0.55381	0.220511	5.59367	0.306019	2.83998	0.394188	8.7824	3.97498
Z010E0135	0.955817	NA	0.148114	5.53329	0.339825	3.72773	0.6467	10.3994	4.54983
Z010E0136	0.947605	0.446565	0.20787	3.27424	0.451998	3.10835	0.728528	7.27545	NA
Z010E0137	0.970598	0.451819	0.227431	2.91036	0.404618	3.04427	0.816048	6.53772	4.11193
Z010E0138	0.960656	0.627249	0.275442	6.62209	0.431486	2.52048	0.637406	7.46708	3.32227
Z010E0139	0.964336	0.466749	0.235366	2.39929	0.516486	2.82295	0.777953	5.57801	3.69365
Z010E0140	0.959583	NA	0.153126	2.99856	0.272359	3.2124	0.739824	7.6427	4.36591
Z010E0142	0.948958	0.482701	0.19662	6.5565	0.265782	3.06234	0.59916	8.77856	4.36644
Z010E0143	0.956886	0.485448	0.202291	5.11813	0.42571	2.7266	0.69365	6.79717	3.13567
Z010E0144	0.96229	0.416045	0.192017	2.93252	0.478999	2.97624	0.673952	6.96184	4.02268
Z010E0145	0.965913	0.505505	0.16366	1.8832	0.403537	3.31586	0.840042	7.24962	4.09839
Z010E0147	0.942298	0.514532	0.239199	6.29137	0.38539	2.84207	0.586511	8.12609	3.8025
Z010E0149	0.943325	0.436172	0.215379	4.42165	0.355282	2.81257	0.524749	7.72343	3.86787
Z010E0150	0.916295	0.433852	0.21519	6.74855	0.393109	2.97399	0.558024	9.12167	4.1233
Z010E0151	0.951428	0.444916	0.231144	3.14016	0.528113	3.01563	0.726638	6.40406	3.56358
Z010E0152	0.972672	0.421876	0.175914	3.64919	0.25933	3.70842	0.789128	9.31284	4.31728
Z010E0153	0.946757	0.582797	0.309525	5.43819	0.354325	2.66585	0.678294	7.47165	3.16544
Z010E0155	0.937369	0.430401	0.179698	5.56616	0.426834	2.888	0.523888	8.52816	4.0445
Z010E0156	0.960835	0.625518	0.316167	5.78095	0.478585	2.97896	0.720444	7.55664	3.98569
Z010E0157	0.948976	0.532105	0.269974	5.11044	0.566726	2.6847	0.574834	6.75343	3.51765
Z010E0158	0.951692	NA	NA	3.0132	0.305892	3.07371	0.702327	7.89835	4.17559
Z010E0159	0.944179	0.539894	0.220892	5.20277	0.436189	2.70724	0.545475	7.29076	3.59014
Z010E0160	0.968624	0.485549	0.162588	2.1916	0.207881	3.46463	0.777769	7.68192	4.47449
Z010E0161	0.962581	0.407978	0.135395	2.0396	0.558497	3.07995	0.784323	6.82313	4.27863
Z010E0162	0.967465	0.470335	0.203245	3.71801	0.472902	3.05761	0.749531	7.00589	4.18005
Z010E0163	0.935107	0.493998	0.257835	7.17728	0.457202	3.11902	0.69636	9.08547	3.94081
Z010E0164	0.959153	0.312305	0.178805	4.59986	0.365819	3.42241	0.731285	8.95681	4.27526
Z010E0165	0.966922	0.604854	0.2637	5.40783	0.291747	2.22657	0.624948	6.5027	3.20379
Z010E0166	NA	0.485131	0.204214	6.64583	0.396024	2.86138	0.637254	8.72584	3.98838
Z010E0167	0.96443	0.486638	0.207301	4.68031	0.465562	2.46649	0.540842	6.95729	3.15153
Z010E0169	0.950112	0.433066	0.183928	4.59453	0.290184	3.31294	0.687943	8.09675	4.32552
Z010E0170	0.938889	0.621665	0.433866	6.80128	0.486011	2.76464	0.731939	7.64997	3.79871
Z010E0172	0.962193	0.457968	0.174261	2.9342	0.517852	3.5138	0.81354	8.05856	4.20679
Z010E0173	0.962153	0.672879	0.245445	5.59338	0.497892	2.9886	0.676465	7.9089	3.53421
Z010E0174	0.937789	0.442335	0.153748	5.73858	0.288045	3.17659	0.568948	8.92085	NA
Z010E0175	0.935724	0.651068	0.361063	6.34459	NA	2.56099	0.652507	7.90782	3.98136
Z010E0176	0.96469	0.482476	0.213168	4.11325	0.333711	3.52653	0.733338	8.27905	4.36706
Z010E0178	0.958683	0.499472	0.21494	3.90794	0.408951	3.32296	0.751446	7.85503	4.03873
Z010E0179	0.959406	0.627832	0.251324	4.62585	0.559336	2.81784	0.65279	6.13212	3.13528
Z010E0180	0.956882	NA	0.151847	3.03369	0.468065	2.98229	0.74146	6.73379	4.18392
Z010E0181	0.948902	0.574525	0.287138	6.17976	0.486625	2.64022	0.698858	7.42242	3.8169
Z010E0182	0.962923	0.427747	NA	3.33191	0.220574	3.66975	0.62015	10.1055	4.32603
Z010E0184	0.969685	0.412006	0.243053	2.29962	0.431324	3.00916	0.811323	6.25464	4.1827
Z010E0185	0.956142	0.533582	0.289367	5.00492	0.335566	2.51256	0.634364	6.60539	3.17572
Z010E0186	0.96981	0.624895	0.243082	4.24207	0.39107	2.51834	0.70665	5.45293	3.14376
Z010E0187	0.955638	0.424851	0.160122	3.65683	0.315385	3.21522	0.700589	8.29141	4.54714
Z010E0188	0.969005	0.421206	0.194525	6.33127	0.23905	3.15531	NA	9.65998	3.95976
Z010E0189	0.963212	0.448449	0.222759	6.78222	0.425931	3.01546	0.666221	8.5579	3.38722
Z010E0190	0.960629	NA	NA	4.09878	0.251714	NA	0.730859	11.3315	4.34278
Z010E0191	0.960555	0.617331	0.229438	5.48118	0.328032	2.66026	0.660276	7.04269	3.9667
Z010E0192	0.932932	0.508116	0.205474	4.68523	0.47618	3.03958	0.642984	7.69692	3.59522
Z010E0193	0.964069	0.572706	0.303789	5.25196	0.457659	2.27349	0.647049	6.18839	3.28461
Z010E0194	0.963397	0.405342	0.162722	2.27627	0.496546	3.31332	0.802786	7.33031	4.45179
Z010E0195	0.958114	0.550127	0.183706	2.5447	0.523915	3.28022	0.794405	6.85793	4.21086
Z010E0196	0.957602	0.519681	0.208559	4.61134	0.51389	3.33104	0.75661	8.33776	4.45182
Z010E0197	0.937194	0.523831	0.253037	6.1841	0.42733	2.68634	0.551341	7.99145	3.9753
Z010E0198	0.96445	0.391451	0.147304	2.49865	0.322324	3.05152	0.75826	7.26407	4.44096
Z010E0200	0.933678	0.586363	0.343983	5.67981	0.380722	2.39505	0.717871	6.49562	3.14816
Z010E0214	0.957658	0.605893	0.201872	6.58616	0.306095	2.88713	0.595897	8.58242	4.1238
Z012E0001	0.93323	0.52517	0.460694	4.13194	0.549072	2.05301	0.639045	5.51193	3.27559
Z012E0003	0.956686	0.451501	0.176791	3.19772	0.232278	3.46931	0.679695	8.39945	4.46428
Z012E0004	0.942377	0.47279	0.274268	6.0687	0.360866	2.61164	0.565366	8.0185	3.06655
Z012E0005	0.965185	0.424564	0.194162	3.39404	0.360467	3.49637	0.673615	8.15066	5.0084
Z012E0006	0.968217	0.495578	0.261734	2.25953	0.504038	2.39681	0.72685	4.78316	4.42722
Z012E0007	0.94493	0.564716	0.500825	4.67388	0.36202	1.67171	0.639566	5.09063	3.05479
Z012E0008	0.952705	0.434183	0.328587	2.45502	0.454422	2.12526	0.731592	4.25063	3.4509
Z012E0009	0.971886	0.449426	0.200589	8.00791	0.219232	3.08196	0.428416	10.626	3.9508
Z012E0010	0.93621	0.503578	0.249772	6.41098	0.41439	2.65203	0.54611	8.76456	4.59837
Z012E0011	0.921864	0.374439	0.284265	7.06676	0.242684	3.17687	0.575077	9.73688	4.80997
Z012E0012	0.932052	0.598489	0.50015	5.0543	0.503	1.56424	0.679539	5.30222	2.96599
Z012E0013	0.949041	0.36032	0.2509	3.51601	0.339389	3.25056	0.728982	8.25394	NA
Z012E0014	0.917277	NA	0.331881	4.07502	0.209844	3.46189	0.671632	8.83077	4.99603
Z012E0015	0.915525	0.418447	0.291877	5.85588	0.403171	1.82516	0.550112	6.67908	3.68556
Z012E0016	0.955686	0.574888	0.469877	3.33763	0.513758	2.06585	0.721291	4.01951	3.15496
Z012E0017	0.968831	0.516844	0.2259	4.43599	0.200488	3.8404	0.530568	10.0109	4.46887
Z012E0018	0.944814	0.526646	0.420539	6.24624	0.517986	1.22345	0.571218	6.254	3.03415
Z012E0020	0.942093	0.502942	0.278197	2.98212	0.245517	2.35323	0.65436	5.41538	3.51544
Z012E0021	0.948515	0.437198	0.180751	2.19562	0.461136	2.9931	0.728082	6.6418	4.82526
Z012E0022	0.912576	0.500119	0.369841	7.56691	0.51828	1.16322	0.476664	8.05223	3.51418
Z012E0023	0.917327	0.408698	0.251924	7.95456	0.358131	2.32204	0.442594	9.11303	3.99603
Z012E0024	0.933643	0.516755	0.297279	8.48927	0.437334	2.5636	0.448276	9.71854	NA
Z012E0025	0.918951	0.656031	0.293097	6.19967	0.400071	2.11065	0.516438	7.47082	3.86754
Z012E0026	0.930429	0.389767	0.379233	5.21513	0.467916	2.38082	0.529165	7.84281	4.44798
Z012E0027	0.972366	NA	0.203484	1.66781	0.544191	2.69766	0.696724	5.87987	5.02637
Z012E0028	0.91836	0.517529	0.364181	5.21552	0.513703	2.6278	0.539286	7.43594	3.77073
Z012E0029	0.942462	0.387866	0.213833	3.31999	0.408925	2.55285	0.690661	6.37189	4.25851
Z012E0030	0.929797	0.381399	0.292396	5.73281	0.359296	2.42835	0.490687	7.15375	4.20692
Z012E0031	0.944441	0.521621	0.241986	1.85639	0.576394	2.79996	0.728225	5.64258	4.67499
Z012E0032	0.946112	0.449527	0.250792	2.45538	0.286603	3.80511	0.628176	9.12642	4.48319
Z012E0033	0.95913	0.470193	0.277037	3.8601	0.449502	2.08311	0.685481	5.51667	3.26835
Z012E0034	0.950881	0.454521	0.31369	1.80219	0.443396	2.28427	0.736431	4.45469	3.15346
Z012E0035	0.921877	0.395506	0.331912	7.06337	0.378181	2.42592	NA	8.52651	3.90092
Z012E0037	0.940113	0.455728	0.282269	3.89007	0.568147	2.24217	0.710682	5.84542	4.0914
Z012E0038	0.943476	0.348204	0.20318	6.19984	0.199862	2.32849	NA	8.38681	5.00545
Z012E0039	0.944163	0.36557	0.228821	3.31572	0.512536	3.31165	0.71799	7.68424	4.61442
Z012E0040	0.920636	0.459253	0.287289	6.2478	0.34971	3.39457	0.459232	9.8453	3.07573
Z012E0041	NA	0.342206	0.223989	5.23203	0.395346	3.14168	0.478822	9.09625	NA
Z012E0042	0.957506	0.471498	0.29184	4.71524	0.499172	3.30188	0.690635	8.31427	4.44579
Z012E0043	0.963218	0.465621	0.266095	2.81178	0.511426	2.26978	0.734477	5.4455	4.06955
Z012E0044	0.953937	0.490755	0.231649	2.12899	0.46926	3.0254	0.74193	5.76692	3.89363
Z012E0045	0.917912	0.498699	0.379627	6.6643	0.519845	2.7413	0.509759	8.61707	4.66789
Z012E0046	0.936499	0.534409	0.219331	7.17552	0.19871	3.09315	NA	9.92306	3.88571
Z012E0047	0.937635	0.383602	0.189482	5.80432	0.351229	3.19112	0.683634	9.25374	3.88059
Z012E0048	0.930368	0.554575	0.410838	5.6508	0.367695	1.7357	0.541132	6.11073	2.95304
Z012E0049	0.910765	0.46128	0.305071	4.39085	0.52736	2.81383	0.695063	6.47837	3.79573
Z012E0050	0.943044	0.507021	0.384972	6.5499	0.392836	2.01038	0.537037	7.11492	4.23215
Z012E0051	0.947613	0.427968	0.261725	2.54735	0.56314	2.22237	0.719249	5.34285	3.71527
Z012E0052	0.944763	0.35985	0.1713	2.78477	0.539842	2.69204	0.682228	6.5381	5.07667
Z012E0053	0.947526	0.45726	0.185982	2.37882	0.559234	2.92247	0.726154	6.39162	4.45318
Z012E0055	0.931051	0.548934	0.38875	5.33759	0.482093	2.24699	0.591869	6.32861	3.61147
Z012E0056	0.942179	0.50111	0.386265	5.3751	0.36244	2.50023	0.43975	7.58301	4.06794
Z012E0058	0.958362	0.462621	0.2205	1.01512	0.653446	2.03419	0.686271	3.8034	3.88406
Z012E0059	0.941804	0.613682	0.390098	5.45231	0.499695	1.33576	0.609201	5.61016	3.17017
Z012E0060	0.954548	0.49229	0.277758	3.3467	0.530304	3.56988	0.700445	8.30944	4.50807
Z012E0061	0.926094	NA	0.22755	3.28897	0.489594	3.72519	0.722366	10.0127	5.0078
Z012E0062	0.950144	0.356395	0.242849	2.65369	0.565588	3.46782	0.765237	7.75458	4.61415
Z012E0063	0.951628	0.403959	0.311449	2.74041	0.57782	2.33815	0.758253	3.75368	4.07293
Z012E0064	0.964741	0.505712	0.156421	3.993	0.419402	2.96483	0.662026	8.15239	NA
Z012E0065	0.940119	0.41728	0.226916	3.08567	0.495496	2.62357	0.674761	5.97077	3.76187
Z012E0066	NA	0.508966	0.180548	4.38779	0.434945	2.93367	0.534855	7.94182	4.99191
Z012E0067	0.944977	0.455298	0.282787	5.78453	0.238109	2.85103	0.51051	8.32119	4.466
Z012E0068	0.926395	0.44713	0.263814	7.13184	0.486929	2.42242	0.412336	8.91436	3.95914
Z012E0069	0.940102	0.43482	0.273897	2.60644	0.465067	3.41134	0.722059	7.80099	4.20633
Z012E0070	0.925529	0.591214	0.359958	4.87884	0.519801	2.35769	0.565645	6.65956	3.62153
Z012E0071	0.934963	0.394943	0.19601	1.93731	0.456386	3.8444	0.696715	9.40203	5.00723
Z012E0072	0.950716	0.38265	0.311871	3.80809	0.360653	3.39891	0.644362	8.11756	4.3524
Z012E0074	NA	0.443169	0.260608	7.69503	0.216694	2.92273	NA	11.1467	NA
Z012E0075	0.960916	0.394766	0.307916	3.25018	0.449381	2.63217	0.727014	6.76814	NA
Z012E0076	0.952852	0.470011	0.27225	5.8873	0.248758	2.80847	0.443163	8.96523	4.22603
Z012E0077	0.925482	0.495629	0.341226	7.18203	0.337426	1.69402	0.440737	7.90684	3.97686
Z012E0078	0.93106	0.414848	0.198385	3.59948	0.398888	3.47713	0.680193	10.3136	4.99895
Z012E0079	0.931425	0.37333	0.178157	6.89006	0.319085	3.47972	0.454489	11.0374	5.07281
Z012E0080	0.955089	0.413749	0.26674	3.0885	0.385126	2.9677	0.714942	6.50645	4.71241
Z012E0081	0.95268	0.498466	0.305755	6.00103	0.380556	1.79635	0.528538	6.8308	3.71438
Z012E0082	0.947202	0.323475	0.190407	2.30525	0.435404	2.42033	0.713836	5.85013	4.4616
Z012E0083	0.956394	0.538977	0.207313	2.92956	0.388939	3.51035	0.741398	7.73393	5.00206
Z012E0084	0.934036	0.303795	0.251922	4.06783	0.29508	2.79705	0.694881	7.29518	5.01364
Z012E0085	0.952106	0.342461	0.199669	2.97104	0.394258	3.10531	0.696324	6.97602	4.9954
Z012E0086	0.930328	0.453285	0.392882	5.24967	0.531244	2.02836	0.584522	6.26586	3.69391
Z012E0087	0.921821	0.522888	0.363656	6.61629	0.4743	2.72229	0.533285	8.33298	3.72545
Z012E0088	0.954232	0.460916	0.217236	1.88233	0.342672	2.63868	0.709232	6.01857	4.10805
Z012E0089	0.927081	0.508031	0.327831	6.03983	0.433692	2.10236	0.529445	7.49538	4.16218
Z012E0090	NA	0.519327	0.374791	5.70306	0.328707	1.96405	0.52928	6.81103	3.08647
Z012E0092	0.951044	0.42059	0.292639	3.32599	0.410967	2.16571	0.649025	5.11688	3.99526
Z012E0093	0.948795	0.469425	0.256326	3.26576	0.495466	3.32642	0.702487	7.81678	5.07121
Z012E0095	0.948545	0.435884	0.226743	6.1361	0.430395	2.83844	0.560247	8.59844	4.37872
Z012E0096	0.93957	0.406891	0.264142	2.75559	0.451104	3.40034	0.729424	7.61534	4.7626
Z012E0097	0.933853	0.544147	0.288545	5.89816	NA	2.47082	NA	8.0795	3.48121
Z012E0099	0.976969	0.334182	0.180877	3.02125	0.270026	3.34436	0.712953	8.32291	NA
Z012E0101	0.926393	0.485017	0.313707	6.18774	0.242487	2.82634	0.533759	8.87577	4.04251
Z012E0102	NA	0.50537	0.236118	4.76525	0.344253	2.61989	0.443511	8.50777	4.63336
Z012E0103	0.956903	0.48051	0.464449	5.05057	0.323592	2.15777	0.535968	6.24968	3.06125
Z012E0104	0.923905	0.559207	0.325063	4.56994	0.41856	2.31128	0.633693	6.07494	3.6275
Z012E0106	0.962498	0.488718	0.202535	2.39677	0.28153	3.81745	0.703573	9.45755	4.9967
Z012E0107	0.946245	0.467807	0.285721	4.32493	0.452998	2.76881	0.66761	7.02195	3.45504
Z012E0108	0.938189	0.46699	0.220227	5.59511	0.365255	2.31708	0.537656	7.4179	3.97841
Z012E0109	0.927418	0.583908	0.429357	5.49374	0.44973	1.82917	0.574148	6.18379	3.79401
Z012E0110	0.926724	0.53022	0.290622	5.75454	0.423593	2.51412	0.540093	7.39886	3.48391
Z012E0111	0.941196	0.574056	0.459955	4.4897	0.356326	2.59514	0.665916	6.08043	3.89804
Z012E0112	0.937616	0.397577	0.234889	4.58356	0.40581	2.55948	0.606087	7.20107	4.81268
Z012E0113	0.943773	0.415282	0.328273	2.64904	0.358405	1.88168	0.699671	4.66057	3.4119
Z012E0114	0.943854	0.48907	0.222192	3.17871	0.444805	3.33563	0.710674	8.01132	4.47548
Z012E0115	0.947246	0.541896	0.259533	3.85537	0.373982	2.78354	0.553136	6.65275	4.81205
Z012E0116	0.920663	0.478558	0.329267	5.9872	0.382491	1.88256	0.546525	6.52517	3.43094
Z012E0117	0.924906	0.479408	0.317524	5.29341	0.359169	2.40945	0.573018	6.79428	3.80249
Z012E0118	0.926345	NA	NA	3.41928	0.459131	2.94691	0.647376	7.88448	5.00871
Z012E0119	0.968809	0.605489	0.300863	5.58896	0.205013	2.45388	NA	7.23797	3.87352
Z012E0120	0.939767	0.555971	0.328144	5.45608	0.46543	2.93773	0.578832	7.32514	3.68247
Z012E0121	0.918888	0.520516	0.405418	5.36545	0.489114	2.27001	0.581514	6.35233	3.16829
Z012E0122	0.93497	0.555315	0.389344	6.51414	0.440838	2.02298	0.498857	7.51448	3.55889
Z012E0123	0.934005	0.448243	0.144396	3.74595	0.364139	3.55556	0.639848	9.77077	4.99612
Z012E0124	0.941761	0.369925	0.207488	2.82335	0.453097	2.60861	0.724016	6.37153	4.45053
Z012E0125	0.953902	0.376721	0.154303	2.75206	0.435793	2.98665	0.705964	7.58672	5.02341
Z012E0126	0.965983	0.429507	0.225728	2.92027	0.303882	2.49017	0.683187	5.80346	3.92145
Z012E0127	0.946441	0.489822	0.349581	2.88525	0.25234	3.47059	0.751966	7.93943	NA
Z012E0128	0.934002	0.43732	0.312112	4.60746	0.425956	2.61158	0.569227	6.84348	3.7993
Z012E0129	0.935112	0.363599	0.207865	4.38403	0.260175	3.3674	0.646591	7.79524	NA
Z012E0130	0.971753	0.405617	0.242631	1.98683	0.525252	3.86873	0.72652	9.52134	5.01182
Z012E0131	0.946932	0.392786	0.162022	4.82342	0.360418	3.48087	0.589126	9.09906	5.00406
Z012E0133	0.916426	0.579284	0.484138	5.85736	0.365364	1.64495	0.538887	6.62846	3.2695
Z012E0134	0.944072	0.862356	0.227574	2.78904	0.453215	3.24864	0.701943	7.2284	5.07152
Z012E0135	NA	NA	0.214089	7.09085	0.375823	1.62912	NA	8.83496	3.90216
Z012E0136	0.962191	0.425389	0.181898	3.10823	0.27719	NA	0.646768	11.0877	5.00224
Z012E0137	NA	NA	0.177501	4.15539	0.510701	2.7768	0.634279	7.68756	5.00675
Z012E0138	0.920686	0.355517	0.288643	8.68048	0.318622	1.69867	NA	9.08313	3.92191
Z012E0139	0.932435	0.635036	0.437343	3.84102	0.530721	1.90145	0.665609	4.63498	2.96535
Z012E0140	0.919736	0.500006	0.307408	6.56311	0.490675	1.89281	NA	7.47163	4.00485
Z012E0141	0.922751	0.537658	0.315961	5.38096	0.520018	2.55778	0.580724	7.26571	3.97758
Z012E0142	0.927689	0.510335	0.375106	5.15807	0.292862	2.23501	0.5103	7.52976	4.45362
Z012E0143	0.937874	0.466749	0.313857	4.80254	0.426427	1.88021	0.589933	5.87954	3.27389
Z012E0144	0.944779	0.440372	0.205977	4.14956	0.190243	3.14563	0.634977	8.18425	5.00291
Z012E0145	0.921958	0.404147	0.219795	5.10436	0.331302	2.68288	0.514494	7.17554	NA
Z012E0147	0.958623	0.43365	0.18542	4.11951	0.482946	3.58524	0.616869	9.52695	NA
Z012E0148	0.971788	0.44542	0.455541	5.0612	0.590624	2.92369	0.681622	8.00046	4.90675
Z012E0149	0.96468	0.390631	0.226404	2.62316	0.324129	3.24865	0.710346	7.28492	4.99879
Z012E0150	0.92416	0.529965	0.291213	6.4866	0.379909	2.24417	NA	8.12723	3.07333
Z012E0151	0.940689	0.48532	0.45417	2.11171	0.533775	1.93759	0.766255	3.74053	3.78737
Z012E0152	0.943866	0.501231	0.299658	6.17761	0.362533	2.64475	NA	7.98492	3.89117
Z012E0153	0.928506	0.507761	0.262612	6.63946	0.480793	2.41461	0.514813	8.05697	3.52252
Z012E0154	0.951346	NA	0.232296	4.76483	0.450049	3.87369	0.624417	10.7348	NA
Z012E0155	0.956717	NA	0.286266	2.71961	0.514196	2.50858	0.737963	5.79581	4.07511
Z012E0157	0.940141	0.482523	0.276992	2.69112	0.512201	1.8945	0.711031	4.53181	3.23859
Z012E0158	0.942125	NA	0.295039	2.11213	0.454854	3.35135	0.715396	7.15699	5.00194
Z012E0160	0.951536	0.461367	0.179491	3.27804	0.289539	3.25597	0.648751	8.1635	4.99838
Z012E0161	0.938638	0.508316	0.243845	2.90447	0.336605	2.90757	0.686203	6.38942	NA
Z012E0163	0.940278	0.454793	0.32377	4.52412	0.437492	2.25123	0.655216	6.11485	3.69908
Z012E0164	0.933546	0.513354	0.403499	3.81562	0.491605	2.17715	0.700286	5.59378	3.35236
Z012E0165	0.950571	0.499313	0.242047	0.770072	0.553718	2.92226	0.736056	5.35704	4.46648
Z012E0166	0.936256	NA	0.263941	2.96834	0.477837	3.2027	0.699163	7.49778	4.99813
Z012E0167	0.950589	0.386206	0.260156	3.12773	0.444229	3.45183	0.718109	8.39511	4.84074
Z012E0168	0.930198	0.400163	0.226798	1.65861	0.383331	3.03194	0.720336	6.68215	3.88992
Z012E0169	0.944769	0.379757	0.246722	2.3877	0.450986	3.51903	0.747119	8.0838	5.00115
Z012E0170	0.936996	0.434654	0.250199	6.07393	0.394074	2.59104	0.506274	7.93774	4.14925
Z012E0171	0.925018	0.551044	0.431056	5.98063	0.561119	1.83628	0.633993	6.14476	3.98491
Z012E0172	NA	0.532143	0.421711	5.58085	0.388167	2.34191	0.525328	7.08418	3.26824
Z012E0173	0.943685	0.448895	0.324316	5.60915	0.317463	2.32856	0.545116	6.99744	4.0887
Z012E0174	0.948289	0.350062	0.223959	1.76471	0.419855	2.91989	0.729014	6.59639	4.98178
Z012E0175	0.944793	0.419224	0.193305	1.6889	0.474294	2.81627	0.725224	5.86788	4.4662
Z012E0176	0.944593	0.450154	0.236731	2.41041	0.478424	2.62593	0.757811	5.33733	3.95385
Z012E0177	0.921559	0.464209	0.226616	5.68411	NA	3.29845	0.444449	10.0511	4.07283
Z012E0178	0.941027	0.492443	0.286557	5.27655	0.393845	2.77306	0.474632	7.74954	3.97462
Z012E0180	0.948323	0.476928	0.239829	2.54943	0.54703	2.23625	0.759044	5.56519	3.48628
Z012E0181	0.92226	0.576476	0.4373	5.09782	0.424737	1.95908	0.619596	5.9662	3.16198
Z012E0182	0.945588	0.41705	0.303383	2.10548	0.528938	2.60949	0.74172	5.81018	4.06984
Z012E0184	0.929204	0.434043	0.300203	6.51059	0.338069	2.63616	0.551234	8.64332	4.59746
Z012E0185	0.923493	0.453946	0.269859	4.84934	0.357457	3.12201	0.561691	8.21338	4.19266
Z012E0186	0.93585	0.39335	0.242851	5.94362	0.390723	2.58594	0.550781	8.47401	4.22932
Z012E0187	0.9495	0.355171	0.218493	3.3617	0.316416	3.17723	0.678356	7.78504	4.94863
Z012E0188	0.917001	0.450323	0.277112	6.75882	0.235498	2.09424	0.485649	8.44646	3.53592
Z012E0189	0.922496	0.572275	0.329227	5.2185	0.476711	2.14104	0.626436	6.60171	3.94547
Z012E0191	0.932726	0.352314	0.208839	4.32315	0.225266	3.49104	0.578229	9.63925	5.05717
Z012E0192	0.951507	0.318867	0.220374	3.53942	0.2622	3.50312	0.68013	10.7817	5.01834
Z012E0193	0.971057	0.498574	0.232505	3.58347	0.239566	3.11413	0.649111	7.13819	3.09444
Z012E0194	0.941438	0.405935	0.330431	3.6898	0.455401	2.24563	0.671769	5.55504	3.71308
Z012E0195	0.928004	0.501399	0.223643	5.38306	0.448929	2.80249	0.554598	7.80636	3.88272
Z012E0196	0.931497	0.480039	0.401634	5.2834	0.43232	2.08122	0.61099	6.16365	3.89422
Z012E0197	0.925929	0.351496	0.329474	3.14686	0.528644	3.2548	0.729165	7.6657	4.24453
Z012E0198	0.944323	0.491852	0.348119	2.2517	0.532226	2.00836	0.720366	4.34762	3.61533
Z012E0199	0.938497	NA	NA	2.87285	0.385184	NA	0.636934	11.403	5.00253
Z012E0200	0.929635	0.384764	0.202701	2.57636	0.424588	3.62461	0.768474	8.63485	5.03013
Z012E0231	0.942102	0.448095	0.325787	7.18805	0.27672	2.74807	0.436343	9.28535	3.06932
Z013E0001	0.965348	0.478238	0.180743	2.40426	0.328007	3.5642	0.750308	8.17266	4.21789
Z013E0002	0.933268	0.503501	0.280947	5.8128	0.483608	2.81481	0.554471	7.95085	3.71639
Z013E0003	0.962358	0.41729	0.222624	2.79335	0.633216	3.11133	0.694292	7.07422	4.01133
Z013E0004	NA	0.389368	0.268035	6.28318	0.253432	2.71822	0.50817	9.55006	3.90986
Z013E0005	0.928127	0.535428	0.388567	5.3601	0.312239	2.00076	0.530043	6.81735	3.5548
Z013E0006	0.961843	0.365102	0.176736	1.26243	0.325922	3.01567	0.76117	6.68084	4.01194
Z013E0007	0.964734	0.429254	0.208682	2.26778	0.552869	3.14266	0.767861	6.76521	4.21143
Z013E0009	0.922316	0.566359	0.40867	5.87577	0.2936	2.45127	0.558026	7.74891	3.53352
Z013E0010	0.96396	0.397723	0.230813	1.94689	0.440887	2.7322	0.760321	5.61815	3.5319
Z013E0011	0.938202	0.476037	0.323496	6.47951	0.533871	2.49786	NA	7.99769	3.87379
Z013E0013	NA	0.425324	0.327898	5.09866	0.509094	2.63848	0.58319	7.31137	3.7632
Z013E0014	0.991911	NA	0.224594	2.49354	0.382352	3.1542	0.74679	7.78321	4.33844
Z013E0015	0.967514	0.348593	0.15674	2.24609	0.480146	3.33082	0.724419	8.3159	4.46477
Z013E0016	NA	0.348696	0.264438	6.36328	0.183017	2.61615	0.466104	10.0058	4.11656
Z013E0017	0.91275	0.480923	0.288702	5.0948	0.257819	2.61471	0.470175	8.36339	3.91145
Z013E0018	0.942844	0.411764	0.156541	2.21962	0.250211	3.34801	0.747544	8.36211	4.83642
Z013E0019	0.933318	0.346626	0.174432	3.6212	0.336759	3.17657	0.553972	8.77397	4.3378
Z013E0020	0.948356	0.449646	0.191285	1.70844	0.25637	3.32463	0.754397	7.70059	3.72666
Z013E0021	0.940869	0.536135	0.409538	4.69412	0.432528	2.39734	0.635236	6.36229	3.45333
Z013E0022	0.933427	0.456869	0.312347	5.7266	0.460947	2.91932	0.591392	8.00824	3.91808
Z013E0023	NA	0.355564	0.28128	5.03336	0.376132	2.77318	0.49135	8.33743	4.15146
Z013E0024	0.963694	0.41817	0.246598	1.76078	0.361925	3.35046	0.752065	7.39806	4.85301
Z013E0025	0.946607	0.503448	0.27693	1.28477	0.547931	2.87713	0.760286	6.21979	3.93861
Z013E0026	0.947474	0.48958	0.240021	2.71465	0.360911	3.33701	0.752988	7.33023	4.49048
Z013E0027	0.941116	0.52269	0.246301	4.64062	0.358339	2.85874	0.575646	7.61965	3.75818
Z013E0028	0.94993	0.584233	0.448603	3.4827	0.280971	2.00355	0.696555	4.49941	3.339
Z013E0029	0.941317	0.415349	0.29223	5.94896	0.32079	2.46645	0.59763	8.29072	3.5411
Z013E0030	0.93906	0.373323	0.180515	1.46866	0.502641	2.97536	0.750048	6.56367	4.00406
Z013E0031	0.920417	0.518633	0.322656	4.75037	0.577073	2.66934	0.642084	6.94905	3.61614
Z013E0032	0.940666	0.612624	0.390454	3.98998	0.357537	2.19493	0.700687	5.51075	3.50751
Z013E0033	0.960278	0.53728	0.194455	2.02021	0.512954	3.5774	0.744163	7.98325	5.10431
Z013E0034	0.916245	0.502541	0.307471	6.46907	0.329895	2.55702	0.510127	8.46766	3.72312
Z013E0035	0.980334	0.486424	0.220271	1.94572	0.26403	2.89211	0.756323	6.73356	3.54825
Z013E0036	0.960446	0.400036	0.144634	2.14198	0.414548	3.83229	0.751806	9.87672	5.00964
Z013E0037	NA	0.47065	0.415078	5.82594	0.356442	2.33513	0.558102	7.59486	3.31578
Z013E0038	0.957052	0.459646	0.273265	1.6293	0.40479	2.67042	0.754887	5.05263	3.1287
Z013E0039	0.943754	0.493344	0.319509	7.69529	0.47702	2.67212	0.471703	9.41735	4.1195
Z013E0040	0.951303	NA	0.17127	2.05708	0.535721	3.17905	0.73901	7.445	4.43243
Z013E0042	0.924925	0.47296	0.339573	5.22103	0.342354	2.22793	0.528312	6.80649	3.52933
Z013E0043	0.919653	0.45968	0.292551	6.3909	0.317916	2.82718	0.452672	9.18193	3.69814
Z013E0044	0.947548	0.419733	0.171092	1.82934	0.449426	3.53257	0.76127	8.67209	4.79633
Z013E0045	0.940088	0.325135	0.194109	2.16493	0.515112	3.46833	0.731529	8.74842	4.40655
Z013E0046	0.970078	0.380168	0.168614	2.52303	0.430712	3.52888	0.75815	8.57429	4.08308
Z013E0047	0.935984	0.385756	0.189074	1.76648	0.550437	3.09776	0.744998	6.79693	3.71624
Z013E0049	0.956571	0.463497	0.21435	1.7533	0.464568	2.91532	0.755434	5.83413	3.8189
Z013E0050	0.935536	0.433181	0.38878	6.22755	0.507984	2.48008	0.529698	7.99369	3.52542
Z013E0051	0.946009	0.498148	0.138018	2.03666	0.385613	3.57959	0.760986	8.86387	4.79246
Z013E0052	0.922868	0.430415	0.360245	6.19626	0.380991	2.43383	0.564465	8.35501	3.7277
Z013E0053	0.944598	0.505365	0.317146	6.27495	0.258492	3.0238	0.47191	8.8022	3.83746
Z013E0054	0.953898	0.337083	0.197411	2.39412	0.517256	NA	0.775716	9.90215	5.1733
Z013E0055	0.922445	0.377335	0.215958	1.52433	0.520173	3.0466	0.75536	6.96282	4.00093
Z013E0056	0.93141	0.43452	0.281447	4.78023	0.465126	2.69789	0.493952	7.46983	4.00425
Z013E0057	0.958671	0.529418	0.28175	1.51668	0.23521	3.19802	0.781064	6.29624	3.8837
Z013E0059	0.934593	0.494095	0.153908	2.23023	0.286917	3.37127	0.713249	8.81558	4.74989
Z013E0060	0.926025	0.513616	0.197388	2.17018	0.412784	2.89483	0.739353	6.71933	3.76105
Z013E0061	0.949505	0.491548	0.131223	1.5765	0.338586	3.62963	0.749551	9.18981	5.00221
Z013E0062	0.951966	0.527091	0.278826	4.32067	0.277439	2.28869	0.47573	6.84826	3.35362
Z013E0063	0.947355	0.429481	0.198409	1.98218	0.330898	3.24755	0.738878	7.28059	4.01429
Z013E0065	0.954417	0.327709	0.142969	1.9059	0.279326	3.4016	0.754762	8.47876	4.65857
Z013E0066	0.956394	0.403982	0.173784	1.99272	0.447377	3.50715	0.749706	8.25968	NA
Z013E0067	0.96312	0.39247	0.156039	2.01847	0.442781	3.49751	0.741794	8.29345	4.55244
Z013E0068	0.935044	0.495519	0.285082	5.27052	0.390158	2.45519	0.567793	6.81009	3.83435
Z013E0069	0.945221	0.494176	0.220259	1.71283	0.287734	3.41153	0.758449	8.13293	4.52554
Z013E0071	0.916176	0.381585	0.348833	5.9059	0.551519	2.66469	0.566981	8.23912	3.63838
Z013E0072	0.950554	0.450908	0.223872	1.59651	0.390823	3.44719	0.760702	8.03636	4.09293
Z013E0073	0.929839	0.393841	0.363305	6.75467	0.324193	2.60292	0.524733	8.73181	4.14848
Z013E0074	0.936693	0.48291	0.257134	5.34711	0.269779	2.80561	0.511809	8.35035	3.89297
Z013E0075	0.957664	0.497749	0.197034	2.56237	0.567686	3.57612	0.726796	8.52275	4.92969
Z013E0076	0.930799	0.468225	0.293839	5.05021	0.658794	2.69556	0.537905	7.62729	3.54623
Z013E0077	0.961222	0.414106	0.204539	1.49334	0.552524	2.74158	0.75713	5.55071	3.82809
Z013E0078	0.94827	0.478757	0.3387	6.46537	0.410947	2.29607	0.563369	7.48503	3.35823
Z013E0079	0.937742	0.450542	0.250743	2.61114	0.526327	3.28125	0.733002	7.2195	4.5232
Z013E0080	0.944124	0.436426	0.305136	4.68181	0.629998	2.62733	0.57452	6.99794	3.55146
Z013E0081	0.948045	0.405257	0.240198	1.82078	0.585767	3.16569	0.754414	6.64741	3.92526
Z013E0082	0.947129	0.401459	0.23354	2.29266	0.545671	3.19724	0.772273	6.96945	4.32573
Z013E0083	0.950081	0.43064	0.221509	1.54349	0.426802	3.01552	0.773907	6.20095	4.28496
Z013E0084	0.958728	NA	0.148323	1.83755	0.3148	3.36308	0.736867	8.4773	4.19041
Z013E0085	NA	0.414969	0.247493	5.89631	0.457764	2.86603	0.506339	8.73281	4.15027
Z013E0086	0.932389	0.452335	0.221484	4.23176	0.475717	2.82905	0.74309	7.43923	3.653
Z013E0087	0.937834	0.556399	0.34201	5.15256	0.585988	2.52103	0.583488	6.91789	3.54587
Z013E0088	0.967084	0.351554	0.220102	1.78813	0.229413	3.2069	0.768738	7.38294	3.89238
Z013E0089	0.955772	0.323502	0.184955	2.61269	0.370542	3.56073	0.765988	8.83719	5.12584
Z013E0090	0.933944	0.586713	0.379983	4.87814	0.611127	2.74116	0.580659	6.74448	3.5448
Z013E0091	0.929154	0.566677	0.284442	5.16262	0.340341	2.7336	0.5416	7.29736	3.99573
Z013E0092	0.930472	0.339455	0.36166	5.48138	0.547236	2.52136	0.492263	7.86478	3.75624
Z013E0093	0.928902	0.508824	0.324141	5.59256	0.399452	2.82639	0.528327	8.81064	3.76104
Z013E0094	0.924642	0.44637	0.348092	5.44725	0.522463	2.65431	0.586787	7.33218	3.35378
Z013E0095	0.939299	0.494276	0.216523	2.2536	0.503753	3.33917	0.762598	7.59156	4.41187
Z013E0096	NA	0.383503	0.239572	5.26836	0.368006	2.73067	0.536159	8.34454	3.76
Z013E0097	0.95371	0.390518	0.252147	2.35052	0.521578	3.27443	0.724967	7.57161	4.28683
Z013E0098	0.918949	0.436828	0.268904	6.81676	0.188078	2.78755	0.48002	9.71335	3.89975
Z013E0099	0.954306	0.509742	0.460755	3.19995	0.351105	3.25083	0.707905	8.18502	4.80767
Z013E0100	0.951681	0.380037	0.173289	2.22404	0.489988	3.14313	0.734165	7.19238	4.40645
Z013E0101	0.914868	0.508189	0.389749	5.70776	0.623339	2.57281	0.592497	7.21191	3.43033
Z013E0102	0.931979	0.478817	0.436021	5.0402	0.411888	2.36134	0.592826	6.67894	3.72253
Z013E0103	0.950419	0.363498	0.196967	1.69279	0.602121	3.39865	0.761103	7.82094	4.11714
Z013E0104	0.938213	0.462765	0.359039	5.09759	0.390072	2.21487	0.539686	6.80908	3.14549
Z013E0105	0.942339	0.507265	0.253198	5.76703	0.290675	2.92536	0.462021	8.83169	3.76225
Z013E0106	0.926182	0.430044	0.238941	6.44121	0.365756	2.61617	0.450239	9.30233	4.11779
Z013E0107	0.94734	0.528428	0.288976	4.85822	0.320573	3.06062	0.494843	8.48809	3.9201
Z013E0108	0.95177	0.432593	0.198071	5.02127	0.399487	3.11457	0.524833	8.53278	3.75563
Z013E0110	NA	0.438203	0.263385	7.33655	0.477239	2.82562	0.484781	9.73191	4.28142
Z013E0111	0.964495	0.481539	0.211295	4.93186	0.534435	2.88155	0.552381	7.73949	3.76213
Z013E0112	0.935216	0.530006	0.360884	5.9584	0.306089	2.43144	0.521771	7.54483	3.9011
Z013E0113	0.933226	0.577889	0.343625	4.84886	0.454877	2.25427	0.585817	6.14048	3.54103
Z013E0114	0.949993	0.338678	0.144013	2.11399	0.280872	3.61756	0.749743	9.24231	5.18677
Z013E0115	0.937827	0.457194	0.358074	4.19171	0.593193	2.29382	0.558049	5.94418	3.2449
Z013E0116	0.958706	0.496703	0.305453	3.97765	0.426159	2.60465	0.599545	6.32309	3.35272
Z013E0117	0.944595	0.580481	0.311938	3.57078	0.506081	2.77929	0.715301	5.95852	3.99322
Z013E0118	0.939173	0.503787	0.221372	6.32699	0.286102	2.65144	0.427953	9.05891	4.14887
Z013E0119	0.951457	0.458067	0.237749	2.41241	0.502195	3.31236	0.753692	7.42254	4.7898
Z013E0120	0.955235	0.422215	0.161771	2.21542	0.237472	3.68226	0.766247	9.18184	5.00497
Z013E0122	0.928547	0.548633	0.2753	6.02851	0.571712	2.50647	0.547148	7.71368	3.71621
Z013E0123	0.927621	0.405191	0.223205	5.89303	0.337954	2.82647	0.544569	8.70669	4.00842
Z013E0124	0.967587	0.367573	0.164467	2.53678	0.373439	3.65507	0.733078	9.10068	4.82874
Z013E0125	0.925727	0.406125	0.219889	6.07389	0.415029	2.64747	0.470859	8.65812	4.3388
Z013E0126	0.946704	0.427422	0.226501	5.02596	0.502888	2.93993	0.562089	8.10307	3.4178
Z013E0127	0.951728	0.603847	0.282745	6.41132	0.390029	2.52054	0.500803	8.15368	3.72987
Z013E0128	0.949279	0.515588	0.24842	2.11468	0.395511	2.91892	0.754003	6.41697	3.95901
Z013E0129	0.943512	0.400758	0.203059	2.02241	0.474132	3.15945	0.767724	7.23769	3.99414
Z013E0130	0.939332	0.314683	0.130284	1.92411	0.391421	3.70853	0.767878	9.56639	5.00168
Z013E0131	0.94476	0.435097	0.265812	5.02386	0.437438	2.75092	0.494291	7.73336	4.12017
Z013E0132	0.932351	0.331388	0.163854	1.72142	0.53768	3.09477	0.771088	7.29781	4.5031
Z013E0133	0.955052	0.479674	0.230792	3.38081	0.341919	3.18579	0.6556	7.45179	4.33619
Z013E0134	0.910385	0.47456	0.359767	5.60304	0.560967	2.33629	0.575594	7.40234	3.5241
Z013E0208	0.956714	0.495505	0.346048	5.42389	0.488614	2.09267	0.560094	6.8901	2.92656
Z013E0211	0.916793	0.423774	0.315546	6.4112	0.48974	2.41612	0.504987	8.18288	3.91113
Z013E0222	0.9464	0.334036	0.16169	1.10566	0.551414	3.48713	0.760747	8.32949	4.09079
Z013E0226	0.914064	0.346271	0.294409	6.80897	0.386655	2.72035	0.493828	9.39989	4.03592
Z013E0242	0.961461	0.369692	0.145732	2.28403	0.301552	3.83186	0.768516	9.63386	5.17281
Z013E0247	0.958498	0.401609	0.17266	1.85146	0.436666	3.35362	0.735987	7.7641	4.48941
Z020E0001	0.93789	0.530852	0.38536	6.16734	0.371611	1.27793	0.496776	6.66841	3.01811
Z020E0002	0.957056	0.576692	0.389883	2.28459	0.300404	0.835479	0.668257	3.20951	1.95812
Z020E0004	0.934775	0.360544	0.191672	4.17314	0.325121	1.65122	0.605422	6.5623	3.99335
Z020E0005	0.952073	0.536369	0.313454	6.27469	0.25623	1.68231	0.538904	6.89403	3.10737
Z020E0006	0.945918	0.513317	0.284986	6.2997	0.357052	2.45011	0.546433	7.67419	3.84809
Z020E0007	0.952273	0.421561	0.35889	2.85276	0.236343	1.47986	0.50365	5.24703	3.12693
Z020E0008	NA	0.460783	0.311645	3.66344	0.357861	1.49637	NA	5.74315	3.09787
Z020E0009	0.956802	0.46453	0.284225	2.47711	0.437192	1.17155	0.720957	3.83801	2.8294
Z020E0010	0.941275	0.534998	0.374334	4.51163	0.284715	1.12445	0.562108	5.57664	3.40038
Z020E0011	0.947111	0.524734	0.361863	5.00865	0.268954	2.00368	0.565295	6.59583	3.4008
Z020E0012	0.935889	0.546363	0.374202	4.65258	0.421621	2.183	0.555873	6.23031	3.36928
Z020E0013	0.942552	0.489072	0.307139	3.31871	0.41149	1.54022	0.503433	5.45412	3.18936
Z020E0014	0.95692	0.532628	0.273202	2.8758	0.361842	2.02168	0.690542	4.61286	3.40059
Z020E0015	0.953134	0.475282	0.270748	4.14086	0.33637	1.30621	0.630555	5.10065	2.97467
Z020E0016	0.94512	0.499802	0.309104	5.46175	0.371947	2.21788	0.46228	7.15648	4.33286
Z020E0017	0.942479	0.531894	0.18905	5.76474	0.339238	2.22663	0.658035	7.60623	4.2633
Z020E0018	0.952833	0.426034	0.254194	1.98318	0.363958	0.829145	0.654924	3.77607	2.84206
Z020E0019	0.932391	0.569725	0.35938	4.46126	0.435196	1.54288	0.59196	5.44923	3.03503
Z020E0021	0.946562	0.431258	0.222495	3.65447	0.339742	2.89823	0.661558	6.85182	NA
Z020E0022	0.958899	0.553062	0.323524	1.79752	0.377439	1.14604	0.697311	3.20193	2.49525
Z020E0023	0.946368	0.535017	0.363053	2.44502	0.22975	0.813809	0.478304	4.40748	2.93688
Z020E0025	0.959662	0.517656	0.329274	2.25763	0.387566	1.13239	0.715648	3.36858	2.34289
Z020E0027	0.94849	0.538024	0.421234	3.52012	0.320957	1.14826	0.598411	4.45966	2.44264
Z020E0028	0.94296	0.50907	0.295486	6.67256	0.330283	2.39864	0.531916	8.1089	3.1173
Z020E0030	0.953137	0.497086	0.320169	3.26856	0.290941	1.76509	0.538574	5.05877	2.92256
Z020E0031	0.954821	0.502833	0.31666	2.52812	0.278278	1.2372	0.696146	3.94293	2.75074
Z020E0032	0.959538	0.491989	0.258064	1.72485	0.388974	0.931201	0.710107	3.20264	2.55601
Z020E0033	0.950303	0.558405	0.382373	2.52319	0.403096	1.31043	0.619376	4.24721	2.28073
Z020E0035	0.940389	0.445	0.30609	3.33664	0.43876	2.39926	0.683738	5.44135	2.75468
Z020E0036	0.958745	0.409716	0.284031	2.56693	0.364723	1.07563	0.589846	4.19828	3.12707
Z020E0037	0.931405	0.534351	0.355066	4.10932	0.312041	1.99686	0.477596	6.38345	3.41226
Z020E0038	0.959569	0.513467	0.298697	4.72703	0.301019	2.41876	0.519225	6.92028	3.40037
Z020E0040	0.948781	0.496782	0.26905	2.38013	0.410595	1.20174	0.622668	4.11127	NA
Z020E0041	0.943595	0.514911	0.30049	7.22632	0.369509	2.64364	0.550983	8.32936	NA
Z020E0042	0.955246	0.454606	0.252287	3.40204	0.380151	2.65307	0.662569	6.16089	3.76226
Z020E0043	0.954042	0.585405	0.457179	3.86534	0.382914	1.29365	0.682062	4.4386	2.22745
Z020E0044	0.951657	0.52766	0.276224	2.34356	0.405991	1.46858	0.703083	4.05464	NA
Z020E0045	0.953351	0.411525	0.203337	2.82297	0.334626	1.43295	0.625732	5.12136	3.08224
Z020E0046	0.957229	0.578592	0.293264	2.57702	0.413683	2.30489	0.694736	4.87715	3.75116
Z020E0047	0.953444	0.520738	0.347404	2.64971	0.388086	1.29627	0.584264	4.32584	2.52036
Z020E0048	0.960561	0.503736	0.289269	1.4659	0.428235	1.49892	0.692465	3.49704	2.37218
Z020E0049	0.934155	0.499882	0.332605	3.34481	0.218169	1.86858	0.59545	5.21164	2.9811
Z020E0050	0.945744	0.427907	0.283288	1.79849	0.372162	1.21799	0.704675	3.61634	2.70539
Z020E0052	0.938146	0.489211	0.401191	2.91529	0.319095	1.2455	0.532105	4.93519	4.29899
Z020E0053	0.933078	0.511877	0.343121	2.97506	0.288922	1.4469	NA	4.82222	2.88721
Z020E0054	0.964178	0.583332	0.211697	2.4977	0.338208	2.36145	0.695133	5.30742	3.57416
Z020E0055	0.954293	0.623111	0.454489	1.45583	0.446904	0.922583	0.67535	2.50574	1.64545
Z020E0056	0.964625	0.517292	0.296231	2.5586	0.397249	1.34824	0.707669	3.46867	2.17642
Z020E0057	0.957469	0.495488	0.285096	2.45486	0.381796	2.90038	0.708841	6.49071	4.34722
Z020E0058	0.941217	0.528077	0.404557	2.80136	0.431608	1.01413	0.558085	4.49227	2.83601
Z020E0059	0.959157	0.55301	0.366413	2.19459	0.308281	1.77426	0.600423	4.26359	3.67042
Z020E0060	0.951844	0.514398	0.3271	2.91861	0.46136	1.91111	0.698905	4.47463	3.39396
Z020E0061	0.934581	0.514379	0.342265	3.15012	0.42378	1.15105	0.582172	4.70561	3.1939
Z020E0063	0.953128	0.55617	0.383319	3.94716	0.328043	1.94312	0.574634	5.3157	2.7557
Z020E0064	0.940282	0.514647	0.337978	2.54794	0.353129	1.37939	0.524592	4.85172	3.19165
Z020E0065	0.948607	0.512658	0.36594	5.00381	0.427859	2.22335	0.579055	6.16099	NA
Z020E0066	0.961092	0.473454	0.297875	2.42104	0.380803	1.80038	0.639597	4.30252	3.13099
Z020E0067	0.940159	0.425171	0.274707	3.24016	0.40519	2.45646	0.647598	6.27044	3.60393
Z020E0068	0.95562	0.534929	0.315049	2.26286	0.366738	2.06302	0.617906	4.73515	3.491
Z020E0069	0.958679	0.406083	0.224875	2.16663	0.360611	1.2658	0.680178	4.17144	3.49424
Z020E0070	0.958787	0.509296	0.321826	1.01709	0.423634	1.18659	0.7161	2.54023	2.18135
Z020E0071	0.940079	0.516427	0.361522	5.3103	0.400947	1.34618	0.544439	6.32453	3.48645
Z020E0073	0.930713	0.49437	0.311832	5.95179	0.220449	1.5994	0.54401	7.07763	3.60073
Z020E0074	0.945873	0.481957	0.300171	2.40983	0.375762	1.54144	0.569463	4.8134	3.11161
Z020E0075	0.963114	0.498166	0.24105	1.4944	0.442673	1.85308	0.724342	4.03565	2.56253
Z020E0076	0.937803	0.51605	0.370144	4.30975	0.403926	1.36242	0.60645	5.34483	3.15787
Z020E0077	0.944683	0.515094	0.324981	4.62356	0.379475	2.20295	0.563399	6.17649	3.02772
Z020E0078	0.958195	0.487124	0.276954	1.83121	0.291106	1.87036	0.669634	4.58464	2.93783
Z020E0079	0.956793	0.497253	0.266613	5.0299	0.259117	2.50677	0.608403	7.09613	3.75165
Z020E0080	0.953664	NA	0.313915	2.66951	0.207768	1.32221	0.688702	4.34366	3.09607
Z020E0081	0.93898	0.544543	0.344584	5.83979	0.298481	2.12793	0.568656	7.22384	2.88944
Z020E0083	0.929838	0.558082	0.388682	1.86253	0.455958	0.905963	0.591078	3.33522	2.44044
Z020E0084	0.947013	0.550984	0.381895	3.0754	0.426313	1.41055	0.587288	4.19253	2.48314
Z020E0085	0.951937	0.527124	0.290332	2.62109	0.307515	1.63595	0.567559	4.71274	2.51678
Z020E0086	0.937969	0.444455	0.32705	5.55753	0.411416	2.47569	0.62134	6.93985	3.60664
Z020E0087	0.955779	0.450376	0.24693	3.21775	0.422287	2.73046	0.710075	5.93977	3.49169
Z020E0088	0.93864	0.417846	0.210026	2.70293	0.308259	1.76807	0.644243	5.02068	3.60367
Z020E0089	0.948813	0.581179	0.406916	2.46809	0.218903	1.45009	0.604164	4.12459	2.82889
Z020E0090	0.953195	0.564289	0.39887	2.45534	0.431902	1.45503	0.622114	3.9509	2.61245
Z020E0091	0.945249	0.592086	0.403346	2.5764	0.338738	1.49712	0.608877	4.20719	2.70986
Z020E0092	0.964864	0.537481	0.350797	2.20233	0.447133	0.958435	0.716167	3.15805	2.58897
Z020E0093	0.960765	0.552868	0.444186	4.57156	0.395622	1.03153	0.57334	5.65458	2.75739
Z020E0094	0.958107	0.483208	0.220726	2.39098	0.303641	2.06777	0.65725	5.59908	3.38588
Z020E0095	0.957277	0.503368	0.315072	1.8116	0.363959	1.13023	0.693597	3.17124	2.50316
Z020E0096	0.947764	0.502451	0.318191	2.27742	0.398733	1.05515	0.681597	4.00081	NA
Z020E0098	0.937945	0.551273	0.327989	2.38727	0.408143	1.42833	0.534255	4.48869	2.90552
Z020E0099	0.938564	0.510328	0.321405	5.87559	0.322842	2.48809	0.508135	7.97278	4.25556
Z020E0100	0.959345	0.531787	0.281779	2.30172	0.252405	1.22637	0.675989	4.08843	3.39891
Z020E0101	NA	0.538174	0.319949	6.50647	0.466786	2.51643	NA	8.40763	3.39802
Z020E0102	0.940057	0.511332	0.270776	3.17785	0.354347	1.42676	0.670869	4.79748	3.18649
Z020E0103	0.950063	0.439779	0.2273	3.65884	0.406343	2.96391	0.68578	7.11885	NA
Z020E0104	0.941876	0.478268	0.26377	5.62033	0.280061	2.0617	0.510316	7.27051	4.16536
Z020E0105	0.937337	0.458726	0.20685	4.55443	0.316437	2.76757	0.596214	7.78319	3.69665
Z020E0106	0.931923	0.600155	0.395923	5.4013	0.365836	1.36799	0.520606	6.08479	2.90659
Z020E0107	0.941844	0.50578	0.296332	6.01071	0.355494	2.51269	0.439435	8.16219	3.94056
Z020E0108	0.955848	0.448593	0.246913	1.97215	0.311299	0.874941	0.667992	4.31714	2.74781
Z020E0109	0.956504	0.472801	0.332898	3.52837	0.302402	2.63246	0.662573	6.43249	4.09237
Z020E0110	0.959955	0.546018	0.45472	2.37545	0.282076	1.33678	0.642094	4.34803	2.27961
Z020E0111	0.939415	0.48699	0.387719	4.36599	0.29535	1.20106	0.531597	5.66136	4.10837
Z020E0112	0.953626	0.450034	0.227543	3.29406	0.343635	2.76794	0.599621	6.49647	4.30274
Z020E0113	0.938264	0.517008	0.293078	4.29041	0.366728	2.0983	0.598013	6.18483	3.21703
Z020E0114	0.945151	0.528931	0.243728	2.93312	0.392919	2.36335	0.67192	5.46782	3.12337
Z020E0115	0.946056	0.525476	0.417538	2.79868	0.344344	1.15465	0.561649	4.6387	3.60213
Z020E0116	0.938096	0.495716	0.388135	5.28239	0.360668	1.28311	0.532759	6.37643	3.10427
Z020E0118	0.962181	0.498472	0.203462	2.43939	0.381007	2.956	0.705736	6.58901	4.34024
Z020E0119	0.962423	0.474524	0.294581	2.25319	0.350656	1.15082	0.649527	3.72148	4.04944
Z020E0120	0.954646	0.55367	0.338104	5.30454	0.308011	2.47942	0.593346	6.80442	3.13338
Z020E0121	0.94766	0.54248	0.370465	3.09287	0.368061	1.54541	0.518067	4.8007	3.40034
Z020E0122	0.949058	0.503591	0.431211	2.08037	NA	0.363929	0.559966	4.15411	2.27742
Z020E0123	0.954346	0.464701	0.241249	2.31801	0.386054	1.24044	0.718079	3.79227	2.82395
Z020E0124	0.947261	0.495932	0.400456	5.90641	0.382219	1.27929	0.58527	6.03511	2.7406
Z020E0125	0.961637	0.513411	0.26239	1.80587	0.414333	2.05569	0.6903	4.7704	NA
Z020E0126	0.943638	0.517904	0.35663	2.22111	0.355917	1.21933	0.644274	4.1013	2.52134
Z020E0128	0.954719	0.470424	0.326561	1.62609	0.28339	0.971817	0.658233	3.45932	2.22105
Z020E0131	0.935673	0.494131	0.300952	2.21416	0.405824	1.13371	0.695545	3.8991	2.75
Z020E0132	0.931689	0.393503	0.341329	3.70021	0.355563	2.3733	0.664107	6.64239	2.75912
Z020E0133	0.946508	0.553533	0.423908	4.7042	0.344937	2.21815	0.593944	5.88	2.96046
Z020E0134	0.935327	0.549854	0.363249	4.85997	0.336002	1.33786	0.587038	5.46969	2.68888
Z020E0135	0.957634	0.444	0.251362	2.53599	0.318071	1.41606	0.69644	4.25513	3.32518
Z020E0136	0.958245	0.37719	0.209062	2.89777	0.324445	2.46413	0.684723	5.08303	NA
Z020E0137	0.958269	0.519139	0.218009	1.07158	0.44227	2.00504	0.70882	4.17677	3.07279
Z020E0138	0.938636	0.572482	0.362668	2.68565	0.404619	0.975125	0.567939	3.89473	2.6994
Z020E0139	0.954536	0.494652	0.327287	1.86447	0.409388	0.822362	0.68352	3.29024	2.27857
Z020E0140	0.958012	0.487382	0.388148	2.84385	0.340129	1.30345	0.696258	3.87558	2.61548
Z020E0141	0.94969	0.498488	0.33134	3.59736	0.370592	0.882869	0.63936	4.73912	2.75095
Z020E0142	0.96047	0.448461	0.364947	0.627751	0.400311	1.05304	0.7522	2.49223	2.1792
Z020E0144	0.953051	0.536707	0.367004	2.33677	0.285169	1.3595	0.542695	4.54809	2.90322
Z020E0145	0.962899	0.535904	0.293274	2.77723	0.38299	1.0999	0.700899	3.89269	2.75136
Z020E0146	0.957384	0.518988	0.251492	2.8483	0.312036	1.36874	0.662871	4.56382	2.52029
Z020E0147	0.954532	0.51263	0.301365	2.71356	0.401617	2.54397	0.699847	5.27313	3.56892
Z020E0148	0.944533	0.532636	0.445334	5.00985	0.427612	1.24313	0.632514	5.46249	3.18877
Z020E0149	0.958625	0.509917	0.349909	2.78321	0.398524	1.1549	0.695535	3.76421	2.75143
Z020E0150	0.936441	0.548887	0.353987	2.5625	0.414703	1.45601	0.582153	4.12976	2.71578
Z020E0151	0.944927	0.533326	0.396826	3.17148	0.29333	1.19004	0.541766	5.08349	2.87812
Z020E0152	0.954335	0.555761	0.390989	2.30781	0.327136	1.18181	0.616652	3.44004	2.35708
Z020E0153	0.95901	0.423991	0.264966	3.30102	0.386304	1.50765	0.686992	4.89408	2.93184
Z020E0155	0.946462	0.513851	0.248385	3.9515	0.327149	1.593	0.584415	5.66375	3.60451
Z020E0156	0.954082	0.509086	0.285837	2.28183	0.348161	1.22227	0.694643	4.04536	2.83452
Z020E0157	0.945144	0.546511	0.404574	2.88528	0.273252	0.808992	0.499173	4.49827	3.1148
Z020E0158	0.959712	0.405714	0.22783	3.22418	0.220129	3.05722	0.691702	6.92027	4.30777
Z020E0160	0.942152	0.535146	0.369223	3.0891	0.396506	1.23204	0.516973	4.63488	2.75136
Z020E0161	0.964986	0.535405	0.308993	1.54566	0.289423	1.26185	0.73707	2.84865	2.05788
Z020E0162	0.953285	0.500488	0.359657	2.40222	0.438962	1.25197	0.703336	3.64174	2.85484
Z020E0163	0.940169	0.480375	0.446464	3.99553	0.314334	0.8362	0.577371	4.92106	2.75136
Z020E0164	0.928569	0.539181	0.33401	6.59233	0.289442	1.35417	0.53756	7.4229	3.33466
Z020E0165	0.944875	0.543553	0.319793	3.00497	0.397647	1.73249	0.597621	4.76256	2.5227
Z020E0167	0.950543	0.544319	0.392859	4.35809	0.416236	1.14622	0.603926	4.88681	2.75164
Z020E0168	0.941979	0.498715	0.398705	7.76638	0.335643	1.19526	0.55244	7.77024	4.12684
Z020E0169	0.942284	0.521781	0.386789	5.98781	0.262015	1.20462	0.541721	6.68973	3.39373
Z020E0170	0.944114	0.504481	0.388605	2.66057	0.275962	1.07408	0.493703	4.47574	3.47872
Z020E0171	0.962357	0.476138	0.312232	1.94286	0.231171	1.4715	0.572431	4.43522	2.66204
Z020E0172	0.952148	0.461	0.257615	1.92048	0.328157	1.85102	0.654769	4.63524	2.97243
Z020E0173	0.948839	0.551725	0.368562	2.33933	0.36137	1.35337	0.576746	3.91953	2.67948
Z020E0175	0.960192	0.597717	0.369683	1.87493	0.351502	1.11239	0.628566	2.89182	1.97673
Z020E0176	0.952481	0.508373	0.287477	4.10374	0.271794	1.98216	0.608396	5.95131	3.09879
Z020E0179	0.965752	0.506993	0.26382	2.54042	0.312882	1.31479	0.641819	4.73723	2.96718
Z020E0180	0.958827	0.452545	0.236557	1.90593	0.343383	1.1092	0.696373	3.89839	2.80245
Z020E0181	0.943422	0.520184	0.267198	5.2465	0.330381	2.01397	0.588382	6.68233	NA
Z020E0182	0.957379	0.563165	0.344001	2.58605	0.370597	1.62215	0.536669	4.52921	2.74958
Z020E0185	0.948988	0.58691	0.499707	3.50181	0.287904	0.754498	0.606101	2.97711	2.75506
Z020E0186	0.955623	0.556228	0.313156	1.91329	0.293225	1.12093	0.692017	3.31782	3.00479
Z020E0187	0.952984	0.50292	0.274573	1.47086	0.426172	2.0552	0.671316	4.12667	3.72521
Z020E0188	0.961575	0.601087	0.420822	2.77271	0.428719	1.26146	0.630118	4.10739	2.27974
Z020E0189	0.951324	0.419791	0.324904	3.56264	0.353786	2.76706	0.653931	6.57164	NA
Z020E0190	0.928896	0.402306	0.246612	5.0631	0.247431	2.53124	0.602362	7.34322	3.68222
Z020E0191	0.965077	0.568922	0.314921	1.34149	0.297064	1.47003	0.708419	3.89381	2.74987
Z020E0192	0.931579	0.50933	0.351517	5.16292	0.349041	1.40688	0.498324	6.58855	3.33093
Z020E0194	0.952987	0.553895	0.40646	3.95546	0.37274	1.01021	0.641986	4.67698	2.71643
Z020E0195	0.95827	0.506072	0.295757	3.04024	0.281788	1.63256	0.59198	4.8027	2.90413
Z020E0196	0.962288	NA	0.336768	1.3068	0.324352	1.03238	0.604908	3.62563	2.89186
Z020E0197	0.941235	0.507822	0.303767	6.54946	0.379783	2.40056	0.516924	7.83526	4.16323
Z020E0198	0.951037	0.523464	0.372626	6.59499	0.398293	1.42204	0.545366	6.95227	3.75889
Z020E0199	0.940913	0.529418	0.39556	4.10871	0.33658	1.47811	0.591278	5.07568	3.19343
Z020E0200	0.936823	0.46461	0.42393	3.61057	0.393304	0.943525	0.552551	4.79434	3.15134
Z020E0232	0.9345	0.372866	0.346332	2.39503	0.225344	1.79411	0.614867	5.02257	1.75365
Z020E0234	0.959642	0.448984	0.267544	1.91689	0.229585	1.8863	0.685851	4.6255	3.60231
Z021E0002	0.921016	0.511514	0.325787	5.12303	0.197907	2.19274	0.407697	7.82061	3.94128
Z021E0003	0.92686	0.577087	0.42108	4.15888	0.267426	1.97551	0.473083	6.42704	3.54285
Z021E0004	0.958775	0.451104	0.311122	5.00894	0.341715	2.39973	0.420936	7.484	4.13361
Z021E0005	0.921415	0.474958	0.388682	5.78926	0.433578	2.06969	0.555738	6.82619	3.6279
Z021E0007	0.923326	0.518394	0.300848	5.45974	0.312708	2.5355	0.473172	7.64481	3.94186
Z021E0008	0.931459	0.532393	0.375603	4.94772	0.205421	2.34477	0.459332	7.38341	4.13431
Z021E0009	0.931772	0.512942	0.261936	4.89141	0.406599	2.39957	0.393032	7.80914	3.90597
Z021E0010	NA	0.495587	0.380936	4.67562	0.390176	1.8905	0.515135	6.4827	2.90701
Z021E0011	0.926524	0.559836	0.394406	4.25912	0.465252	2.19131	0.522186	6.06991	3.64787
Z021E0012	0.959518	0.581517	0.339502	5.29104	0.447423	2.29008	0.505754	6.79567	3.3352
Z021E0013	0.915427	0.479085	0.383262	4.58061	0.498709	2.33203	0.468291	7.0063	3.54256
Z021E0014	NA	0.469303	0.306303	3.89178	0.281419	2.51317	0.453611	7.48757	NA
Z021E0015	0.922145	0.497113	0.378306	4.10558	0.425165	1.83666	0.519511	5.98533	2.9067
Z021E0016	0.943404	0.490309	0.331651	4.85659	0.405595	2.30396	0.582833	6.17893	3.33645
Z021E0017	0.938619	0.567017	0.304614	4.43054	0.408367	2.38265	0.455324	6.73195	3.33736
Z021E0019	NA	0.450587	0.336202	4.53048	0.395133	2.31617	0.438642	7.41289	3.94128
Z021E0020	NA	0.450911	0.327654	4.54372	0.459457	2.20896	0.569209	6.87351	3.33579
Z021E0022	0.95229	0.453001	0.326668	4.15648	0.349027	2.31681	0.467501	6.5204	3.33549
Z021E0023	0.931853	0.498728	0.337016	5.86177	0.368221	2.19287	0.521882	6.98869	3.94025
Z021E0024	0.928854	0.496997	0.314403	3.91636	0.46284	2.1308	0.475689	6.17043	3.01343
Z021E0025	0.932154	0.435189	0.26555	3.56053	0.211513	2.37624	0.48503	6.78134	3.31691
Z021E0026	0.937378	0.399526	0.37181	5.09588	0.282766	2.21415	0.493803	7.28471	3.21676
Z021E0027	0.922503	0.504624	0.309251	4.37626	0.419862	2.27113	NA	7.18501	3.71669
Z021E0028	0.931067	0.424648	0.325754	5.69991	0.350705	2.52606	0.463216	7.9741	3.91771
Z021E0029	0.925622	0.451541	0.266202	3.41113	0.30207	2.19885	0.484296	6.50547	3.74331
Z021E0030	0.921268	0.447544	0.359266	6.18696	0.214788	2.46734	0.47982	8.17503	2.90971
Z021E0031	0.915256	0.471386	0.380778	6.25438	0.475047	2.39411	0.496094	7.68602	4.1087
Z021E0032	0.988429	0.666711	0.353076	5.56554	0.561157	2.24662	0.510546	6.4865	3.33637
Z021E0033	0.928135	0.405891	0.263392	4.95612	0.280889	2.30498	0.53244	7.08547	3.53701
Z021E0034	0.934872	0.528063	0.350256	3.45525	0.421922	1.9876	0.493987	5.61936	3.01134
Z021E0035	0.921406	0.438894	0.24713	5.22248	0.453411	2.60029	0.525247	7.55678	3.94327
Z021E0037	0.929735	0.464992	0.336791	4.19852	0.283841	2.2868	0.447561	7.09914	3.43384
Z021E0038	NA	0.506874	0.295788	4.42693	0.350737	2.13873	0.422443	7.44419	3.54362
Z021E0039	0.929314	0.418406	0.274163	5.90545	0.246406	2.92463	0.513832	8.65827	NA
Z021E0040	0.939042	0.507269	0.398159	4.03316	0.455299	2.15119	0.552149	5.62059	3.93905
Z021E0042	0.928293	0.421927	0.360258	4.62742	0.345473	2.34411	0.411087	7.41332	3.74364
Z021E0043	0.921099	0.458572	0.305036	4.37142	0.350872	2.3601	0.401406	7.65422	4.37612
Z021E0044	NA	0.422992	0.254592	4.91507	0.265331	2.41001	0.427127	8.21715	4.13527
Z021E0045	0.935462	0.454549	0.380093	5.11586	0.468295	2.43083	0.634332	6.34465	3.71884
Z021E0046	0.926752	0.461884	0.351768	4.93578	0.274569	2.34111	0.42827	7.79793	3.74357
Z021E0047	0.929645	0.508384	0.40402	4.41757	0.435192	1.94356	0.52594	6.19856	2.90951
Z021E0048	0.939116	0.469706	0.300909	4.75842	0.33723	2.28816	0.504567	6.8613	3.94031
Z021E0049	0.948244	0.496641	0.322459	5.26127	0.440183	2.38716	0.588491	6.65201	3.94023
Z021E0051	0.943134	0.56863	0.412104	4.32608	0.525202	1.64792	0.511661	5.20077	2.90406
Z021E0052	0.949201	0.561159	0.311204	4.37335	0.421713	2.23793	0.426211	6.81104	3.33634
Z021E0053	0.942422	0.561317	0.311857	5.84804	0.387155	2.34237	0.478928	7.22209	3.54249
Z021E0054	0.96988	0.596323	0.319253	4.8989	0.502505	2.57979	0.550012	6.30437	3.33563
Z021E0055	0.932835	0.552085	0.415022	4.56038	0.472899	1.91426	0.646042	5.41425	2.90779
Z021E0056	0.944277	0.498494	0.337378	3.94416	0.409058	2.21679	0.471795	6.4411	3.45476
Z021E0057	0.922369	0.469305	0.285519	6.05461	0.246671	2.51493	0.462976	8.32118	3.6289
Z021E0058	0.999475	0.617828	0.308881	3.9229	0.437225	2.47814	0.467897	6.0559	3.34595
Z021E0059	0.938743	0.462468	0.278055	4.64115	0.376509	2.52662	0.600212	6.97843	3.63096
Z021E0060	0.928391	0.484624	0.348573	5.47554	0.326813	2.38685	0.48354	7.71672	3.91297
Z021E0061	0.932283	0.489811	0.31615	5.82295	0.359093	2.47031	0.520955	7.7827	3.75078
Z021E0062	0.93163	0.529061	0.360307	6.0013	0.413986	2.22439	0.568431	7.28034	3.11882
Z021E0064	NA	0.472932	0.307495	3.78418	0.407069	2.16037	0.469951	6.66956	2.90124
Z021E0065	0.947459	0.560113	0.435195	4.19545	0.44234	1.62057	0.503656	5.57004	2.90743
Z021E0066	0.941784	0.551552	0.341816	4.4211	0.292704	1.97663	0.446887	6.64798	3.12353
Z021E0067	0.915489	0.543207	0.367281	4.88004	0.412126	2.31992	0.58209	7.15167	3.33569
Z021E0069	0.93907	0.50301	0.349493	6.09201	0.236135	2.31152	0.455666	7.81246	NA
Z021E0070	0.931224	0.494384	0.404279	5.62717	0.428672	2.06419	0.638336	6.55023	3.33639
Z021E0071	0.937126	0.427913	0.354619	5.59819	0.226412	2.83256	0.453305	8.33009	NA
Z021E0072	0.976119	0.624455	0.352697	5.73655	0.5341	2.37406	0.46769	6.85218	2.90571
Z021E0073	0.993034	0.555064	0.329601	4.7201	0.429354	2.64739	0.41032	7.70343	3.71513
Z021E0074	0.924155	0.505599	0.4076	4.5928	0.420995	2.09664	0.541126	6.33466	3.10013
Z021E0075	0.944287	0.66504	0.427588	4.54547	0.42899	1.93405	0.540529	5.69261	3.53795
Z021E0076	0.933749	0.48331	0.382625	4.92776	0.431664	2.1669	0.502894	6.60252	3.33628
Z021E0077	0.967296	0.482955	0.349893	4.59459	0.325504	2.41137	0.432126	7.19028	3.62197
Z021E0078	0.928263	0.455884	0.270941	4.12516	0.295154	2.4113	NA	7.96241	4.24252
Z021E0079	0.92832	0.486699	0.333363	4.882	0.399531	2.3595	0.56638	6.68047	3.32896
Z021E0080	0.92394	0.590841	0.415012	5.83835	0.403887	2.20149	0.518842	6.93378	3.5357
Z021E0081	0.924437	0.487686	0.314928	4.22225	0.284556	2.54637	0.431276	7.75962	3.51898
Z021E0082	0.932535	0.508572	0.369481	5.55036	0.397069	2.64512	0.502743	7.40852	4.13198
Z021E0083	NA	0.584018	0.365381	6.22987	0.339991	2.24327	0.447104	8.13603	3.74285
Z021E0084	0.917256	0.616673	0.45771	4.28855	0.39883	1.87106	0.555826	5.72475	2.90583
Z021E0085	0.922527	0.459187	0.316129	6.14063	0.419361	2.43796	0.501597	7.82922	3.64871
Z021E0086	NA	0.582953	0.395433	5.60594	0.269634	2.59646	0.487696	8.6548	NA
Z021E0087	0.929614	0.415371	0.389393	5.22657	0.201583	2.23595	0.401272	8.04366	NA
Z021E0088	NA	0.485466	0.392347	3.99233	0.469749	1.84869	0.485475	6.25284	3.74366
Z021E0089	0.935985	0.562476	0.376441	4.14712	0.450317	2.01785	0.509112	6.0916	2.90395
Z021E0090	0.941486	0.616052	0.571422	5.73449	0.484386	2.14436	0.643342	6.16388	3.12745
Z021E0091	0.933968	0.575692	0.339066	3.34443	0.467439	1.80721	0.491706	5.22237	3.01532
Z021E0092	0.925173	0.482506	0.272594	4.92846	0.359829	2.56335	0.436907	7.81802	3.54256
Z021E0093	0.944733	0.602589	0.455382	4.68671	0.480499	1.82606	0.577081	5.46207	3.14602
Z021E0094	0.918802	0.523833	0.383715	4.68826	0.383896	2.16563	0.471234	6.89748	3.74455
Z021E0096	0.92475	0.454089	0.319245	4.12624	0.251277	2.39707	0.398312	7.67145	3.73984
Z021E0097	0.94926	0.522959	0.392917	4.33846	0.456282	2.3988	0.656794	5.95919	3.53962
Z021E0098	0.9286	0.532369	0.372703	5.13222	0.370455	2.15332	0.458566	6.85652	3.78707
Z021E0100	0.924215	0.474197	0.281776	5.33312	0.213805	2.44706	0.440988	8.01627	3.635
Z021E0101	0.967452	0.558766	0.344955	4.57737	0.501817	2.18838	0.490796	6.31098	2.90645
Z021E0102	0.97742	0.55794	0.339545	5.81626	0.338248	2.74357	0.581777	7.29471	3.33664
Z021E0103	0.924829	0.431067	0.26021	5.45707	0.290612	2.65151	0.481028	8.20762	3.93988
Z021E0104	0.96326	0.495096	0.35109	5.57762	0.254933	2.5034	0.492118	7.51926	3.74652
Z021E0105	0.932566	0.49299	0.270025	4.54922	0.395745	2.4631	0.556793	6.97659	NA
Z021E0106	0.921289	0.4589	0.329665	3.5361	0.277537	2.04872	0.503695	6.01978	2.90261
Z021E0107	0.945077	0.524129	0.381129	5.83242	0.336008	2.26762	0.502399	7.26242	3.74364
Z021E0108	0.930275	0.598073	0.412092	4.21332	0.442172	2.05972	0.505813	6.17618	3.03455
Z021E0110	0.931256	0.521727	0.300206	3.56012	0.286379	2.45946	0.395204	7.47719	NA
Z021E0111	0.936533	0.52172	0.346381	4.41996	0.306295	2.26484	0.427983	7.10405	3.91751
Z021E0112	0.960001	0.543315	0.357107	4.42513	0.321896	2.42255	0.5187	6.50178	3.54256
Z021E0113	0.945814	0.51314	0.381217	4.29414	0.321572	2.26225	0.498847	6.51029	3.33466
Z021E0114	0.919491	0.460773	0.37686	4.45697	NA	2.52918	0.439379	7.5761	NA
Z021E0115	0.928956	0.574554	0.371466	5.22261	0.469046	2.35208	0.591731	6.69219	3.33639
Z021E0116	0.93068	0.516975	0.342073	4.50426	0.405094	2.24557	0.606708	6.12284	3.33709
Z021E0118	0.940937	0.485058	0.319321	5.36831	0.342157	2.36586	0.453685	7.68808	NA
Z021E0119	0.927509	0.44693	0.311347	5.38489	0.2434	2.29595	0.426345	7.89594	3.93378
Z021E0120	0.930848	0.473146	0.431501	5.2402	0.398301	1.86478	0.629059	5.96425	3.32812
Z021E0121	NA	0.463386	0.310953	5.62775	0.283074	2.23281	0.436003	8.01563	NA
Z021E0123	0.922814	0.528751	0.37959	6.08324	0.373706	2.36479	0.473179	7.85949	3.53477
Z021E0124	0.9247	0.524801	0.327868	3.68651	0.404048	2.00345	0.483177	6.07616	3.74416
Z021E0125	0.933585	0.533292	0.49795	4.92381	0.445275	2.02184	0.639917	5.8138	3.30913
Z021E0126	0.928255	0.543253	0.42001	4.91648	0.479765	2.08049	0.637011	5.99273	3.03129
Z021E0127	0.949431	0.559607	0.344529	3.9023	0.459987	2.83918	0.504642	6.55942	3.53871
Z021E0128	0.930143	0.475284	0.307886	5.8396	0.280759	2.63285	0.46028	8.04354	4.12978
Z021E0129	0.924831	0.493997	0.355808	4.34035	0.366326	2.4643	0.467324	7.21092	3.92479
Z021E0130	0.922041	0.541039	0.426011	5.35841	0.361514	2.11734	0.540015	6.81466	2.90216
Z021E0131	0.923921	0.505156	0.26402	5.79805	0.260767	2.48605	0.40552	8.33763	4.04536
Z021E0133	NA	0.423461	0.364794	4.34504	0.473871	2.11177	0.449016	6.96527	3.54254
Z021E0134	0.919538	0.47508	0.399819	4.622	0.315645	2.31411	0.427059	7.41821	3.74361
Z021E0135	0.922141	0.444805	0.359297	4.56735	0.325321	2.41165	0.494853	7.04063	3.44632
Z021E0136	0.939665	0.517209	0.328529	3.82679	0.41343	2.35101	0.451884	6.49651	3.23701
Z021E0137	0.922021	0.415656	0.316862	5.85066	0.222834	2.63336	0.458047	8.506	3.60976
Z021E0138	NA	NA	0.23978	4.60254	0.34053	2.65521	0.399991	8.34452	4.1306
Z021E0139	0.929382	0.502643	0.31858	4.53762	0.265929	2.39857	0.40898	7.34943	3.90905
Z021E0140	0.935497	0.527831	0.374813	4.63476	0.378334	2.05622	0.616149	6.03576	3.12543
Z021E0141	0.940799	0.50133	0.363157	4.68599	0.449491	2.01784	0.610434	5.97737	2.90857
Z021E0144	0.932694	0.483788	0.31613	4.86772	0.441793	2.42579	0.488935	7.53114	3.84967
Z021E0148	0.92847	0.45981	0.417333	6.03446	0.295515	2.39234	0.526272	7.58521	3.74403
Z021E0149	0.92902	0.522809	0.322893	4.20973	0.227912	2.24163	0.431947	7.19099	3.74363
Z021E0150	0.929195	0.45259	0.296714	5.92943	0.315681	2.71086	0.449087	8.18478	4.12962
Z021E0151	0.933599	0.443071	0.356824	5.15896	0.392327	2.37384	0.626692	6.8115	3.44558
Z021E0152	0.924233	0.4915	0.280644	4.60954	0.29608	2.73368	NA	8.9117	NA
Z021E0153	0.914775	0.403716	0.278163	5.18768	0.344804	2.27027	0.572128	7.1944	3.74284
Z021E0154	0.920088	0.45933	0.342676	5.09291	0.418896	2.18527	0.411748	7.62838	NA
Z021E0156	0.914185	0.452792	0.371887	4.97244	0.218034	2.72456	0.422964	8.50836	3.93644
Z021E0157	NA	0.412516	0.344162	4.96384	0.460859	2.29245	0.479866	7.22987	3.54255
Z021E0158	0.924453	0.442927	0.332679	4.25756	0.373398	2.28457	0.411624	7.35628	3.12005
Z021E0159	0.936655	0.497665	0.306291	4.35944	0.34511	2.48459	0.610061	6.278	3.74356
Z021E0160	NA	0.426364	0.376783	4.64635	NA	2.42687	0.405857	7.9525	4.13382
Z021E0161	0.948982	0.563474	0.380862	5.68157	0.381204	2.51588	0.438901	7.6003	3.74364
Z021E0162	0.936776	0.504824	0.292277	3.71038	0.428423	2.42017	0.479205	6.60338	3.34097
Z021E0163	0.933913	0.558963	0.270175	4.43931	0.463705	2.37719	0.466775	6.76498	3.2488
Z021E0164	NA	0.573724	0.392292	4.96419	0.452883	2.11985	0.622112	6.41926	2.90177
Z021E0166	0.944579	0.555266	0.413548	5.04299	0.442446	1.83702	0.627565	5.16819	2.88681
Z021E0167	0.931658	0.461459	0.361276	5.85879	0.377345	2.24865	0.498201	7.40014	3.65662
Z021E0168	NA	0.51423	0.40973	4.42712	0.220104	1.92413	0.433211	7.69822	NA
Z021E0169	0.932482	0.471617	0.353933	5.52913	0.399086	2.23189	0.528074	7.31926	NA
Z021E0170	0.972402	0.587226	0.308134	6.7135	0.516292	2.59611	0.510672	7.88403	NA
Z021E0172	0.932964	0.480799	0.351615	4.72085	0.44736	1.98614	0.558107	6.16115	3.33091
Z021E0173	NA	0.518336	0.3395	4.15756	0.465989	2.52023	0.461362	7.27452	3.74195
Z021E0174	0.944	0.53765	0.332035	4.99352	0.472096	2.54756	0.438245	7.2916	3.73572
Z021E0175	0.921851	0.472594	0.33089	5.5298	0.423419	2.51728	0.454358	8.02615	3.82634
Z021E0176	0.931672	0.512674	0.378765	5.04949	0.441497	2.19871	0.609362	6.14631	3.44359
Z021E0177	0.940322	0.530601	0.298366	4.83359	0.466678	2.38057	0.629756	6.49905	3.33571
Z021E0178	0.923939	0.551212	0.372051	4.28599	0.363919	1.84208	0.586796	6.0184	3.33634
Z021E0179	0.924717	0.531169	0.326472	4.29995	0.413409	1.86495	0.497176	6.14721	2.90644
Z021E0180	0.934704	0.485225	0.333016	5.58439	0.434853	2.44359	0.529938	7.25883	3.76951
Z021E0181	0.965303	0.459349	0.373169	4.86258	0.404786	1.85148	0.507346	6.16643	3.94139
Z021E0182	0.918403	0.460415	0.306979	5.18423	0.455121	2.5612	0.5641	7.76049	3.74914
Z021E0184	NA	0.44161	0.400971	4.21629	0.351215	1.98932	0.447712	6.77465	4.13112
Z021E0185	0.924071	0.52635	0.389939	5.46617	0.480081	2.3598	0.582485	6.91913	3.14405
Z021E0186	0.969214	0.533423	0.341751	3.51461	0.346234	2.1228	0.497243	5.73254	3.33169
Z021E0187	0.939179	0.515389	0.317849	6.35344	0.37371	2.471	0.42814	8.2591	3.96381
Z021E0188	0.941205	0.506236	0.293458	4.44334	0.257235	2.34791	0.412473	7.50798	4.03577
Z021E0189	0.934769	0.507984	0.378955	3.47081	0.344437	1.89327	0.512475	5.14197	2.90888
Z021E0190	0.939257	0.527071	0.292032	4.13799	0.412427	2.20275	0.638553	5.93107	3.33642
Z021E0191	0.924587	0.500237	0.389695	4.585	0.486937	2.02394	0.600732	5.88635	3.14809
Z021E0192	0.930822	0.557435	0.391788	5.50711	0.41698	2.06237	0.552699	6.64506	2.79319
Z021E0193	0.941571	0.475914	0.373132	5.10791	0.457049	1.94482	0.582139	6.26114	2.90654
Z021E0194	0.918424	0.490494	0.400451	4.9139	0.437308	1.83187	0.572815	6.10038	3.33721
Z021E0195	0.962951	0.54218	0.333634	4.85588	0.233337	2.63455	0.442081	7.60866	3.12347
Z021E0196	0.923222	0.460086	0.336396	5.45649	0.287235	2.4964	0.428132	7.90143	3.91603
Z021E0197	NA	0.508827	0.306606	4.65654	0.317434	1.9476	0.419403	7.12676	3.54244
Z021E0198	0.936928	0.526052	0.327173	4.25437	0.45573	2.28389	0.477994	7.00581	3.62983
Z021E0199	0.925364	0.45358	0.375055	4.83841	0.400168	2.22298	0.482484	7.06953	3.54177
Z021E0200	0.935402	0.518068	0.416684	5.39447	0.438892	2.36265	0.554904	7.12098	3.23879
Z021E0205	0.920232	0.597057	0.452058	5.23405	0.381997	2.01894	0.520494	6.39716	3.52755
Z021E0216	0.925417	0.519615	0.345905	4.65073	0.37666	2.05714	0.524177	6.34047	3.03203
Z021E0235	0.932455	0.456243	0.32366	4.84859	0.288676	2.4017	0.398252	7.88619	4.13035
Z021E0241	0.925582	0.486289	0.314609	3.75213	0.375182	2.45063	0.45675	6.9849	3.63502
Z023E0001	0.932502	0.483846	0.3366	5.25266	0.271826	2.47737	0.535894	7.57438	3.64949
Z023E0003	0.940171	0.523953	0.353835	6.05992	0.34047	2.40354	0.524336	7.54951	3.76159
Z023E0004	0.94015	0.473767	0.359972	4.766	0.29722	2.35133	0.549621	6.82996	3.38539
Z023E0006	0.953249	0.530634	0.40788	4.52208	0.368535	2.29361	0.648476	6.32801	3.48118
Z023E0008	0.945339	0.549658	0.381708	5.91762	0.35663	2.12567	0.524155	6.87054	NA
Z023E0009	0.940155	0.516009	0.428974	4.49632	0.285603	2.15243	0.634609	5.82608	3.46427
Z023E0010	0.948593	0.525746	0.398917	4.24616	0.379689	1.9957	0.61552	5.77267	3.27092
Z023E0011	0.932947	0.527349	0.410466	5.33161	0.263471	2.67455	0.556143	7.28033	3.68048
Z023E0012	0.924055	0.483202	0.335462	4.88964	0.339931	2.56574	0.498566	7.38783	NA
Z023E0013	0.95296	0.519452	0.308254	4.96868	0.372022	2.17246	0.492887	6.86417	3.43756
Z023E0014	0.947875	0.516755	0.408443	4.04921	0.369479	2.3309	0.655157	5.88324	3.88294
Z023E0015	0.955356	0.572963	0.452818	2.91959	0.438168	1.90605	0.711549	4.14387	2.93348
Z023E0016	0.950712	0.526458	0.405897	3.85096	0.385565	2.03155	0.663245	5.14959	3.68135
Z023E0018	0.948941	0.523414	0.34774	4.76504	0.43213	2.44217	0.60396	6.47432	3.58336
Z023E0019	0.951259	0.549596	0.426669	4.2019	0.411781	2.31626	0.680135	5.62581	3.23744
Z023E0020	0.934073	0.55243	0.416037	4.46961	0.431665	1.98317	0.568492	5.59981	3.23926
Z023E0021	0.938685	0.487394	0.291817	5.06862	0.330883	2.57096	0.635563	7.32956	NA
Z023E0023	0.945642	0.546032	0.436587	4.28402	0.418079	1.97292	0.654441	5.259	3.22607
Z023E0024	0.946425	0.529941	0.388621	3.59715	0.363999	2.02912	0.625577	5.08923	2.60907
Z023E0025	0.940455	0.526012	0.378624	5.06151	0.382626	2.17218	0.587655	6.18007	3.48017
Z023E0026	0.939797	0.463458	0.352055	4.41521	0.400242	2.44389	0.615347	6.54867	4.05354
Z023E0027	0.942321	0.539144	0.352971	4.54322	0.393135	2.31272	0.572656	5.86001	3.68451
Z023E0028	0.935703	0.479798	0.297343	5.64744	0.298838	2.65764	0.556847	7.85221	3.75015
Z023E0029	0.944776	0.517662	0.400025	4.02231	0.372885	2.19307	0.66289	5.66948	3.29403
Z023E0030	0.944268	0.550599	0.419316	4.59775	0.341214	2.11741	0.625964	6.13881	3.20317
Z023E0031	0.949105	0.549496	0.379493	3.91151	0.413335	1.84432	0.610762	5.26367	3.47863
Z023E0032	0.951514	0.578011	0.442363	3.43186	0.440053	2.08202	0.69148	4.56126	2.84028
Z023E0034	0.947935	0.509938	0.365895	4.17443	0.429734	2.43602	0.615728	6.01983	3.44135
Z023E0035	0.942901	0.529896	0.402531	3.84299	0.389604	2.03403	0.640581	5.28206	3.30728
Z023E0036	0.949097	0.552163	0.459848	3.5314	0.409299	1.92622	0.650943	4.96827	3.29096
Z023E0038	0.947354	0.52743	0.378104	4.32254	0.379251	2.14732	0.577771	6.0091	3.48116
Z023E0039	0.943095	0.530312	0.366976	5.74621	0.327322	2.20689	0.65869	6.97836	3.38811
Z023E0040	0.937805	0.486765	0.373167	5.42089	0.423052	2.15858	0.559475	6.82355	3.43152
Z023E0041	0.945455	0.52505	0.37075	4.45409	0.403534	2.09428	0.55577	6.19847	3.55804
Z023E0042	0.944857	0.556914	0.349173	4.55928	0.449631	2.30875	0.609894	6.4906	3.55718
Z023E0043	0.931401	0.521384	0.428918	5.32211	0.384277	2.37226	0.628752	6.47846	3.48004
Z023E0044	0.936091	0.52553	0.406094	5.45541	0.330191	2.37824	0.539113	6.84302	3.74786
Z023E0045	0.944438	0.587317	0.439567	4.80464	0.43028	1.95029	0.645631	5.5638	3.64592
Z023E0048	0.934968	0.488096	0.415153	5.35675	0.380896	2.53891	0.622651	7.06233	3.4796
Z023E0049	0.950729	0.527687	0.381721	4.77743	0.380042	2.05413	0.581727	6.31262	3.4839
Z023E0050	0.940588	0.425767	0.275652	4.49703	0.276005	2.49639	NA	7.22313	4.25014
Z023E0051	0.930308	0.498812	0.349061	5.04549	0.261974	2.58078	0.504796	7.26701	2.61165
Z023E0052	0.947645	0.527639	0.398968	5.03367	0.381084	2.16516	0.593868	6.49606	3.88187
Z023E0053	0.945948	0.52141	0.428601	4.78047	0.459053	2.41763	0.651546	6.08143	3.23838
Z023E0054	0.947744	0.54917	0.370719	4.43214	0.414354	2.11282	0.58598	5.82608	2.84445
Z023E0055	0.952031	0.509068	0.423797	5.09893	0.418598	2.28731	0.627072	6.29063	3.65128
Z023E0056	0.948988	0.550697	0.427883	3.1141	0.393908	1.44852	0.652773	4.65646	3.4787
Z023E0057	0.946698	0.550839	0.394123	4.60189	0.375031	2.06148	0.610807	5.74979	3.47794
Z023E0059	0.939642	0.541865	0.378108	5.42344	0.347558	2.40552	0.579707	6.96659	3.35572
Z023E0060	0.94484	0.560461	0.390358	5.20325	0.441359	2.33678	0.550353	6.76331	3.65912
Z023E0062	0.948639	0.537251	0.413674	4.20314	0.397673	2.18125	0.61183	6.01276	3.87485
Z023E0063	0.941002	0.491966	0.335229	4.80748	0.360505	2.60133	0.57818	7.14482	3.88077
Z023E0064	0.944653	0.546685	0.344102	4.12754	0.380404	1.96719	0.566275	5.73071	3.36681
Z023E0065	0.943424	0.496663	0.379647	4.78895	0.380714	2.48506	0.660929	6.32191	3.04017
Z023E0068	0.935193	0.449962	0.375103	4.70838	0.345299	2.24327	0.593664	6.64619	3.27412
Z023E0069	0.944327	0.517362	0.379366	4.19622	0.503849	2.22597	0.537589	5.95104	3.0387
Z023E0070	0.942426	0.515034	0.380505	5.10348	0.357185	2.52334	0.577559	6.89105	3.65939
Z023E0071	0.953713	0.543583	0.411451	3.65669	0.425143	2.08549	0.680204	5.07178	3.02634
Z023E0072	0.953444	0.552535	0.432258	4.76614	0.361914	2.21067	0.654831	6.10168	3.57204
Z023E0075	0.938726	0.556566	0.362646	5.56898	0.330388	2.07733	0.494326	6.97338	3.31993
Z023E0076	0.935374	0.527845	0.397021	5.78153	0.311813	2.16764	0.551397	7.17965	3.02984
Z023E0077	0.950588	0.755414	0.506227	2.95211	0.341528	1.6502	0.706233	4.07197	3.01827
Z023E0078	0.947886	0.546792	0.354065	4.71337	0.392225	2.33929	0.586405	6.20267	NA
Z023E0080	0.959138	0.684208	0.449228	3.53925	0.420927	2.00081	0.711296	4.6187	3.03149
Z023E0081	0.948404	0.529165	0.389843	4.33627	0.382898	2.13009	0.582086	6.14579	3.05878
Z023E0082	0.939494	0.528157	0.410012	4.17489	0.365504	2.16411	0.651863	5.16012	3.4829
Z023E0083	0.945598	0.485531	0.32355	5.31075	0.397905	2.18312	NA	6.85928	4.04213
Z023E0084	0.94275	0.534673	0.409447	4.62125	0.390106	2.00171	0.635171	5.69035	3.05985
Z023E0085	0.95038	0.53092	0.352411	4.05422	0.383362	2.17995	0.583989	6.16376	3.88253
Z023E0087	0.945221	0.560208	0.382783	4.38492	0.332118	2.21058	0.59905	5.59286	3.02005
Z023E0088	0.935715	0.491365	0.31841	4.25225	0.396445	1.92664	0.553736	6.28918	3.47951
Z023E0089	0.942304	0.531718	0.363025	5.56691	0.369227	2.6349	0.548076	7.29051	NA
Z023E0090	0.92982	0.510706	0.282146	4.04934	0.307771	1.86224	0.65024	5.92985	3.6804
Z023E0091	0.937165	0.472206	0.402281	5.01932	0.364691	2.50261	0.593996	6.98429	3.48089
Z023E0092	0.94486	0.63676	0.469604	3.98569	0.354518	1.95077	0.665708	5.06625	3.02311
Z023E0093	0.948872	0.468521	0.358584	5.38055	0.462144	2.49423	0.541673	7.10914	3.66043
Z023E0094	0.946149	0.517822	0.368838	6.0656	0.34396	2.38714	0.521729	7.41468	3.63987
Z023E0095	0.94861	0.584528	0.408864	4.70062	0.431576	2.2429	0.571252	6.1641	3.02159
Z023E0096	0.932794	0.454103	0.328125	5.4178	0.230343	2.41786	0.546425	7.32398	3.3162
Z023E0097	0.948191	0.529997	0.465489	3.26768	0.376582	2.03123	0.655305	4.97629	3.06232
Z023E0098	0.952828	0.52509	0.387945	4.1457	0.422155	2.4533	0.670522	5.83074	3.04607
Z023E0099	0.954032	0.540786	0.458604	4.40266	0.445575	2.49134	0.709632	5.79918	3.02474
Z023E0100	0.932142	0.530971	0.374711	4.60756	0.383065	2.59337	0.558853	6.62458	3.88068
Z023E0101	0.949708	0.530835	0.431021	3.41563	0.405864	2.24277	0.676929	5.04879	3.35794
Z023E0102	0.943851	0.501374	0.376229	4.82557	0.369275	2.43678	0.598164	6.26039	3.77069
Z023E0103	0.947304	0.544483	0.420467	5.28342	0.357619	2.22682	0.563496	6.74256	NA
Z023E0104	0.946035	0.579266	0.467553	4.02153	0.426083	1.84376	0.688118	5.06291	2.94554
Z023E0105	0.94139	0.523675	0.375326	4.68507	0.393384	2.26325	0.54657	6.77053	3.76266
Z023E0107	0.947494	0.522995	0.38059	5.76985	0.347737	2.29457	0.518956	7.07962	3.64709
Z023E0108	0.951917	0.557264	0.38227	3.58252	0.39483	2.07469	0.64137	5.0675	3.27222
Z023E0109	0.950303	0.521485	0.377697	4.27882	0.373131	2.19421	0.624595	5.63586	3.48114
Z023E0110	0.944466	0.509259	0.347838	4.58698	0.341723	2.3315	0.580352	6.5614	3.64337
Z023E0111	0.945517	0.501846	0.343055	5.61965	0.369983	2.46001	NA	7.45011	3.85237
Z023E0112	0.938582	0.545989	0.410282	4.6165	0.373571	2.20669	0.608005	5.95128	3.48236
Z023E0113	0.948819	0.524146	0.387686	4.25173	0.417616	2.22071	0.631583	5.84014	3.00158
Z023E0114	0.940678	0.469961	0.32988	5.552	0.282989	2.58392	0.5408	7.79737	3.02755
Z023E0115	0.947564	0.46629	0.368267	5.35418	0.323529	2.18792	0.617781	7.1292	3.5686
Z023E0116	0.932639	0.499929	0.391284	4.80763	0.397827	2.3237	0.548645	6.33468	3.58079
Z023E0117	0.93538	0.554296	0.357547	4.67756	0.330241	2.39268	0.565526	6.6511	3.02279
Z023E0118	0.949953	0.524845	0.409879	4.01318	0.378224	1.90423	0.612858	5.6138	3.05994
Z023E0119	0.951929	0.536014	0.357858	5.04955	0.301724	2.57151	0.648754	5.60614	3.88429
Z023E0120	0.935295	0.490984	0.445221	4.03783	0.458938	2.18906	0.60254	5.66648	3.02542
Z023E0122	0.934713	0.525467	0.402103	5.11308	0.361318	2.46189	0.635571	6.56781	3.87809
Z023E0123	0.948023	0.538669	0.397139	4.9083	0.327075	2.00903	0.601536	6.01334	3.65314
Z023E0124	0.938637	0.57376	0.428554	4.7786	0.393889	1.91538	0.630241	5.67191	2.58254
Z023E0125	0.934617	NA	0.286392	4.54365	0.303398	2.62749	NA	7.5082	3.65834
Z023E0126	0.942157	0.512599	0.329777	5.16249	0.358942	2.25905	0.602371	6.70859	3.88025
Z023E0127	0.938556	0.483142	0.399814	4.93357	0.339361	2.36289	0.613375	6.43387	3.29115
Z023E0128	0.945032	0.554105	0.388317	4.4911	0.399097	2.03567	0.61891	5.57925	3.8818
Z023E0129	0.9415	0.484108	0.474521	4.4953	0.366919	2.23716	0.626251	6.04848	3.36801
Z023E0130	0.95222	0.576411	0.401128	3.75353	0.432063	1.81434	0.587011	4.91488	3.18586
Z023E0131	0.933151	0.527652	0.331664	4.03953	0.300897	2.13522	0.655581	5.98031	3.13172
Z023E0133	0.938618	0.438869	0.371773	4.16037	0.397469	2.32186	0.596969	6.14171	3.01003
Z023E0134	0.938547	0.488671	0.376569	4.79599	0.346449	2.52343	0.603826	6.56717	3.23709
Z023E0135	0.944242	0.569644	0.435836	4.02982	0.328326	2.0795	0.659914	5.26395	2.83911
Z023E0136	0.937545	0.511437	0.401202	5.32794	0.292306	2.47667	0.544509	6.88991	3.47975
Z023E0137	0.939544	0.510468	0.409484	3.56332	0.354675	1.83125	0.646218	5.45885	3.05921
Z023E0138	0.944028	0.572029	0.422457	4.91394	0.45661	2.36662	0.63603	6.19304	3.01877
Z023E0139	0.946742	0.529474	0.400343	5.12707	0.390891	2.20011	0.595532	6.95862	3.47746
Z023E0140	0.950365	0.557571	0.452686	4.27138	0.41369	2.14326	0.705297	5.44737	3.06459
Z023E0141	0.94735	0.569644	0.3862	5.61025	0.343884	2.73935	0.615179	7.30619	3.0445
Z023E0142	0.94739	0.574127	0.370793	4.26902	0.416457	2.16326	0.605225	5.67945	3.24016
Z023E0143	0.946384	0.476855	0.374745	5.3834	0.335386	2.5992	0.569762	7.27971	3.64923
Z023E0144	0.933116	0.517426	0.348087	5.75781	0.27256	2.39768	0.526908	7.50853	3.57296
Z023E0145	0.944027	0.554468	0.426054	4.76516	0.414051	2.21328	0.639532	5.78207	3.06367
Z023E0146	0.939241	0.496354	0.345595	4.64	0.317541	2.35049	0.587423	6.38847	3.57423
Z023E0147	0.95041	0.533743	0.434541	3.89337	0.420067	2.10338	0.694721	5.30194	3.22441
Z023E0148	0.952199	0.524243	0.371185	4.54871	0.398639	2.34029	0.604263	6.09482	3.67014
Z023E0149	0.936429	0.545567	0.344616	5.43832	0.355367	2.5301	0.519729	7.46056	4.02955
Z023E0150	0.950022	0.45168	0.330404	7.4529	0.371639	2.75087	0.503884	9.20353	3.57068
Z023E0151	0.934694	0.47223	0.348795	5.91316	0.265078	2.57646	0.500619	7.8866	3.64564
Z023E0152	0.938686	0.566314	0.332449	5.5284	0.243731	2.58419	0.529164	7.36946	3.57732
Z023E0153	0.941374	0.468413	0.36692	5.125	0.29868	2.40182	0.534523	6.89214	3.66799
Z023E0154	0.948341	0.563239	0.356629	4.54202	0.447434	2.60077	0.568851	6.59166	3.77979
Z023E0155	0.942943	0.513571	0.380656	4.87251	0.439982	2.31042	0.586975	6.22006	2.95818
Z023E0156	0.930245	0.514584	0.385433	4.88373	0.387763	2.38177	0.589411	6.536	3.37292
Z023E0157	0.941708	0.590398	0.38836	5.11743	0.417564	2.02672	0.554568	6.0941	3.25808
Z023E0158	0.947169	0.552446	0.380778	4.56486	0.392098	1.95424	0.584152	5.93945	3.48036
Z023E0160	0.939057	0.505325	0.357811	4.59221	0.392317	2.19346	0.596772	6.52345	3.2408
Z023E0161	0.951179	0.557198	0.333035	5.16092	0.297276	2.09375	NA	6.58211	4.22674
Z023E0162	0.945162	0.530406	0.362804	4.47474	0.451611	2.50497	0.6043	6.34013	3.28355
Z023E0164	0.947242	0.516489	0.295052	6.27816	0.345472	2.76436	0.658293	7.80037	3.32316
Z023E0165	0.950971	0.575632	0.322837	4.25113	0.352228	2.15749	0.527464	6.34142	3.8832
Z023E0166	0.949691	0.473709	0.339212	5.89119	0.464676	2.73816	0.566812	7.79134	4.06408
Z023E0169	0.947078	0.54571	0.387203	6.21638	0.343232	2.52373	0.536579	7.54128	3.57418
Z023E0170	0.939611	0.542609	0.43777	4.06292	0.368726	2.03589	0.649848	5.47297	3.04819
Z023E0171	0.949548	0.522004	0.397794	4.79499	0.446243	2.08944	0.610468	6.0728	3.89327
Z023E0172	0.951359	0.550982	0.392155	3.9576	0.388183	2.02469	0.644802	5.23423	3.4811
Z023E0173	0.943484	0.53118	0.386618	5.84339	0.373755	2.39507	0.559761	7.32092	3.27219
Z023E0174	0.942003	0.499072	0.340103	5.4341	0.319494	2.68061	0.649405	7.68383	3.57158
Z023E0175	0.948555	0.496505	0.342799	4.86258	0.366433	2.43504	0.572048	6.8342	3.64028
Z023E0177	0.944586	0.445716	0.348082	4.91128	0.422575	2.43537	0.629609	6.66342	3.64817
Z023E0178	0.950918	0.545526	0.452806	3.59231	0.438132	2.05384	0.739028	4.72722	3.04656
Z023E0179	0.944792	0.526809	0.358252	6.2986	0.350936	2.77385	0.584528	7.56434	3.03928
Z023E0180	0.950199	0.520189	0.386343	5.13904	0.379577	2.29564	0.597769	6.73187	3.87942
Z023E0181	0.946782	0.515813	0.413814	4.33987	0.376754	2.1721	0.63635	6.00414	3.04525
Z023E0182	0.939695	0.495492	0.35331	4.76957	0.249697	2.381	0.546887	6.62224	3.74719
Z023E0184	0.949059	0.521063	0.37823	4.20885	0.440801	2.0569	0.612896	5.6132	3.39646
Z023E0186	0.944225	0.518893	0.330785	5.37428	0.359073	2.45508	0.50917	7.20696	3.31341
Z023E0187	0.948449	0.569814	0.376149	4.38341	0.402707	1.92764	0.69295	5.73829	2.94561
Z023E0188	0.936683	0.531777	0.414007	5.37291	0.49459	2.2556	0.582701	6.56102	3.44362
Z023E0189	0.951682	0.575079	0.358436	3.45904	0.388184	2.05885	0.583138	4.95226	3.14458
Z023E0190	0.937835	0.458278	0.346708	4.72694	0.366626	2.37532	0.536381	6.688	3.84803
Z023E0191	0.942464	0.564378	0.371342	4.82037	0.412627	2.15534	0.562388	6.21573	3.74965
Z023E0192	0.951446	0.549244	0.373973	3.74216	0.35328	2.45513	0.624618	5.5213	3.6435
Z023E0194	0.939256	0.524089	0.374325	6.29451	0.328026	2.31728	0.513033	7.48668	3.77631
Z023E0195	0.943134	0.543669	0.42027	4.1873	0.375765	2.07013	0.630909	5.59952	3.211
Z023E0196	0.950787	0.529577	0.326017	3.00699	0.331093	2.06818	0.573216	5.01465	3.02872
Z023E0197	0.947716	0.532148	0.397288	3.86836	0.364716	2.10224	0.629701	5.49169	3.20306
Z023E0198	0.944035	0.531956	0.297688	4.1919	0.361554	2.29294	0.645302	6.22626	3.56904
Z023E0199	0.944154	0.510902	0.341975	3.98858	0.400426	2.39564	0.619554	5.79937	3.45673
Z023E0200	0.946893	0.522801	0.441825	4.05902	0.416966	2.09354	0.660568	5.4016	3.47246
Z023E0217	0.929253	0.51232	0.34973	5.45082	0.338786	2.52329	0.5798	6.98226	3.88163
Z023E0225	0.9418	0.54118	0.409006	4.85816	0.288814	2.25855	0.615235	6.29922	3.48039
Z023E0231	0.93986	0.498982	0.378238	4.28077	0.368392	2.26221	0.562689	6.16584	4.02792
Z025E0001	0.938321	0.40629	0.3454	3.40391	0.340873	2.03013	0.63064	5.6559	3.14211
Z025E0002	0.937039	0.55175	0.399172	4.6138	0.410599	2.23708	0.59089	6.23067	3.2873
Z025E0003	0.940723	0.457814	0.419319	4.6107	0.448715	1.98742	0.683743	6.03859	3.14719
Z025E0004	0.933874	0.502798	0.369138	4.92931	0.408344	2.25327	0.507229	6.70492	3.50841
Z025E0005	0.945577	0.430637	0.357735	5.46969	0.37472	2.35336	0.508818	7.32578	3.52626
Z025E0006	0.943115	0.479698	0.414274	3.96142	0.444049	1.82058	0.622191	5.31532	1.92398
Z025E0007	0.944651	0.539899	0.460816	3.64583	0.400672	1.48763	0.639312	4.66557	2.60923
Z025E0008	0.94645	0.509957	0.368955	5.53285	0.33045	2.26156	0.52896	7.23008	3.48349
Z025E0010	0.945946	0.477414	0.446922	3.30425	0.428909	1.60574	0.667943	4.62492	2.51164
Z025E0011	0.945351	0.513885	0.442085	3.85929	0.452899	1.94497	0.678972	5.06272	2.74178
Z025E0015	0.944475	0.550743	0.363675	4.93268	0.376209	2.14678	0.552795	6.45335	3.47158
Z025E0016	0.94448	0.453654	0.405781	4.30497	0.369861	1.84167	0.564452	5.95158	1.89884
Z025E0017	0.93866	0.483996	0.421703	4.7859	0.411855	1.8296	0.624065	5.9679	3.4863
Z025E0018	0.939031	0.561955	0.378929	4.68207	0.405704	2.11834	0.534759	6.49949	3.03606
Z025E0019	0.943136	0.445393	0.367835	5.8944	0.336149	2.06507	0.536275	7.20699	3.87652
Z025E0020	0.940557	0.507491	0.447362	4.95012	0.45952	1.81107	0.645578	5.89423	3.09971
Z025E0021	0.945603	0.469928	0.446002	3.80242	0.456794	1.84684	0.641616	4.96687	2.91187
Z025E0022	0.948959	0.558162	0.436059	3.73829	0.395681	1.80462	0.683479	4.96358	2.28867
Z025E0023	0.93354	0.403032	0.312272	4.04214	0.328616	2.54351	NA	7.13617	3.68827
Z025E0024	0.939632	0.521812	0.389368	4.62835	0.393072	1.73974	0.601534	5.69723	2.39473
Z025E0025	0.939048	0.461759	0.455555	3.59394	0.470098	1.80796	0.66978	4.92709	2.38527
Z025E0026	0.939647	0.415569	0.408904	4.47042	0.434836	1.96167	0.610246	5.91383	2.8807
Z025E0027	0.948321	0.516212	0.436997	3.66196	0.455105	1.79755	0.677537	4.9722	2.17134
Z025E0028	0.938902	0.456804	0.32614	4.178	0.408869	1.93549	0.525854	6.27296	3.56711
Z025E0029	0.940356	0.488375	0.33523	5.20311	0.328857	2.54671	0.42905	7.809	3.88851
Z025E0030	0.935836	0.533197	0.338647	5.83016	0.366068	2.42431	0.464198	8.00311	3.7833
Z025E0032	0.950816	0.575839	0.417049	2.90174	0.330536	1.74937	0.702502	4.44494	1.9749
Z025E0033	0.946712	0.546458	0.409653	4.56477	0.382154	2.20482	0.556883	6.30035	3.04943
Z025E0034	0.942357	0.410053	0.414845	4.12415	0.454909	2.11347	0.614687	5.81938	2.98381
Z025E0035	0.934957	0.460322	0.286749	4.66577	0.355759	2.9	0.596419	7.59868	3.70302
Z025E0036	0.943682	0.529544	0.368375	4.19332	0.450337	2.15353	0.627473	5.97647	3.39125
Z025E0037	0.94838	0.551979	0.372152	4.8655	0.41797	2.44223	0.615459	6.36955	3.59133
Z025E0038	0.949111	0.569198	0.452368	3.00215	0.462276	1.68516	0.715844	4.21548	2.15973
Z025E0039	0.930997	0.560277	0.405059	4.95928	0.352917	2.07466	0.569862	6.37623	3.72454
Z025E0040	0.942714	0.550284	0.391267	5.19796	0.462558	2.10048	0.572973	6.31856	3.4736
Z025E0041	0.944173	0.58953	0.46978	4.15874	0.444739	1.81327	0.674278	5.10833	2.29236
Z025E0043	0.954586	0.460902	0.388544	4.49417	0.43835	2.14576	0.577736	5.92881	3.27215
Z025E0044	0.942876	0.420771	0.357135	4.39765	0.388142	2.1043	0.556106	6.44478	2.89438
Z025E0045	0.94392	0.479832	0.431654	3.81333	0.445413	1.96417	0.682818	5.17087	3.01586
Z025E0046	0.949075	0.562765	0.428811	3.96198	0.456731	2.1884	0.669536	5.41284	2.92016
Z025E0047	0.942924	0.504799	0.309047	4.32224	0.323247	2.54801	0.609431	6.66328	3.47468
Z025E0048	0.950215	0.484899	0.44319	3.3846	0.452708	1.71229	0.656417	4.54444	3.10133
Z025E0049	0.950647	0.560959	0.393928	4.72722	0.434147	2.34736	0.585005	6.28525	2.51263
Z025E0050	0.942793	0.555824	0.467849	5.25026	0.381471	2.00139	0.573488	6.27352	3.3375
Z025E0051	0.945789	0.498067	0.365848	4.64537	0.382706	2.20822	0.583555	6.41999	3.35112
Z025E0052	0.940484	0.452657	0.325317	5.36105	0.356159	2.52456	NA	7.62806	3.28185
Z025E0053	0.938615	0.487443	0.308297	5.33074	0.346926	2.47423	0.492539	7.48061	3.76189
Z025E0054	0.936773	0.536777	0.362583	3.91184	0.34535	2.37718	0.547316	6.43548	3.52742
Z025E0055	0.928178	0.543129	0.37241	5.1566	0.32217	2.12559	0.507636	7.13379	3.80183
Z025E0056	0.93378	0.509249	0.379648	6.75424	0.302047	2.61169	0.433885	8.52553	3.99962
Z025E0057	0.937905	0.501138	0.380889	5.05755	0.321935	2.48198	0.497963	7.19721	3.559
Z025E0059	0.943042	0.494481	0.409364	4.41971	0.410436	1.78019	0.573119	5.82143	2.3619
Z025E0060	0.948324	0.541948	0.407909	3.99529	0.443028	1.82461	0.554628	5.49348	2.74692
Z025E0061	0.939046	0.445005	0.342323	5.03722	0.390407	2.12614	0.519045	6.87847	2.88427
Z025E0062	0.930496	0.502825	0.353221	5.34671	0.425706	2.29448	0.564067	7.10484	3.31537
Z025E0063	0.939158	0.379175	0.343128	5.04059	0.298167	2.27699	0.55177	7.34451	3.79888
Z025E0064	0.936575	0.519831	0.394156	4.7949	0.433878	2.26225	0.55988	6.56528	3.55475
Z025E0065	0.939441	0.484571	0.323335	4.58249	0.400126	2.44389	0.531337	6.79019	3.46893
Z025E0066	0.933448	0.434396	0.394717	6.31274	0.279093	2.14993	NA	7.95857	3.27694
Z025E0067	0.938456	0.455541	0.288331	6.01208	0.370575	2.49323	0.476718	8.24725	2.64272
Z025E0068	0.945643	0.673904	0.429226	5.17548	0.433512	2.03574	0.582451	6.04063	2.88792
Z025E0069	0.944522	0.540693	0.298779	4.77537	0.351379	2.5151	0.511943	6.8895	3.30221
Z025E0070	0.947731	0.597086	0.478951	3.31823	0.448617	1.82836	0.655522	4.52461	2.40543
Z025E0073	0.932166	0.555724	0.425528	4.55873	0.300857	1.81467	0.558686	5.95407	2.81731
Z025E0074	0.939273	0.405676	0.364975	3.89808	0.333872	2.12907	0.532807	6.21827	3.71714
Z025E0075	0.937937	0.499846	0.352988	5.92499	0.357976	2.68213	NA	8.32285	4.09175
Z025E0076	0.946429	0.554908	0.321742	4.10471	0.426087	2.52814	0.561455	6.57418	3.29957
Z025E0077	0.935597	0.363557	0.359236	3.97921	0.363262	2.07703	0.483687	6.7145	3.71613
Z025E0078	0.940546	0.50822	0.366008	5.22616	0.322542	2.28399	NA	7.22334	2.39921
Z025E0079	0.936148	0.49961	0.42923	4.40778	0.427555	1.99738	0.630324	5.81049	2.90742
Z025E0080	0.940598	0.501157	0.430857	3.66763	0.412668	1.708	0.576004	4.95189	3.09856
Z025E0081	0.938435	0.56564	0.363636	3.93606	0.376241	2.01983	0.624891	5.59598	2.82995
Z025E0082	0.941333	0.476766	0.346558	5.52206	0.345474	2.37577	0.555572	7.28201	3.81571
Z025E0083	0.938278	0.492377	0.348134	5.3232	0.396597	2.31896	0.577889	7.09457	3.15337
Z025E0085	0.937168	0.464079	0.405792	4.34301	0.378466	1.99257	0.507783	6.43645	2.88447
Z025E0086	0.948366	0.528553	0.372256	5.34773	0.350079	2.32854	0.568423	6.89135	3.70904
Z025E0087	0.945191	0.502971	0.326709	4.03977	0.421276	2.36496	0.611114	6.24387	3.29755
Z025E0088	0.940906	0.579144	0.377679	5.7249	0.358805	2.29473	0.460779	7.55652	3.99653
Z025E0089	0.953796	0.569643	0.470876	3.22683	0.448739	2.09585	0.693854	4.56058	2.12852
Z025E0090	0.929501	0.447511	0.399617	5.20382	0.354012	2.03271	0.546498	6.71737	2.41044
Z025E0091	0.953893	0.595559	0.463049	3.28505	0.43537	1.79387	0.686554	4.37929	2.62007
Z025E0092	0.938598	0.574957	0.456004	4.34324	0.445168	1.9034	0.641042	5.47404	2.85848
Z025E0093	0.930404	0.496947	0.327727	5.91253	0.32456	2.21174	0.439146	7.90527	3.7058
Z025E0094	0.948517	0.503227	0.462916	3.35312	0.361018	1.49382	0.675566	4.7698	2.44439
Z025E0095	0.940967	0.459134	0.389499	4.47448	0.441094	1.92242	0.559269	5.88483	2.83661
Z025E0096	0.949173	0.543249	0.389353	3.69882	0.381032	2.27495	0.644649	5.58138	2.73091
Z025E0098	0.948601	0.51269	0.358461	4.07257	0.419325	2.3011	0.584361	6.0096	2.86568
Z025E0099	0.943069	0.571893	0.398329	4.29997	0.398262	1.93137	0.550131	5.6641	3.28803
Z025E0100	0.946678	0.549277	0.375711	4.54588	0.411166	2.18228	0.527446	6.29396	2.94887
Z025E0101	0.939146	0.533363	0.426619	4.20181	0.455395	2.23668	0.613286	5.66637	3.14499
Z025E0102	0.945835	0.490846	0.214885	5.41123	0.280601	2.95351	0.462681	8.93042	3.70824
Z025E0103	0.936743	0.476114	0.317435	4.81735	0.341728	2.49865	0.541423	7.12906	3.31257
Z025E0104	0.939256	0.505505	0.458527	4.67035	0.46722	1.8279	0.564968	5.877	3.1935
Z025E0105	0.935771	0.497041	0.380516	4.68604	0.398991	2.25613	0.553419	6.38014	2.87295
Z025E0106	0.942676	0.5323	0.364402	5.36194	0.396233	2.26718	0.555401	6.89057	3.60658
Z025E0107	0.934733	0.51295	0.412743	5.1395	0.30908	2.41941	0.495671	7.17462	3.6854
Z025E0108	0.93545	0.415563	0.380292	4.95292	0.398964	2.0713	0.509507	6.70199	3.78341
Z025E0109	0.948321	0.51087	0.395825	3.79555	0.387144	2.16382	0.651774	5.53739	2.9188
Z025E0110	0.943091	0.451541	0.400115	4.98449	0.426349	2.00944	0.537073	6.54188	3.58929
Z025E0111	0.944477	0.528146	0.446521	4.35907	0.4372	1.87895	0.651403	5.44307	2.855
Z025E0112	0.944998	0.587587	0.432435	4.38747	0.400362	2.05931	0.632317	5.68119	2.85202
Z025E0113	0.939504	0.535654	0.359463	4.47885	0.407601	2.55346	0.539462	6.85922	3.54355
Z025E0114	0.940856	0.392534	0.469042	5.07618	0.422069	1.74749	0.626378	6.11442	2.5456
Z025E0115	0.944854	0.444256	0.385369	4.81128	0.389049	2.0139	0.526459	6.57118	3.36433
Z025E0116	0.942549	0.489009	0.346738	4.37523	0.424077	2.12977	0.638653	5.89536	3.05572
Z025E0117	0.942212	0.507239	0.429921	4.11352	0.451469	2.01981	0.557541	5.78879	3.06201
Z025E0118	0.938706	0.486447	0.390122	4.4999	0.436975	1.98776	0.541081	6.09524	3.30226
Z025E0119	0.942229	0.49685	0.426931	4.80068	0.432767	1.96359	0.647362	5.73951	3.00626
Z025E0120	0.946824	0.496621	0.41916	3.74551	0.453186	1.83933	0.616922	5.24749	2.64843
Z025E0121	0.932936	0.442667	0.410257	3.81966	0.461625	1.79165	0.683336	4.9581	2.87246
Z025E0122	0.942345	0.565273	0.411159	5.2398	0.426031	2.22647	0.557321	6.73166	3.47237
Z025E0123	0.94081	0.56703	0.419221	4.95533	0.438158	2.18551	0.530531	6.59751	2.90287
Z025E0124	0.933505	0.409396	0.42027	4.96359	0.378973	1.93048	0.527401	6.71838	3.41242
Z025E0126	0.947048	0.540876	0.357484	5.00328	0.435616	2.34693	0.585834	6.58441	3.15198
Z025E0128	0.944255	0.548948	0.371858	5.12573	0.432057	2.15472	0.598976	6.71682	2.6419
Z025E0129	0.946835	0.511217	0.394532	3.91618	0.457476	1.8739	0.584901	5.32174	2.73394
Z025E0130	0.937198	0.471091	0.334483	4.94912	0.429766	2.32814	0.534316	6.82289	3.11398
Z025E0131	0.930684	0.50392	0.452181	3.91488	0.426038	1.86508	0.624587	5.76762	2.52999
Z025E0132	0.956701	0.511912	0.49972	3.72573	0.444483	1.81981	0.624554	4.79395	2.13258
Z025E0133	0.938329	0.432032	0.431609	4.28655	0.376114	1.84844	0.581902	5.62327	2.81299
Z025E0135	0.946764	0.426932	0.344552	4.79388	0.270106	2.01088	0.507091	6.89871	2.85525
Z025E0136	0.935955	0.557394	0.415559	5.15109	0.394333	2.24444	0.539022	6.55892	3.15613
Z025E0137	0.938484	0.54186	0.40053	5.30662	0.30521	2.08434	0.587433	6.44933	2.86325
Z025E0138	0.945444	0.456365	0.396089	4.8215	0.355074	2.12244	0.519208	6.4798	3.30247
Z025E0139	0.942332	0.516706	0.288271	5.11133	0.402491	2.45412	0.465898	7.75505	3.35466
Z025E0140	0.933391	0.524793	0.358579	5.53672	0.409907	2.23855	NA	7.34637	3.29154
Z025E0141	0.937723	0.478994	0.402105	4.31276	0.453413	2.04896	0.640642	5.68958	3.39914
Z025E0142	0.949297	0.576271	0.471027	2.79834	0.436414	1.90352	0.700224	4.33773	2.58727
Z025E0143	0.940704	0.661857	0.449945	5.5639	0.491038	1.88515	0.631749	6.14012	3.08859
Z025E0144	0.942368	0.517816	0.311965	4.45875	0.373095	2.64376	0.541324	7.2839	3.29626
Z025E0145	0.945721	0.526264	0.460501	4.45535	0.43893	1.79387	0.659153	5.22871	2.54651
Z025E0147	0.939592	0.430462	0.415684	4.34995	0.422344	1.78743	0.584178	6.03921	3.28663
Z025E0148	0.943946	0.424744	0.396747	4.31013	0.409967	1.98699	0.573628	5.9391	3.04994
Z025E0149	0.949647	0.540311	0.359526	5.59547	0.454307	2.50257	0.575655	7.0334	3.93369
Z025E0150	0.928246	0.497004	0.348917	4.76516	0.366822	2.00382	0.571184	6.99837	3.5154
Z025E0152	0.940428	0.41504	0.405224	4.71408	0.398674	2.01714	0.532038	6.24239	3.78255
Z025E0153	0.920328	0.523041	0.38673	5.3177	0.402585	2.02453	0.49274	7.0183	3.57646
Z025E0154	0.941494	0.535847	0.429921	4.33217	0.351966	2.081	0.613529	5.7871	2.75274
Z025E0155	0.946903	0.527919	0.449122	3.47389	0.449789	1.87643	0.694927	4.93867	2.54441
Z025E0156	0.935619	0.489282	0.337359	6.36947	0.372893	2.33451	NA	7.98353	4.11785
Z025E0157	0.943058	0.516926	0.395772	4.7108	0.418089	2.47628	0.578016	6.52294	3.05196
Z025E0158	0.935256	0.535892	0.409293	4.33432	0.29879	2.06603	0.565557	6.30228	2.86228
Z025E0159	0.943397	0.527153	0.324562	6.3961	0.369034	2.575	0.453051	8.26748	3.86264
Z025E0160	0.94229	0.509872	0.463173	4.1465	0.386049	1.70315	0.623071	5.39192	2.8738
Z025E0161	0.938172	0.45936	0.311278	4.8785	0.313118	2.41463	0.487719	7.20111	3.5735
Z025E0162	0.93641	0.428801	0.38174	4.64182	0.338748	2.00949	0.531539	6.46694	2.87105
Z025E0163	0.932097	0.391372	0.414906	4.27382	0.38536	2.05432	0.505632	6.3747	3.70821
Z025E0164	0.946383	0.483382	0.407688	4.01383	0.386155	1.90583	0.60684	5.60228	2.99197
Z025E0165	0.949015	0.474928	0.350815	4.33953	0.324063	2.34234	0.545492	6.41936	2.87145
Z025E0166	0.935667	0.531461	0.37916	3.78287	0.342968	1.80026	0.643289	5.51556	2.59708
Z025E0167	0.933726	0.44689	0.297709	5.93405	0.412778	2.51537	NA	8.405	3.72107
Z025E0168	0.932599	0.361155	0.369694	4.20667	0.346814	1.92962	0.603977	6.14302	2.86125
Z025E0169	0.942676	0.460697	0.285772	3.95323	0.395952	2.70764	0.618285	6.55008	3.79025
Z025E0170	0.933953	0.466511	0.340282	4.5965	0.369482	2.48548	NA	7.79051	3.91253
Z025E0171	0.94254	0.519824	0.379407	5.46916	0.461131	2.30192	0.602379	6.93835	3.09074
Z025E0172	0.933153	0.442523	0.381351	4.90313	0.387191	2.00923	0.591354	6.60394	3.45688
Z025E0173	0.940854	0.489371	0.437614	4.75632	0.465607	1.72939	0.563302	5.85	2.91848
Z025E0174	0.927263	0.379416	0.40347	6.50861	0.296896	1.77161	NA	7.78322	2.87759
Z025E0175	0.943514	0.527736	0.416746	4.43891	0.383124	1.90231	0.619554	5.67087	3.14403
Z025E0176	0.93597	0.44818	0.362935	3.50997	0.236047	1.95282	0.52713	6.20453	3.53469
Z025E0177	0.935058	0.454074	0.432394	5.56807	0.353076	2.15372	0.567542	6.85706	NA
Z025E0178	0.94478	0.559873	0.39816	4.73665	0.406204	2.17928	0.614635	6.05025	2.75413
Z025E0179	0.947988	0.517885	0.451866	3.4067	0.425074	1.60634	0.672882	4.47669	1.887
Z025E0180	0.940408	0.44997	0.375733	5.28512	0.382215	1.96086	0.546889	6.59619	3.4007
Z025E0181	0.934232	0.501762	0.332107	5.10895	0.371131	2.59307	0.550981	7.14475	3.70961
Z025E0182	0.944329	0.485204	0.266087	4.60054	0.314434	2.4243	0.508717	7.09357	3.51491
Z025E0183	0.938052	0.410811	0.37653	3.94571	0.345067	1.9513	0.54876	6.12313	2.86329
Z025E0184	0.941712	0.519606	0.39143	4.80986	0.401526	2.4801	0.628889	6.47466	3.18999
Z025E0185	0.947283	0.560588	0.342974	4.78055	0.412437	2.10139	0.520814	6.55744	3.02213
Z025E0186	0.945734	0.599538	0.399877	3.96299	0.456459	2.00198	0.640085	5.42492	3.62318
Z025E0187	0.936903	0.518548	0.400539	4.13411	0.363697	1.8779	0.547517	5.72839	3.04837
Z025E0188	0.940489	0.414456	0.382811	4.53663	0.344536	2.09629	0.513156	6.45846	2.86877
Z025E0189	0.944972	0.527096	0.351621	4.22618	0.383787	2.25897	0.617327	5.99976	2.84118
Z025E0190	NA	NA	0.400182	7.4549	0.363489	2.32378	NA	10.1311	3.3063
Z025E0191	0.938757	0.509245	0.38553	5.08677	0.352158	2.25884	0.541167	7.34207	3.18516
Z025E0192	0.9408	0.56928	0.280451	3.96911	0.358192	2.7225	0.582284	6.80407	NA
Z025E0194	0.93238	0.418151	0.396996	4.06443	0.424555	2.03875	0.615208	5.82846	3.1615
Z025E0195	0.933401	0.512546	0.400569	4.65054	0.445906	2.10918	0.585845	6.32028	3.11097
Z025E0196	0.942806	0.480438	0.376099	4.13177	0.345994	1.65566	0.506503	5.85341	2.07446
Z025E0197	0.9476	0.435461	0.416391	3.71975	0.440723	2.00819	0.639992	5.20064	2.17035
Z025E0198	0.946625	0.440084	0.399694	5.08746	0.454437	1.9654	0.525722	6.50874	2.8586
Z025E0199	0.951495	0.445293	0.36111	4.06815	0.32855	2.15281	0.540899	6.08109	2.8393
Z025E0200	0.95028	0.578651	0.452221	4.55654	0.426114	1.85919	0.643369	5.6883	2.65239
Z025E0211	0.933977	0.470589	0.316057	5.6738	0.379504	2.59803	0.494386	7.80378	3.89307
Z025E0213	0.94087	0.440529	0.393275	4.3703	0.335611	2.09427	0.54347	6.49938	3.74694
Z025E0218	0.939494	0.484127	0.345673	5.32694	0.42625	2.474	0.537655	7.27336	3.88248
Z025E0226	0.944974	0.536066	0.39283	3.94778	0.416314	1.98173	0.553227	5.67787	2.7817
Z025E0238	0.942201	0.499009	0.424731	4.43923	0.452285	1.82844	0.636599	5.60446	3.1003
Z025E0245	0.951179	0.534044	0.411077	3.81439	0.406126	1.9006	0.609392	5.15242	2.85419
Z025E0246	0.935845	0.522274	0.393208	4.95208	0.402657	2.08535	0.614537	6.37162	3.15319
Z025E0250	0.944785	0.468484	0.40853	4.76004	0.399244	1.74421	0.575065	5.9311	2.63822

## Sheet: UntransformedBLUEs
Table S2b: Untransformed best linear unbiased estimators (BLUEs) for grain carotenoid traits and visually scored kernel color in 10 families of the US maize Nested Association Mapping (NAM) panel. Trait names are as written (α = a, β = b), unless shortened as follows: zeinoxanthin (zeino), total carotenoids (total_carot), kernel color (traitKC), β-cryptoxanthin (b_cryp).
GenoCode	a_carotene	b_carotene	b_cryp	lutein	phytofluene	zeaxanthin	zeino	total_carot	traitKC
Z001E0001	0.285172	0.631429	1.66023	9.15245	0.225672	8.48569	1.25792	21.4441	6.59762
Z001E0002	0.893986	0.798347	1.55806	14.3606	1.238	7.58862	1.98484	30.8918	6.593
Z001E0003	0.359309	0.539752	0.51963	10.6001	0.141889	4.93804	1.21511	16.6012	3.09243
Z001E0004	0.149794	0.223063	0.234243	7.59346	0.535374	2.94826	0.15413	11.3047	4.09801
Z001E0005	0.264115	0.794163	2.07012	13.3128	0.135896	10.3178	2.0687	28.8364	6.39545
Z001E0006	0.026949	0.079773	0.585562	11.8165	0.00645939	5.72129	0.86481	17.8844	5.53142
Z001E0007	1.37963	0.280644	0.70788	11.2741	1.27822	5.22731	0.83864	27.3937	5.09956
Z001E0008	0.578781	0.766868	1.61634	9.89195	-0.119414	7.184	0.905073	21.546	5.62019
Z001E0009	1.1461	0.724213	1.87237	14.3783	0.977808	4.85023	2.12154	29.3642	5.65048
Z001E0010	0.808952	0.0931652	1.28906	8.90843	0.753663	4.33024	0.855493	19.9177	3.65606
Z001E0011	0.785427	0.312688	0.990114	8.99135	0.0970778	4.76365	1.71486	20.8598	5.56591
Z001E0012	0.342695	1.87137	NA	18.0501	NA	8.18183	2.89355	36.2449	6.06924
Z001E0013	0.73064	0.237518	0.769138	12.4366	0.836617	5.78861	1.13833	27.0492	5.11025
Z001E0014	0.890319	0.423212	0.582937	13.9931	-0.000142428	7.18666	0.459839	27.4661	5.65946
Z001E0015	0.721754	0.880709	1.51313	9.71884	0.0772025	8.18144	1.66121	23.5242	5.65786
Z001E0016	0.509111	0.255004	0.615114	13.9845	2.35699	3.64953	1.53365	27.0856	5.09706
Z001E0017	0.744547	0.163427	0.861651	13.5367	0.131705	4.82071	2.39416	27.5578	4.61112
Z001E0018	1.06407	0.631761	NA	10.0515	NA	6.32666	NA	28.1073	5.55107
Z001E0019	1.355	1.46667	1.00738	13.2442	0.429747	9.83553	0.94585	27.5276	6.1163
Z001E0020	0.988784	0.305118	0.975691	14.3314	1.14082	6.69287	0.489625	26.9385	6.50384
Z001E0021	-0.511153	0.406816	0.532316	8.74621	0.660016	5.83488	0.137496	20.2313	4.57941
Z001E0022	0.450548	0.207939	1.79767	9.41029	0.243823	5.74143	1.63674	19.4225	6.6095
Z001E0023	1.65341	0.533131	0.755762	12.5197	1.46579	4.66727	1.63901	24.7293	6.09222
Z001E0024	2.62295	1.1987	1.54616	18.1324	2.2795	5.79885	3.28474	36.2002	6.73684
Z001E0025	0.113817	-0.0171483	0.25104	8.67481	2.08729	5.55489	0.751436	16.9046	5.10347
Z001E0027	0.282645	-0.0177981	0.543022	8.41562	0.0198233	3.77411	0.641459	12.9395	5.10028
Z001E0028	0.371746	0.0797554	1.62457	8.35843	0.276712	4.93457	0.905562	14.3043	6.09459
Z001E0030	0.517557	0.166326	1.36667	10.8329	0.229817	6.31526	2.78723	24.9012	6.73297
Z001E0031	1.0103	0.418644	0.989928	13.1677	0.163049	5.29265	2.49658	24.9131	5.55556
Z001E0032	0.883758	0.61028	0.98118	11.8501	0.120494	7.44163	2.0862	28.1489	5.26648
Z001E0033	2.20517	1.13641	1.21306	14.4283	1.17341	8.60657	2.26966	34.8908	5.72495
Z001E0034	1.53337	0.70154	1.91168	17.9903	1.99437	7.58648	3.24608	34.4476	6.32813
Z001E0036	0.212427	0.256657	1.40713	12.2907	2.33327	9.60828	1.06864	26.7002	NA
Z001E0037	0.967105	0.540706	0.731833	12.9243	2.75565	6.3537	2.13955	29.5649	5.71732
Z001E0038	1.02531	0.400199	1.05187	9.96666	0.483519	9.4607	1.06297	25.046	5.09354
Z001E0039	0.367725	0.0905386	1.13591	16.1986	0.166383	7.10836	2.3465	28.2837	5.11092
Z001E0040	1.81139	0.501869	0.679448	15.6971	3.46258	8.13307	0.766401	33.5388	6.37475
Z001E0041	0.61356	0.160922	0.819518	11.1057	0.0100135	4.98783	1.3884	18.5688	4.54799
Z001E0042	1.02545	0.773689	1.09377	14.1739	0.134966	6.82447	2.27705	25.4154	5.10097
Z001E0043	0.211062	0.428907	0.33699	6.97211	NA	4.35183	0.63019	16.9159	NA
Z001E0044	0.341159	0.183406	0.557535	12.8511	0.455753	6.79252	0.837934	21.2021	5.09865
Z001E0045	0.275077	0.701495	1.35405	13.6704	0.00680781	6.3707	2.49958	27.0061	6.05546
Z001E0046	0.113049	0.388979	0.823793	9.53899	0.0212616	5.98412	0.215025	18.1681	6.14024
Z001E0047	1.30024	0.745865	1.45657	12.0922	NA	4.96442	2.31363	23.8568	5.43989
Z001E0048	0.714685	0.321006	0.634828	9.90395	0.0284329	4.04106	1.29995	20.271	5.09402
Z001E0049	0.355139	0.255723	0.248748	5.87601	0.275406	4.8559	0.149267	12.3883	4.00883
Z001E0050	0.10426	0.599219	0.48116	10.3278	0.241611	5.94807	0.592454	17.5367	5.10691
Z001E0051	0.923581	0.556644	0.975198	12.1094	0.0667308	6.73041	2.25897	24.4754	4.86724
Z001E0052	0.235346	0.247716	0.503211	8.71335	0.372349	4.51058	0.358418	16.4145	4.1233
Z001E0053	1.57866	1.01695	1.44364	17.6845	1.29819	6.18342	2.80248	31.6584	5.7019
Z001E0054	0.860712	0.459108	0.8388	9.84344	0.272712	4.52814	1.58949	17.8558	5.3651
Z001E0055	0.423967	0.304069	1.0755	18.238	0.822381	7.20542	1.74494	30.9542	5.67042
Z001E0056	0.212836	0.226845	0.188032	9.61757	0.180656	3.2248	1.34577	17.3894	5.41303
Z001E0057	0.287544	0.205398	0.558359	7.41049	0.603204	4.98767	0.296574	13.6323	4.06438
Z001E0058	0.556673	0.396858	0.929287	11.9049	0.719774	5.48472	1.2915	19.4902	5.09717
Z001E0059	1.22374	0.288648	1.93652	17.2288	0.0426649	7.00791	3.21303	32.7909	NA
Z001E0060	0.834612	0.362634	1.40419	15.1889	NA	6.79063	5.42824	33.9144	6.31746
Z001E0061	0.331785	0.185957	2.16363	14.9606	0.12798	8.37661	1.67972	28.6999	5.08393
Z001E0062	1.15912	0.759565	0.666502	19.3519	1.52509	6.5595	0.917725	33.5615	4.97971
Z001E0063	0.788196	0.341082	0.962595	18.1003	NA	6.44167	1.80193	34.185	6.44843
Z001E0064	0.891328	0.531026	0.5376	14.4806	1.99193	6.97966	0.945936	28.7082	6.59278
Z001E0065	2.19263	0.988257	2.57994	10.2895	0.666833	6.87709	2.99752	27.3653	5.08791
Z001E0067	0.342482	0.315444	0.366803	8.43296	-0.0306646	3.65462	0.812692	16.0508	4.34737
Z001E0068	0.679313	0.298856	0.898227	11.0459	0.500969	4.90621	1.9378	20.7715	5.58777
Z001E0069	0.518938	0.293994	0.885004	10.9542	2.25041	6.4666	1.4134	21.5031	6.4299
Z001E0070	0.425046	0.449026	1.12851	15.2754	NA	5.04824	2.17469	28.3788	5.26061
Z001E0071	0.0635735	0.609207	0.538543	9.42799	0.276479	6.24626	1.28061	20.478	5.85429
Z001E0072	0.227746	0.940142	1.25902	11.3212	0.99733	8.6511	2.25752	28.361	6.32087
Z001E0073	0.976274	0.379074	1.02867	13.3002	1.20247	4.49598	0.910658	24.4841	5.42514
Z001E0074	0.758968	0.196021	0.772164	5.60995	NA	4.20829	0.466522	14.6307	5.24529
Z001E0075	0.223073	0.24778	0.6033	6.00212	0.57073	6.29381	-0.266851	14.0533	4.68374
Z001E0077	2.21328	0.872347	1.92113	13.7974	1.03764	6.90538	2.69778	33.1789	6.06671
Z001E0078	0.469111	0.336922	0.94625	6.65756	0.150625	4.68183	1.23587	15.7783	4.41043
Z001E0079	0.102732	0.310255	0.361672	6.04582	0.776754	4.74202	0.265476	11.324	5.122
Z001E0080	1.15499	1.862	2.12302	11.4304	0.351184	7.31613	1.17243	27.5371	5.32594
Z001E0081	0.107734	0.660759	1.04991	8.7103	2.15484	6.3701	0.929126	19.8984	5.15454
Z001E0082	-0.0286651	0.154724	1.06062	10.757	0.625337	5.43059	1.33779	18.5738	5.06415
Z001E0083	0.847767	0.900535	1.48758	17.437	NA	6.17606	2.00458	28.6767	6.43404
Z001E0084	0.171191	0.0692738	0.288288	7.52827	0.124139	0.860415	0.903692	11.4698	4.09905
Z001E0085	2.27991	0.558439	0.956065	16.8744	1.62371	4.24107	1.16689	33.5395	5.62051
Z001E0086	-0.302251	0.202686	0.470959	3.19375	NA	5.23943	-0.438397	9.92628	5.35274
Z001E0087	1.02625	0.447799	0.439228	11.2512	1.8597	3.83326	0.665741	21.6611	5.34057
Z001E0088	1.25433	0.802143	1.37002	16.5206	0.573413	3.09295	3.50973	28.0016	5.38367
Z001E0089	0.666895	0.110317	0.547064	14.2134	0.306424	5.51163	0.65488	23.148	3.39991
Z001E0090	0.767839	0.510137	0.447468	16.2109	0.594077	5.81336	0.520617	30.1633	6.33489
Z001E0091	1.98649	0.656123	1.18197	11.1968	0.728814	4.14862	2.03053	24.5763	5.96391
Z001E0092	0.182765	0.236958	0.768624	9.84835	-0.23165	6.75794	0.603476	18.2056	6.10351
Z001E0093	1.33191	0.96452	0.800381	14.9636	2.46948	5.50921	1.96668	31.3464	5.71729
Z001E0094	1.05815	0.644778	0.798296	12.3041	NA	5.13098	3.30932	26.3103	5.59022
Z001E0095	0.323868	0.0420621	0.339614	11.1284	0.820161	3.57433	0.597561	17.1833	4.08794
Z001E0096	1.0047	0.717074	1.42385	12.5891	0.994431	5.04215	2.9369	25.4283	4.92142
Z001E0097	1.06335	1.23912	1.00139	15.7956	0.555152	5.7466	2.34321	31.0146	5.12541
Z001E0098	0.617546	0.391946	0.780363	14.5223	2.71099	7.20518	1.79624	28.2397	4.09225
Z001E0099	0.241253	0.409629	0.749812	8.95878	0.0817155	6.62883	0.945186	18.9021	5.30255
Z001E0100	0.615172	0.260544	0.90916	12.2257	2.67557	5.66026	3.89904	26.5786	5.33943
Z001E0101	0.349534	0.0379576	0.862936	9.44159	NA	5.30237	2.00785	19.5113	5.94643
Z001E0102	1.29002	0.405844	0.505055	13.5975	NA	5.86136	1.03837	24.5264	3.96523
Z001E0103	0.741055	0.602731	0.94472	11.2337	2.27534	6.60542	0.673345	24.6415	5.06796
Z001E0104	0.438616	0.323889	1.23897	11.0941	1.38765	7.47961	1.80386	24.7631	6.09379
Z001E0105	0.944383	0.213617	0.655826	9.16478	NA	5.58851	2.87224	22.6691	5.0923
Z001E0106	1.18997	0.306056	1.59123	12.0369	2.07618	6.97053	2.02206	23.2145	NA
Z001E0107	0.271065	0.491677	0.155977	10.1045	1.74365	3.41052	0.453528	14.519	5.59221
Z001E0108	1.29785	0.874349	0.0750257	10.4764	0.0567798	5.14688	1.64921	23.2222	6.08788
Z001E0109	0.235465	0.213608	0.745906	6.42187	0.207564	4.65117	0.915981	15.8197	4.38638
Z001E0110	0.375625	0.548091	0.750717	9.3187	0.166367	6.2501	1.21855	19.4104	5.08456
Z001E0111	0.54976	0.389774	-0.00507459	12.5184	NA	4.7428	0.264999	25.2112	4.76535
Z001E0112	0.410341	0.147417	0.306826	9.30948	3.02931	5.53886	0.920259	18.8068	5.28576
Z001E0113	0.301778	0.120905	0.115737	9.33075	1.35354	3.53126	0.284355	11.3453	4.09271
Z001E0115	0.373654	0.434581	0.616482	9.88257	0.498319	3.4843	1.87929	17.8513	5.40722
Z001E0116	0.17525	0.45129	0.0731136	11.1784	3.26717	4.99343	0.306753	23.9519	5.76978
Z001E0117	0.451963	0.230724	0.197853	5.80256	0.721447	6.54317	-0.157975	16.0424	4.74071
Z001E0118	0.50206	0.228761	0.329975	7.69471	2.9858	4.94653	0.40748	16.167	5.28034
Z001E0119	2.03902	0.589596	1.10064	14.6117	0.212869	5.41486	2.60228	29.4217	5.31554
Z001E0120	0.255369	0.413354	0.440408	13.5018	0.53985	4.22478	1.41869	21.4069	5.52711
Z001E0121	0.25863	0.712943	0.518061	15.0791	0.427709	5.68465	0.188865	25.4026	5.42642
Z001E0122	0.957144	1.15616	0.942051	11.01	NA	4.64586	1.36579	19.6528	5.97661
Z001E0123	1.39601	0.335784	0.835383	11.6637	1.47463	5.53778	1.0866	25.4371	5.98177
Z001E0124	0.780575	0.263517	0.360115	13.3473	0.717699	6.01764	0.647672	22.7089	6.02024
Z001E0125	0.922317	0.497976	2.31997	15.2091	0.505822	7.4944	3.15755	31.1078	NA
Z001E0126	0.51317	0.511693	1.06856	10.3395	0.815817	7.5781	0.957075	23.3367	6.09123
Z001E0127	1.14319	1.05029	1.60358	13.5396	1.00539	8.44291	1.92906	30.7551	5.56634
Z001E0128	0.0812042	0.569306	1.43109	12.5553	2.30734	6.80435	4.7683	28.0829	5.97787
Z001E0129	0.510834	0.522691	1.07337	14.1571	1.39109	7.69615	1.58052	24.6453	5.71745
Z001E0130	0.455963	0.436892	1.91826	11.2957	0.467173	8.02554	0.592173	22.8726	6.01733
Z001E0131	1.25644	0.636623	1.62238	11.563	0.677251	5.51754	3.69473	24.4809	5.78207
Z001E0132	-0.225447	0.102242	0.4462	6.24642	1.77056	4.6679	0.678176	12.0947	3.71348
Z001E0133	0.234776	0.215548	0.873742	9.21608	2.46443	6.03554	0.363646	18.2556	4.56187
Z001E0134	0.282205	0.500295	0.516053	7.83995	0.111264	4.56542	0.986173	14.0041	4.31918
Z001E0135	1.46191	0.756097	0.865534	17.5891	0.167746	5.18291	2.8493	32.3044	5.27582
Z001E0136	0.800214	2.77656	2.92447	15.129	0.397132	10.0789	1.30247	34.251	6.09986
Z001E0137	-0.155333	0.784401	NA	13.7171	NA	6.62883	1.50409	23.6707	5.86925
Z001E0138	0.402201	0.501498	0.443384	11.3569	0.220351	5.33725	0.724614	18.7223	4.59648
Z001E0139	0.604019	0.283633	1.23506	8.32643	0.202397	4.55679	2.26578	18.28	5.39335
Z001E0140	0.243483	1.63909	2.94886	10.3662	0.161878	10.8993	2.43786	30.6357	6.73259
Z001E0141	0.429015	0.224522	0.907322	10.5614	-0.0399077	4.23791	1.44469	19.3524	0.514672
Z001E0143	0.643594	0.611759	0.155412	11.9915	2.23876	5.94939	0.423275	23.9119	5.09522
Z001E0144	1.2034	0.390041	1.05264	13.8902	0.42696	5.03109	2.29921	25.2974	5.68682
Z001E0145	0.783936	0.811291	1.4573	9.51876	0.031373	5.96815	1.30673	19.2258	5.74255
Z001E0146	0.407291	0.58596	1.22021	9.97	1.57522	8.26583	2.08326	23.9329	5.04974
Z001E0147	0.953735	0.606196	0.571257	7.56975	1.55808	6.57549	1.26896	22.4035	6.72548
Z001E0148	0.74929	0.305681	1.0338	14.4951	1.4907	6.95802	1.86681	25.8211	5.36837
Z001E0149	0.311082	0.528752	1.15343	8.12628	0.151748	5.68027	0.772331	17.0176	4.92595
Z001E0150	-0.0663002	0.0159517	0.433722	12.8988	0.128019	7.32098	1.17869	20.8323	4.09614
Z001E0152	0.0712584	0.206291	0.324699	8.47118	0.853073	3.34835	0.585184	14.6385	4.53935
Z001E0153	0.8108	0.314265	1.64918	13.176	-0.0712484	6.83062	2.76027	23.1807	NA
Z001E0154	1.49808	0.411433	2.36632	14.2818	0.315807	10.2128	1.96125	32.1354	6.10351
Z001E0156	0.949309	1.0521	1.16794	10.3379	0.126593	6.93283	1.33523	23.8538	6.33135
Z001E0157	0.586091	0.482876	0.932903	10.2546	-0.0313593	3.86167	0.728937	19.1359	NA
Z001E0158	1.84048	0.794642	0.396609	17.9677	NA	4.56079	3.2224	29.6605	6.5442
Z001E0159	-0.00810492	0.196077	1.22536	17.3179	0.403026	7.65716	1.84832	27.5871	6.09211
Z001E0160	1.52605	0.341935	1.31846	11.6213	0.187824	4.65052	1.58591	27.2894	6.10643
Z001E0161	1.7956	1.95814	1.21689	19.6958	0.543107	8.51882	3.0107	35.1165	NA
Z001E0162	0.11033	0.116416	0.169123	6.54215	0.0661337	4.18585	0.125591	11.8889	3.6856
Z001E0163	0.61511	0.295605	0.845007	12.1386	1.1939	7.53812	1.0989	23.3304	5.49722
Z001E0164	0.829911	0.700827	0.678066	17.3162	NA	6.50841	1.32872	30.2106	6.10166
Z001E0165	1.4187	1.07719	1.51886	16.1495	2.43823	8.50726	3.23865	35.5505	6.63825
Z001E0166	0.347668	0.743704	0.553792	11.6853	1.26627	6.67046	1.1654	22.2363	4.88334
Z001E0167	0.0212903	0.234894	0.249703	6.69087	0.895645	5.34604	0.0464229	13.8183	5.35993
Z001E0168	0.18879	0.504075	0.471873	6.9223	NA	5.52958	0.100935	13.9752	4.38452
Z001E0169	0.242587	0.275149	1.51167	12.3266	0.239992	6.42439	4.35912	26.4667	6.09866
Z001E0170	0.283265	0.507172	0.429194	11.8249	0.0874199	6.85041	1.37962	23.0915	4.93023
Z001E0171	0.28822	0.312611	0.155596	5.97716	2.74348	2.80539	-0.013124	9.28257	NA
Z001E0172	0.176848	0.114223	0.601813	8.14001	0.0252453	5.97448	0.515672	15.3683	4.65025
Z001E0173	0.405367	0.779748	0.714912	11.0712	0.118066	6.42387	0.493983	20.2839	5.01322
Z001E0174	0.465576	0.751682	1.50708	12.9332	0.180514	6.68094	1.63737	23.8602	5.67182
Z001E0175	0.494761	0.502066	0.23849	8.18997	1.21985	4.44714	0.320848	13.3897	5.10129
Z001E0176	0.0816745	0.742522	1.695	6.19392	0.673833	8.14829	0.444525	17.1704	6.15835
Z001E0177	1.03389	0.49156	0.0511234	13.081	0.647455	6.56201	0.399871	28.0125	5.63802
Z001E0178	1.1558	0.800572	1.2495	9.65775	1.21812	5.53813	2.53955	21.2879	4.91491
Z001E0181	0.697564	0.502788	0.958844	15.6269	1.15004	6.27684	1.86422	29.1705	5.54288
Z001E0182	1.3206	0.756763	0.647327	18.1582	1.49705	6.55124	0.871131	31.3102	5.45978
Z001E0183	-0.312144	1.24925	NA	20.5045	NA	10.7384	NA	42.2727	6.45699
Z001E0184	0.496066	1.04338	1.01668	19.3837	0.514045	7.52374	2.64078	34.4786	5.905
Z001E0185	0.0511394	0.0305747	0.870624	12.008	1.81903	5.53405	3.6075	20.993	4.60863
Z001E0186	0.148536	0.591156	0.85826	7.89373	-0.00626897	4.39641	-0.0469564	16.4805	5.60425
Z001E0187	0.157018	0.884867	1.21936	10.0422	0.155945	5.18959	1.06381	20.3512	5.63177
Z001E0188	0.724469	1.43072	1.20333	7.95118	0.203812	7.029	0.252304	18.3725	5.5932
Z001E0189	2.06627	1.23594	2.58549	10.1311	0.54905	6.40333	3.04782	27.7692	5.10362
Z001E0190	1.01513	0.812195	0.793401	9.78716	0.765196	4.84108	1.84074	18.4015	4.09947
Z001E0191	0.528858	-0.0272785	0.950544	16.4044	0.280473	5.70339	1.681	25.7689	5.20556
Z001E0192	0.291977	0.532447	1.3695	6.11722	0.126478	6.45462	0.517948	16.6025	5.25858
Z001E0193	0.436635	0.446036	0.332101	7.738	0.168348	5.57325	1.13805	17.0107	6.26755
Z001E0194	0.550063	0.0980381	0.488931	13.576	0.464298	6.54881	1.42069	22.4245	5.50203
Z001E0195	0.555755	0.509848	0.941812	15.6554	NA	8.27786	1.78643	31.6232	5.75444
Z001E0196	0.294404	0.385022	0.450979	9.92572	0.0128029	4.6441	1.36317	17.2926	4.76213
Z001E0197	0.248532	0.194419	0.902043	11.2736	0.59289	5.40135	1.53371	21.8885	4.32742
Z001E0198	1.1723	0.770583	1.74911	8.87672	0.708618	4.67575	2.57128	21.7197	5.58902
Z001E0199	1.94229	0.707652	1.61218	14.6439	0.10306	5.75716	1.11933	29.4083	6.14377
Z001E0200	1.77696	0.688742	0.976452	13.0424	1.00811	4.2114	1.20252	26.5011	6.16634
Z001E0215	1.28539	0.420142	0.882153	13.9175	0.102083	5.03544	2.13847	24.2645	5.00198
Z001E0229	1.0711	1.45093	3.16692	13.4691	1.92968	10.401	4.03416	35.4409	NA
Z003E0001	3.34142	0.620907	1.39805	20.9725	-0.0183159	7.42001	2.86493	37.2473	6.89446
Z003E0002	NA	1.93027	1.34	31.5813	1.30668	7.04096	1.646	47.5387	6.56388
Z003E0003	2.04655	1.60862	1.12251	15.4323	0.345981	7.43002	1.16306	28.8859	6.49529
Z003E0004	0.788484	0.919971	1.82073	16.7542	0.0792805	5.57021	1.73258	26.761	6.72847
Z003E0005	0.979636	1.94785	6.21377	9.41879	2.51807	17.4326	0.915485	39.9743	NA
Z003E0006	2.1103	1.31286	1.32566	24.6086	0.697439	8.09851	1.04445	39.8184	6.45198
Z003E0007	1.1563	0.706063	0.972184	12.3308	0.838071	5.36614	1.04714	23.5317	6.07318
Z003E0008	1.38117	2.29565	5.69585	9.90837	0.164856	19.3963	0.468207	41.8676	10.3064
Z003E0009	2.14461	1.45892	2.22482	19.7145	0.432688	10.868	3.85506	41.5585	8.04669
Z003E0010	2.41236	2.15989	2.43626	21.8803	1.0539	9.50514	8.37209	50.0274	7.28766
Z003E0011	2.56368	1.27526	3.2105	16.4062	1.40991	7.27774	4.72329	34.7794	7.57263
Z003E0012	0.828585	3.06817	7.02261	3.51019	1.11783	24.433	0.372927	42.7646	10.0315
Z003E0013	2.30701	1.68991	1.45522	13.3389	-0.13174	6.23477	2.60422	28.1652	6.0658
Z003E0014	2.79323	1.13221	1.49523	14.7873	0.256169	5.8179	2.92089	30.7371	6.90278
Z003E0015	1.6069	2.12159	3.73007	9.47129	0.658832	14.5506	1.14938	35.5467	8.25702
Z003E0016	0.698574	1.53028	5.99622	8.73211	0.436485	17.0785	1.18078	34.3442	NA
Z003E0017	2.33651	1.13026	0.8744	14.5835	0.44167	5.97445	2.07234	29.8035	6.69844
Z003E0019	2.15875	0.759317	3.39276	5.05815	0.247905	10.6641	0.866703	23.4173	8.52723
Z003E0020	2.24328	1.4246	2.85301	11.6191	0.56261	8.58699	3.30817	30.8421	6.2783
Z003E0021	2.19836	0.872068	2.22766	12.4034	0.394972	5.93288	3.97581	28.4597	6.23729
Z003E0022	NA	0.371558	2.61444	18.384	0.694108	10.4577	4.90419	47.2687	8.59387
Z003E0023	2.45073	1.71978	2.55335	15.9623	0.568066	8.51232	6.37176	40.4207	6.80013
Z003E0024	2.0426	1.06513	3.24515	18.0354	1.11673	15.0269	0.964178	43.8457	9.47532
Z003E0026	1.72195	2.40769	NA	15.9849	1.73272	17.783	1.39889	48.6742	8.58856
Z003E0027	NA	2.86508	4.1149	18.5104	1.69362	10.2153	5.52595	47.2654	6.57058
Z003E0029	3.34341	1.38015	1.63327	21.5542	0.393799	6.7858	2.861	38.8605	6.93897
Z003E0030	2.8233	1.312	1.22862	20.2977	0.349219	7.13462	2.76691	36.7621	7.02193
Z003E0031	2.88163	1.81976	3.32769	21.6363	0.96208	7.54782	7.16375	48.1586	6.61248
Z003E0032	0.824286	2.89247	5.41011	8.26673	1.07054	15.2814	0.492776	35.7296	7.04135
Z003E0033	1.6002	1.22507	2.17828	14.7761	0.154852	9.43211	1.97998	31.794	6.89377
Z003E0034	0.679322	1.07304	4.48835	6.93857	0.394669	14.1554	0.556917	26.3182	6.88664
Z003E0035	-0.200108	3.9254	8.27815	6.60844	0.841181	18.0662	0.489168	41.1264	10.1404
Z003E0036	2.79492	1.88806	1.97926	15.928	0.687165	9.34057	2.68404	33.2671	7.58044
Z003E0037	1.5738	4.11668	4.47883	11.3061	0.919156	13.9881	1.66777	37.5988	8.56834
Z003E0038	0.716916	0.795112	2.07844	18.8915	0.205451	8.2758	1.58353	32.069	7.81104
Z003E0039	2.72108	1.63594	2.45945	16.8756	0.812137	9.22167	3.17911	37.0169	6.94309
Z003E0040	1.71443	0.781738	0.951923	12.5531	-0.070233	3.69277	4.19638	25.9724	5.26454
Z003E0041	2.2141	0.317712	1.92452	18.0909	1.11393	10.0975	2.00642	38.8763	7.58351
Z003E0042	3.31704	0.504706	1.2756	23.2211	0.461307	4.75453	2.47886	39.4919	6.6246
Z003E0044	0.846533	2.50992	5.1008	7.70358	-0.149228	20.7719	0.897377	38.0909	NA
Z003E0045	2.03089	1.73417	2.70808	NA	0.509693	11.7724	NA	63.3927	7.04583
Z003E0046	2.85803	1.27813	1.84546	15.911	0.371353	5.4651	3.207	33.6808	6.53835
Z003E0047	2.99737	1.1486	3.19708	21.0336	1.12264	13.7065	7.84858	55.7002	7.6488
Z003E0048	1.12365	2.72692	2.93869	6.22872	0.361241	14.1864	0.540853	28.0029	7.25059
Z003E0049	NA	1.9687	1.65361	24.0706	1.39686	5.31127	0.955335	36.6991	7.5609
Z003E0050	1.45769	1.49947	3.3043	17.4997	0.605947	9.67535	6.25047	40.5209	7.26578
Z003E0051	NA	1.86843	1.86856	19.3815	0.322072	10.6497	4.12068	45.3224	7.56967
Z003E0052	2.38218	2.23589	4.30284	25.5575	1.18162	12.2602	4.79793	50.6162	7.64962
Z003E0053	0.514701	1.31281	3.37431	9.93523	0.402516	16.5088	0.57388	34.5191	NA
Z003E0054	2.6429	1.34366	3.11995	30.3943	0.950727	8.26376	3.64071	48.7248	7.00043
Z003E0055	2.30892	0.182715	1.83246	12.0831	1.07362	8.54717	4.13667	33.1764	7.57316
Z003E0056	1.08637	3.25773	3.22571	9.07787	0.0598511	22.4919	0.255804	39.7901	9.82406
Z003E0057	1.56501	1.23208	0.987068	15.5174	0.348121	6.9616	1.49656	28.7523	7.13842
Z003E0058	2.03431	0.507948	1.6783	29.1652	0.83818	7.94516	4.24398	45.4316	8.45697
Z003E0059	0.937531	1.98597	7.35835	6.4988	0.772305	30.3333	0.639946	48.8918	8.63367
Z003E0061	1.04851	4.16946	5.00929	13.0878	1.49897	17.7282	0.62392	44.8133	8.58181
Z003E0063	2.70072	2.34301	2.41288	27.1122	0.893712	9.58818	4.3672	51.4183	7.07552
Z003E0064	NA	1.38995	1.44439	30.0068	1.03987	5.64556	1.7192	44.6497	7.56895
Z003E0065	NA	NA	3.31174	17.0659	1.31447	12.116	4.97833	45.6658	NA
Z003E0066	1.51095	2.44623	2.90385	17.3985	0.431597	15.0584	3.43418	44.1238	7.39946
Z003E0067	2.76368	1.40597	1.54097	16.5263	0.169293	6.85642	3.86719	36.0269	6.29536
Z003E0068	NA	3.02399	2.68338	26.4028	1.1823	10.5948	8.738	55.6062	7.56928
Z003E0069	1.86744	1.09048	0.97017	18.0334	0.11583	6.06799	1.93258	30.2742	6.4877
Z003E0070	NA	0.190796	1.97184	19.7008	0.44973	9.2971	7.67677	48.2496	6.57321
Z003E0071	1.70169	NA	4.83736	5.82208	0.670732	23.0797	0.405673	40.7002	NA
Z003E0072	0.473345	2.54343	3.60742	3.14291	1.24086	18.1407	0.266496	29.3085	7.8599
Z003E0073	2.64451	2.02588	4.26166	17.5767	1.43547	11.099	7.04038	44.2882	7.58176
Z003E0074	2.82969	1.49607	2.08316	33.5328	1.05279	12.422	2.57981	57.4942	8.32285
Z003E0075	0.0664349	-0.104458	1.42325	30.1916	-0.132661	13.85	2.65621	51.1752	7.07598
Z003E0076	0.473977	1.22519	1.81553	12.6384	-0.0435022	5.2318	1.25821	26.3635	6.08237
Z003E0077	1.29376	2.21236	3.09591	7.73424	0.519292	13.1561	0.703715	30.3442	NA
Z003E0078	NA	1.72889	1.82905	NA	0.811616	11.5053	3.00975	61.3524	7.57966
Z003E0079	2.11882	0.837379	1.6757	30.8103	1.47236	10.4062	1.27062	48.0714	6.65425
Z003E0080	1.62929	2.81092	4.96462	7.39677	0.979203	24.4231	1.27092	43.5479	10.0705
Z003E0081	1.26532	1.95331	4.91621	10.7994	0.749413	19.9228	1.05085	41.5895	10.04
Z003E0082	2.21	1.0213	2.03015	22.0945	0.471589	10.1442	1.69226	42.0731	7.57517
Z003E0083	1.10517	NA	5.26422	11.0598	0.191263	19.2802	0.253117	40.7087	NA
Z003E0084	2.32103	1.49226	1.75389	16.0572	0.0632377	7.71249	1.24822	31.1266	7.09715
Z003E0085	0.987577	3.29196	7.35944	11.0179	1.3423	26.6091	0.807933	52.0219	NA
Z003E0086	2.99761	1.22354	1.55288	34.5834	0.589415	12.542	2.66327	56.7377	7.09479
Z003E0087	NA	2.80805	3.31311	27.211	1.79559	8.55953	1.65817	51.7978	7.5694
Z003E0088	2.36699	0.968831	1.34011	21.0152	0.0119518	5.07657	2.28324	32.6394	5.92826
Z003E0089	1.65913	3.01072	3.63898	11.4374	1.42567	25.765	0.79453	51.396	NA
Z003E0091	1.15848	3.03376	3.02679	14.7596	0.428011	14.4444	1.28484	39.7584	6.86905
Z003E0092	0.565879	2.03952	6.24284	12.8675	1.4314	22.0251	2.02624	47.1143	8.99904
Z003E0093	0.198913	3.05617	7.37708	11.4642	1.27642	27.2195	1.30383	54.2402	10.8262
Z003E0094	0.681826	0.534961	1.94403	18.0499	0.67058	6.70499	1.67223	30.4745	6.96448
Z003E0095	2.5074	1.33872	2.67389	13.7429	0.222358	11.349	6.20445	39.1076	6.51766
Z003E0097	0.55344	1.4859	2.03299	3.7323	0.245281	13.6781	0.292542	20.8279	7.24691
Z003E0098	2.54754	1.68088	1.93771	15.186	0.819621	6.27845	1.78167	29.5234	6.58883
Z003E0100	1.73875	3.29025	6.18273	15.437	1.59212	18.2469	1.15665	47.5919	9.24512
Z003E0101	0.308733	2.11206	5.44956	8.58225	0.252878	23.7423	0.345907	39.6538	NA
Z003E0102	NA	3.72411	2.85889	14.7379	0.245456	10.2232	5.47322	41.1128	8.0673
Z003E0103	2.50654	1.20194	3.00665	17.274	0.293692	8.82361	3.45201	39.7528	7.12017
Z003E0104	0.621868	2.57913	4.34316	8.6114	0.451485	26.4023	0.741021	43.7588	8.64314
Z003E0105	1.07419	3.26153	9.00372	5.46491	1.66579	32.2958	0.651875	52.2006	11.3142
Z003E0106	1.31518	NA	4.90508	8.18197	1.32676	23.4997	0.607485	42.4853	8.56441
Z003E0108	1.09784	3.09919	7.0366	4.7801	0.910685	15.2461	0.406141	30.633	NA
Z003E0109	2.57239	1.39684	1.93965	14.4926	-0.0431712	9.29082	4.73144	39.2106	7.27169
Z003E0110	0.0574589	0.232843	3.57235	5.75613	-0.108498	13.4192	0.419184	23.2009	7.56413
Z003E0111	0.434617	1.77177	3.50563	3.11622	-0.0575337	12.4013	0.338397	23.2537	6.5987
Z003E0112	2.28244	2.06605	6.89222	6.69453	0.951237	21.1162	0.881928	42.0931	10.6155
Z003E0113	2.86002	1.23105	1.85588	20.2672	1.77458	8.77234	1.50677	42.0318	6.82068
Z003E0114	2.16195	1.54576	2.23522	14.6361	-0.0524256	6.62105	2.99316	28.2822	6.23287
Z003E0115	1.5048	0.995566	1.25386	20.3743	0.285603	7.32922	0.735511	32.2184	6.57009
Z003E0116	-0.0317172	1.76459	NA	1.03902	0.241311	11.7195	0.0415025	20.386	6.86791
Z003E0117	0.327773	2.52925	4.29291	4.12432	0.21828	15.5505	0.24867	26.876	7.10809
Z003E0118	0.821995	1.64194	1.64202	3.43807	-0.157145	9.8845	0.237127	18.901	7.57546
Z003E0119	0.994357	0.647829	1.42909	12.9774	1.82114	5.5225	2.86738	26.1204	6.49541
Z003E0120	1.48735	0.647174	0.556796	14.612	-0.195925	4.85921	1.18619	24.4313	5.57292
Z003E0121	1.10781	0.38489	0.481387	14.2758	0.0664723	4.53064	0.709348	23.1254	6.45297
Z003E0122	0.753219	2.05562	5.91604	4.76974	0.338871	15.2146	0.64226	32.4344	8.90077
Z003E0123	0.619711	2.16049	4.45663	6.70078	1.31555	12.5322	0.909289	30.1703	7.00375
Z003E0124	1.4272	1.13394	1.32999	17.5887	0.394601	6.2044	3.09424	32.3885	6.84511
Z003E0126	0.300241	1.18866	1.61577	5.25695	-0.221199	6.43034	0.258976	16.8032	5.59295
Z003E0127	1.62101	1.59306	2.46849	23.8004	0.761227	12.8876	1.72757	45.5304	8.37317
Z003E0128	1.01508	1.61481	3.9419	16.0384	0.99486	10.5136	3.45251	38.971	6.59989
Z003E0129	1.21918	2.16033	4.10116	4.56762	0.329377	15.1198	0.414997	26.4623	8.17927
Z003E0130	1.39097	1.03565	1.50867	19.3242	0.192963	6.40294	1.52721	30.8504	7.12924
Z003E0131	4.15045	1.88977	2.68565	31.501	0.44949	11.7162	3.32769	57.31	7.31147
Z003E0132	0.567703	3.68081	7.12829	6.61214	1.15778	23.8522	1.39365	44.4676	9.0271
Z003E0133	1.05391	0.658684	0.786027	13.7227	0.0237058	7.0226	1.18405	25.3517	6.33767
Z003E0134	1.02981	2.07705	3.87951	7.16864	0.328626	15.5739	0.87643	31.0307	7.76346
Z003E0135	NA	3.00619	2.62891	19.0208	0.617867	10.8977	7.18115	49.1883	8.08642
Z003E0136	2.59477	2.05337	2.39323	33.3639	1.04051	7.97038	2.9961	53.5085	7.05945
Z003E0137	0.72369	0.935718	3.09241	6.32289	0.313558	13.3901	0.383183	23.743	6.94356
Z003E0138	3.27456	1.87862	2.31899	12.7796	0.286376	7.05863	3.73418	31.2721	6.15882
Z003E0139	2.41877	2.01193	4.36	12.0494	1.75502	15.8482	0.530135	38.6605	6.64136
Z003E0140	1.4381	0.721941	1.55254	18.0536	-0.17123	8.53915	3.27409	35.7516	6.83714
Z003E0142	0.550106	2.09292	4.08427	1.97333	0.65816	15.6852	0.412573	28.2747	8.21337
Z003E0143	1.2473	0.791465	1.21255	14.9696	0.769238	6.09806	1.34533	27.6125	6.4939
Z003E0144	NA	3.02728	3.75906	23.0463	1.32232	12.9229	4.93251	49.6419	9.06862
Z003E0145	2.59835	2.0858	2.92442	25.9454	0.528204	8.16296	NA	46.9895	7.02859
Z003E0147	2.50988	2.98544	3.30363	22.5934	0.961149	10.9967	5.90793	49.7507	7.68514
Z003E0149	1.0965	0.637624	0.881819	21.797	-0.024009	6.21432	0.849396	35.4361	6.71479
Z003E0150	1.49101	3.81786	6.48834	8.55938	0.761616	18.9352	0.958871	43.6258	8.63104
Z003E0152	2.79099	1.17635	1.40783	16.9524	0.656029	6.68999	2.43597	32.9116	6.84617
Z003E0153	2.97934	1.86305	2.08603	17.6001	0.284574	8.67203	5.16694	39.3177	6.3163
Z003E0154	0.791433	1.40259	3.05516	19.8052	2.28683	16.8874	2.43574	48.5454	7.44852
Z003E0155	0.54433	0.442983	0.997553	13.4574	0.504099	4.89521	2.33551	24.2512	6.60788
Z003E0156	2.16821	3.92583	3.5708	11.2931	1.01196	14.9515	1.91868	40.757	8.5712
Z003E0157	2.89356	NA	5.29975	16.0397	1.89155	24.6711	0.746828	53.1229	NA
Z003E0158	0.481827	NA	4.90383	8.99103	0.75149	28.1011	1.18588	51.0043	NA
Z003E0159	3.27852	2.20424	2.51314	25.1752	1.89335	11.4954	4.77783	52.039	8.04668
Z003E0160	0.392234	0.236948	1.99128	21.2409	1.02943	9.5389	3.65726	42.4242	6.58773
Z003E0161	0.607537	2.39405	3.73523	6.26949	0.711367	15.2395	0.330001	29.5941	7.57389
Z003E0163	1.23294	0.976615	1.44396	5.36109	-0.0821647	11.8881	0.719255	24.5954	7.40613
Z003E0164	1.9123	NA	NA	11.291	NA	27.9582	1.18219	67.129	NA
Z003E0165	2.66532	1.81763	2.52875	27.4847	0.669562	12.8213	2.55322	52.2826	7.13322
Z003E0166	2.24183	1.40629	0.997286	8.31223	0.309806	3.29467	1.03695	18.9203	4.57337
Z003E0167	2.69581	1.67075	1.9762	10.7411	0.553959	7.65613	4.64762	32.1708	6.57755
Z003E0168	2.22949	0.715681	1.48749	27.5435	1.21361	7.12558	2.40577	44.5141	7.23502
Z003E0169	1.35422	1.82087	2.56676	5.21693	0.160047	12.4222	0.677806	25.4757	7.27042
Z003E0171	2.72647	1.09834	1.0163	17.5618	-0.123772	7.77919	1.05853	30.5248	6.71142
Z003E0172	0.51453	3.33959	NA	0.226007	0.446069	16.1704	0.22485	26.0076	7.79888
Z003E0173	0.947133	1.24185	1.71334	22.5486	0.292128	9.91167	0.910735	37.74	7.28626
Z003E0174	0.722863	3.50709	7.01803	7.38206	0.0387481	18.3961	0.938037	39.4718	NA
Z003E0175	1.38699	0.380288	1.96685	14.9134	-0.0720215	7.4227	2.02088	30.0782	6.09794
Z003E0176	0.440621	2.03842	3.1355	3.74663	0.262814	16.205	0.405881	26.5622	7.13619
Z003E0177	NA	2.07614	1.87914	24.2024	0.970939	8.81883	1.09324	43.6752	7.57479
Z003E0178	2.13243	NA	5.53977	11.8576	1.32356	23.5314	1.31172	54.0668	9.06565
Z003E0179	1.39147	1.40035	2.70448	3.4774	1.1586	15.0513	0.282898	26.7293	8.54677
Z003E0182	2.60528	1.05689	1.62168	19.6342	0.285283	5.49017	2.29705	34.2564	6.14638
Z003E0183	1.18852	2.60616	3.865	7.65421	0.212924	14.1419	1.30712	32.1572	8.57906
Z003E0184	2.78759	2.69326	2.19476	19.4323	0.819774	6.16309	4.73465	40.7972	6.88478
Z003E0185	0.421751	3.07743	2.90834	6.03705	0.493287	16.1463	0.42419	30.2404	7.24701
Z003E0187	0.577962	2.19484	3.29134	5.54442	0.157572	13.7987	0.562177	27.1064	8.8144
Z003E0189	3.24448	1.38024	2.86595	15.0441	1.23631	9.6175	3.12142	39.1154	6.84151
Z003E0191	1.98158	1.68921	3.5424	20.0551	1.11345	10.1335	4.06674	41.1433	7.07133
Z003E0192	0.923396	4.18385	10.8463	7.8717	0.596585	27.0469	1.44246	51.6658	11.2506
Z003E0193	2.1964	1.29619	0.804061	19.0288	0.38142	6.9548	1.40064	30.6493	6.6954
Z003E0194	NA	2.71083	4.65622	18.5597	1.14664	10.8687	7.99087	49.5034	8.57018
Z003E0196	4.03263	2.04589	3.19447	28.0275	2.13748	8.68701	3.31108	50.5377	7.69027
Z003E0198	1.98521	1.86342	1.90457	14.4452	0.972735	7.00614	5.68053	37.3156	6.55496
Z003E0199	0.281599	1.69565	3.06071	4.68682	0.418713	10.1932	0.530425	21.0076	7.30069
Z003E0212	0.264317	0.510849	1.73252	8.75427	0.0881779	12.106	0.35689	25.6341	6.57506
Z003E0220	2.63802	0.924272	1.37377	13.7375	0.338533	3.99222	1.22743	26.5937	5.22615
Z008E0002	0.750318	2.09733	2.7148	7.76041	0.423279	20.2087	0.526172	34.9554	7.14233
Z008E0003	0.669237	NA	6.94124	3.9267	0.391762	18.3615	0.6226	39.0957	8.09045
Z008E0004	1.40559	1.36697	1.45877	13.5591	0.437041	8.98502	3.3129	31.1132	5.90113
Z008E0006	1.22033	1.00267	2.08096	15.9493	0.558065	9.82146	1.98221	34.6972	5.6499
Z008E0007	1.97299	1.51017	2.69891	20.3579	0.333528	13.2618	4.08155	44.7722	6.65525
Z008E0008	1.03065	3.42599	5.23165	11.2108	0.865048	26.6977	1.81053	48.7284	10.0756
Z008E0009	1.3584	1.18673	1.98957	22.1694	2.09469	16.9073	4.92009	48.8442	7.40599
Z008E0010	1.34538	1.23494	3.17022	9.3939	0.326538	11.6037	1.92088	27.0785	7.40088
Z008E0011	2.28651	NA	4.15463	12.4963	0.342729	16.5253	0.375095	31.9953	6.89721
Z008E0013	0.795525	1.40864	3.39067	15.9167	0.749725	13.5686	3.69813	38.9346	7.35087
Z008E0014	1.38213	1.72668	1.44743	13.295	0.304502	13.5512	1.56408	35.8132	6.40104
Z008E0016	0.498122	0.0743277	1.87608	6.35244	0.302902	7.85685	1.30113	16.2141	5.39724
Z008E0017	0.344827	2.68181	1.83567	6.47004	1.82637	27.3035	0.401706	41.3797	7.90096
Z008E0018	0.290515	0.800306	3.17246	6.94297	2.1138	24.9325	0.532882	38.0644	NA
Z008E0019	1.16609	1.33421	3.01557	18.6906	0.662799	17.872	3.44994	45.754	7.31473
Z008E0020	1.59762	2.06653	2.17652	20.6726	0.339143	12.4919	3.62719	43.1005	6.66299
Z008E0021	0.431171	0.44554	2.59223	9.51541	0.327181	21.4743	0.960202	34.8051	6.07802
Z008E0022	1.64731	2.10815	4.91676	15.8535	0.423902	23.5228	5.48849	53.9175	7.39781
Z008E0023	0.58617	2.30875	8.81574	12.4716	2.42063	27.4624	1.25499	58.633	NA
Z008E0024	0.465859	NA	NA	22.8203	0.914585	25.1524	NA	72.0819	7.82159
Z008E0025	0.874347	1.17411	4.23506	5.31416	1.36794	26.6299	0.401417	39.6763	9.68819
Z008E0026	0.457665	2.07889	3.16043	4.74449	0.367927	31.5681	0.570683	42.4228	8.8165
Z008E0028	1.88705	0.881634	2.06613	25.2483	1.19475	10.9915	7.5336	51.0598	8.90089
Z008E0029	0.725641	3.5531	2.18075	5.03201	0.249644	14.2111	0.500063	24.4942	7.18625
Z008E0030	0.955007	2.41073	5.0815	8.42647	0.779532	27.132	1.02455	46.4345	8.63562
Z008E0031	1.5008	0.826164	3.05948	11.2682	0.296026	13.5813	2.04003	32.4364	6.40106
Z008E0032	1.66371	2.12473	1.30567	8.52154	0.318278	5.87756	0.734462	17.3661	4.41415
Z008E0033	0.933493	3.2256	6.61173	4.65154	1.01067	18.8303	0.766027	34.9391	7.64012
Z008E0034	2.01364	1.26273	3.08601	13.293	0.470728	10.813	2.59947	25.4508	6.4075
Z008E0035	1.47273	0.984524	2.82535	12.6398	1.2036	16.8653	7.7385	53.3726	8.40348
Z008E0037	1.25758	3.23825	6.52036	18.8371	0.486694	28.9738	3.97694	65.1301	7.85045
Z008E0038	NA	2.15188	1.57283	16.2436	2.765	8.86436	7.38604	47.1985	7.8954
Z008E0039	0.934872	2.23061	6.43513	5.91311	0.535316	25.7162	0.649207	44.9705	9.1592
Z008E0040	1.22742	2.83954	5.81124	5.7382	0.559693	24.6237	0.691557	43.9275	7.80324
Z008E0041	1.13053	2.04531	4.21883	9.95775	2.64373	30.5054	3.39154	58.6069	9.8469
Z008E0042	0.261863	1.11097	3.55153	9.96089	0.372255	19.1861	0.471212	35.8871	7.40703
Z008E0043	1.09028	1.78612	2.74359	13.6204	0.506626	13.2294	2.93665	36.8146	6.90099
Z008E0044	NA	2.47915	2.59485	17.311	0.600423	8.23896	5.85361	40.7053	8.4012
Z008E0045	1.09032	0.893204	3.10449	27.1721	0.317284	14.666	5.49394	51.8809	6.30128
Z008E0046	0.483375	NA	4.33936	10.4426	0.271042	30.0488	0.970033	51.2187	8.91232
Z008E0048	0.7542	1.68822	3.54978	12.9953	0.67554	13.6157	3.04123	40.4377	7.37275
Z008E0050	0.738696	3.55776	10.4407	7.81548	0.569716	21.5155	0.621318	41.3987	7.53755
Z008E0051	1.54393	4.03504	3.96543	18.0913	0.503763	19.6987	4.68362	54.2555	8.28262
Z008E0053	0.583231	1.85262	2.82614	2.47517	0.643612	19.656	0.335744	29.4459	8.07572
Z008E0054	0.998985	1.82274	6.77752	13.176	1.49312	36.0058	1.53316	60.3524	NA
Z008E0056	0.43303	1.806	3.64913	4.32079	0.809518	38.9246	0.499327	53.8035	9.84238
Z008E0057	NA	2.73752	4.59901	20.6308	2.73247	20.9062	10.79	60.8081	8.40737
Z008E0058	1.19561	0.509647	2.93482	22.6673	0.665869	12.1212	5.99773	46.3431	8.40316
Z008E0059	0.759636	1.33103	5.8807	19.5524	0.433099	11.0727	6.14013	48.0465	7.08875
Z008E0060	0.598675	2.90883	NA	5.01152	0.947781	18.6525	1.43847	38.2016	6.81923
Z008E0062	0.758245	2.91018	4.52505	9.96064	0.478737	17.6977	1.2955	39.4971	8.10097
Z008E0066	1.525	1.87376	4.75048	17.3602	0.634074	20.7807	4.34131	51.4816	6.85353
Z008E0068	1.33809	0.727614	0.737459	17.2555	0.258923	8.3455	3.50411	33.8647	7.83048
Z008E0069	0.832297	2.5482	2.70594	24.9844	1.05826	16.7862	6.63472	56.9132	7.54841
Z008E0070	0.623301	NA	7.43806	5.46856	0.649325	46.2011	1.01419	67.5631	9.87194
Z008E0071	1.16799	0.81443	1.40756	10.6256	0.459835	4.612	2.53519	21.5808	5.1068
Z008E0072	0.822192	3.24627	4.53534	9.46965	0.44498	12.8814	1.33605	32.441	7.36105
Z008E0073	NA	1.46863	1.71614	23.4137	1.18132	11.785	5.62432	48.5035	5.90727
Z008E0077	0.572171	4.07825	4.14464	5.41849	0.259654	22.7376	0.635747	39.1411	8.22024
Z008E0079	2.41321	1.68874	8.32727	19.1984	1.44297	17.7755	7.17429	57.4139	8.09443
Z008E0082	0.645506	1.69484	5.26197	3.97375	0.538354	14.7891	0.324183	29.163	7.08705
Z008E0083	0.6631	2.61135	6.68853	5.48351	0.512884	15.3298	0.67062	31.1647	7.63938
Z008E0085	0.829545	0.83026	1.83254	13.6293	0.282928	8.43484	2.2364	29.3179	5.63298
Z008E0086	0.648391	3.1321	2.99055	10.6612	0.310571	16.159	0.791828	33.9204	6.89442
Z008E0087	1.32026	0.871567	2.37983	12.1406	0.27038	8.71691	2.31528	29.8085	5.40092
Z008E0088	0.425925	1.72823	8.21824	5.15404	1.02369	21.4812	0.72139	42.5768	7.35325
Z008E0090	1.67765	1.64214	2.0183	14.0815	0.78131	13.2902	3.03589	39.2513	6.4222
Z008E0091	1.19342	2.38236	3.79409	26.2581	0.47652	17.8736	8.90112	63.4186	7.63836
Z008E0092	0.551595	1.83217	2.924	9.84782	0.466526	16.343	0.490043	29.5647	6.90103
Z008E0094	2.10117	1.54866	2.43742	23.6442	0.968457	13.2398	6.41716	52.1585	8.3995
Z008E0097	0.245241	1.94341	5.99866	13.9704	1.8826	43.316	1.27473	68.3539	NA
Z008E0098	0.494491	2.69821	5.58546	5.0816	0.788313	25.8255	0.836929	42.5045	9.81324
Z008E0101	0.0309792	0.309206	6.93882	11.8784	0.29706	46.0656	0.375665	66.3975	8.89204
Z008E0102	2.23985	2.3624	6.92048	22.6901	0.81003	19.5055	4.44742	60.2522	6.62456
Z008E0103	0.0981546	NA	7.67841	3.0469	0.817835	18.1894	-0.0167368	37.2079	7.40102
Z008E0105	NA	1.6411	1.67618	21.2687	2.4389	13	3.50709	46.2535	8.39458
Z008E0106	1.51627	1.1363	2.73964	13.5887	0.252401	8.71991	2.56722	30.2202	6.09675
Z008E0107	1.00613	2.49195	7.93175	11.2035	0.333283	23.8813	1.5084	44.4787	NA
Z008E0110	NA	1.51401	2.46555	28.2565	1.69085	9.68777	7.45611	56.203	8.40762
Z008E0112	2.15171	2.77374	4.68853	19.4138	0.884199	19.1834	NA	53.3956	7.8428
Z008E0113	0.723236	0.242438	0.497625	13.0867	0.317149	6.86703	1.05337	21.5759	5.06261
Z008E0115	2.6762	1.97281	1.81068	26.3993	0.539224	14.8978	10.6589	60.3288	8.09777
Z008E0118	0.390559	2.75835	7.45724	14.6383	0.441061	33.8083	1.92898	61.5436	10.0851
Z008E0119	1.34107	2.68035	3.27512	16.854	0.329336	12.5183	2.09911	38.2844	7.06904
Z008E0120	0.85087	1.33026	2.06834	38.4685	0.496862	22.9087	4.93331	71.4366	7.12021
Z008E0121	2.77376	1.60696	2.08272	28.68	2.05243	10.3179	5.69779	52.4132	8.09299
Z008E0122	1.19042	1.30537	3.69139	24.6451	0.941756	12.8298	7.63135	53.1481	7.52596
Z008E0125	1.13126	2.14068	3.22159	14.9011	0.319108	16.3446	4.04233	42.0283	6.40982
Z008E0126	0.405292	1.79678	5.08274	3.58569	1.36214	23.2529	0.464409	37.1095	8.84455
Z008E0128	NA	1.31036	1.39226	16.7108	1.52877	10.9808	9.85653	45.7912	8.39923
Z008E0129	0.918837	4.1556	4.03637	12.766	0.263554	35.0047	0.94344	60.0081	NA
Z008E0131	0.238298	4.2229	9.22091	4.62024	0.353019	22.4979	0.599753	50.7324	8.89941
Z008E0132	0.749229	4.77822	3.99593	14.3896	0.427368	28.6623	1.50684	54.3529	8.89762
Z008E0135	2.5035	1.67662	2.94265	25.605	0.508379	16.3265	NA	56.3396	7.31076
Z008E0136	0.475155	4.21901	4.96654	8.5352	0.524208	38.6758	1.08473	63.7084	9.83028
Z008E0137	1.13631	1.31843	3.24107	10.8584	1.51528	21.5937	3.36976	43.3805	7.77444
Z008E0139	2.0062	1.80803	2.43762	18.9967	1.21441	13.032	4.02864	43.3601	6.09296
Z008E0140	1.18821	2.46002	2.49654	9.36435	0.300212	14.1753	0.778453	28.2488	7.40963
Z008E0141	0.331263	NA	NA	7.60401	0.779352	33.6925	0.536178	60.8773	NA
Z008E0142	NA	2.79889	2.77015	22.268	1.2284	17.3213	6.63912	55.7369	6.90111
Z008E0143	0.599282	1.56299	6.19878	7.58273	0.603257	30.9112	0.505206	48.4619	7.79602
Z008E0144	NA	2.44833	2.66082	15.1494	0.327489	18.0003	2.11561	40.5226	6.39755
Z008E0145	1.28323	1.90686	1.10678	23.5666	0.406721	9.20002	4.12543	42.7762	6.39746
Z008E0146	0.673389	3.51205	3.63656	8.59787	0.822989	24.0931	1.53841	41.091	8.8227
Z008E0147	1.79155	1.67168	3.70936	18.1266	0.363889	15.7818	5.68273	47.4444	7.90327
Z008E0150	0.815985	2.17301	3.44864	5.02617	0.598485	14.4174	0.419597	28.5611	6.18372
Z008E0153	1.94775	1.9988	3.18759	26.2439	0.580852	16.5848	NA	59.9143	6.80133
Z008E0154	0.303816	1.19663	2.78527	3.219	0.516927	14.7125	0.253948	22.4336	6.62541
Z008E0155	0.599168	4.06537	4.33333	4.91014	0.353572	19.0875	0.697879	33.5771	7.14007
Z008E0159	0.864809	1.18989	1.77057	12.6959	0.338888	12.1139	1.80179	29.3203	6.84591
Z008E0160	0.836661	1.65126	0.568173	15.506	0.579325	4.84162	1.53039	26.8903	4.63056
Z008E0162	0.357145	2.06588	1.3404	3.85365	0.741433	14.8047	0.176944	20.4791	5.86138
Z008E0165	0.7368	2.39756	5.22335	4.43925	1.36266	27.479	0.855875	42.076	7.85017
Z008E0167	2.02783	1.96461	2.24982	15.7821	0.497593	10.598	3.40084	36.1195	6.64452
Z008E0168	0.660339	3.41253	5.04443	3.03614	0.55253	30.9604	0.320899	44.7679	9.25685
Z008E0170	2.07688	1.12198	2.33582	14.0135	2.19502	7.22655	3.33604	28.2112	6.39969
Z008E0171	0.535524	1.834	2.51439	6.7153	0.390458	12.338	0.649462	25.2843	5.67437
Z008E0173	1.12471	1.73727	1.65711	20.3306	0.358728	14.0407	2.52459	43.1906	NA
Z008E0175	2.48793	2.80024	5.76488	16.0411	0.573931	21.4933	4.34006	53.3508	8.39581
Z008E0177	0.149702	2.49482	4.5457	6.67964	0.294088	24.4248	0.506404	46.5887	NA
Z008E0178	1.82304	1.24653	1.36251	13.2676	0.272609	6.07569	2.10954	25.7157	6.21723
Z008E0180	0.475446	3.26482	4.51613	7.23062	0.523703	23.1452	0.684637	38.1702	9.41276
Z008E0181	0.567011	NA	4.19165	7.46678	1.3113	24.5428	0.841982	47.159	7.80437
Z008E0182	0.595197	3.81819	3.10579	4.81533	0.379839	18.8056	0.268679	29.7296	6.66989
Z008E0183	1.52809	2.402	2.96311	22.2029	0.437052	14.3316	4.79575	51.1111	7.34671
Z008E0185	NA	3.59522	3.34057	19.4051	1.14239	18.6875	5.54695	56.2638	8.39784
Z008E0188	0.513748	3.30907	5.76657	5.08867	0.3573	27.3849	0.650614	43.155	7.57351
Z008E0189	1.46777	1.01144	0.487035	13.2605	0.421122	8.15566	1.06213	26.5301	5.4101
Z008E0191	1.48933	1.22479	1.97586	12.1692	0.641946	11.2932	1.70414	30.7936	5.08684
Z008E0194	0.990446	3.72972	7.46491	5.37424	0.949735	29.7491	0.699964	48.6407	8.7869
Z008E0195	0.494406	1.94967	3.48788	6.678	0.604057	18.4273	0.516326	32.7137	8.07994
Z008E0197	0.717675	1.04693	3.37313	17.0566	0.542371	15.4003	4.25307	43.0192	6.90099
Z008E0199	0.472619	2.45524	1.84887	8.25498	2.41655	27.0402	0.484539	45.2325	NA
Z008E0200	1.18358	1.21347	3.78882	16.2716	0.359093	14.9453	1.96624	41.8284	6.84603
Z008E0253	1.04739	2.0729	2.38069	16.0754	0.469908	21.5853	3.53421	47.7346	8.12752
Z010E0001	0.886254	1.64774	4.17509	11.4488	-0.130103	12.583	1.49831	32.5672	6.7323
Z010E0002	-0.140463	0.907543	6.33311	7.77601	0.870439	17.4663	0.206166	32.76	7.12622
Z010E0003	-0.112015	0.638329	6.01095	5.20521	-0.0482557	16.2159	0.109716	23.542	6.7986
Z010E0004	0.055428	1.50544	9.80752	6.45257	1.83204	20.7482	-0.159456	41.6546	8.35096
Z010E0006	0.120146	2.90912	5.29976	4.64896	-0.104834	17.5043	-0.0885079	30.1484	7.11957
Z010E0007	0.853498	0.849723	2.68319	16.1158	0.378891	8.63444	3.12919	37.7917	6.93182
Z010E0008	0.447554	0.150846	4.22437	10.999	0.100823	33.0429	0.172654	47.322	7.71018
Z010E0009	-0.160361	1.2907	3.74217	2.97875	-0.0802276	16.9566	-0.688949	24.0354	7.38211
Z010E0010	3.34033	1.57613	1.29459	26.07	1.22129	10.7692	6.2547	54.6148	6.60381
Z010E0011	0.713871	0.87146	3.92624	21.1794	0.958514	19.6186	2.45606	49.6637	6.7304
Z010E0012	0.247591	-0.0291135	4.19764	18.7096	0.782132	14.3162	1.11624	37.9564	7.13223
Z010E0013	0.0536756	3.5194	NA	0.582878	-0.381234	28.468	-0.432628	43.6273	8.11743
Z010E0014	-0.118139	2.68593	9.50137	5.69151	0.245018	26.5891	0.0798069	43.205	NA
Z010E0015	-0.115538	1.71865	4.26079	3.0436	0.0318028	17.9719	-0.324548	26.4005	7.60171
Z010E0016	0.257401	0.883653	3.05288	12.2238	0.00799277	11.7449	1.40497	29.7544	5.38394
Z010E0017	0.192326	3.44781	7.73122	7.72387	1.7523	15.7066	0.569561	40.1783	7.7888
Z010E0018	NA	2.09931	5.31729	25.4423	0.859736	15.9828	3.59238	58.9321	6.20744
Z010E0019	0.392654	3.85302	NA	7.40831	1.97483	20.5727	1.67834	50.1488	8.51593
Z010E0020	0.532703	0.388825	1.79189	14.5766	0.00892909	9.96245	0.0930701	27.1376	5.85846
Z010E0021	-0.231161	3.23625	5.21181	2.44496	0.161248	19.6315	-0.18908	31.8744	7.71122
Z010E0022	3.51007	2.01517	2.5824	24.8774	0.417688	14.1327	4.21199	48.5039	7.71571
Z010E0023	0.6125	2.36595	5.97998	6.14087	-0.0412714	22.6887	0.0518488	34.8142	7.75345
Z010E0024	0.340303	0.912091	3.4343	4.99393	0.142603	24.1759	-0.162409	33.0418	7.80137
Z010E0025	0.0692844	3.04859	4.66024	5.13366	-0.0440021	29.7585	0.622799	44.7385	8.06714
Z010E0026	0.132889	1.54034	7.09422	7.519	-0.0340786	21.7122	0.664357	41.8689	7.89563
Z010E0027	0.628197	1.40032	7.47091	13.7148	0.663259	15.8678	5.36025	42.3819	7.83855
Z010E0028	0.481122	0.363527	3.33803	13.1403	0.101719	12.7831	2.61497	33.3328	6.58458
Z010E0029	0.282795	1.84239	7.65841	5.17485	-0.0218447	18.0274	0.00443132	31.4185	6.44343
Z010E0031	0.395702	1.33539	4.52269	16.8351	0.51557	17.1481	-0.188675	40.1022	6.0546
Z010E0032	-0.111443	0.509535	5.1247	14.5637	0.946292	23.3076	0.283814	48.4864	7.40233
Z010E0033	0.00799446	0.429973	5.75529	16.016	0.403348	14.8919	0.4691	34.2583	6.17766
Z010E0034	0.466776	1.2618	6.37856	22.3738	1.59939	13.9299	2.06745	47.5134	7.36232
Z010E0035	0.0625618	1.29187	7.67916	6.8695	1.45961	21.7308	0.140214	40.6865	7.57191
Z010E0036	0.934285	2.23197	8.12881	26.8648	1.95303	19.3361	3.01206	59.8395	7.97141
Z010E0037	0.170564	0.961146	3.08851	4.35014	-0.0301797	18.7171	0.171279	25.5567	6.73865
Z010E0038	0.133249	1.79574	5.79201	3.39391	1.11578	21.9383	0.0502212	35.0641	7.39436
Z010E0039	0.0241169	1.91417	6.26175	9.68478	0.71905	19.4653	2.6273	38.8226	7.13082
Z010E0040	0.223732	0.0527392	2.87253	18.2705	0.606918	13.4856	0.4766	34.5285	5.5777
Z010E0041	0.237909	1.20549	5.76398	3.79097	0.348369	26.3399	-0.15158	37.4821	8.01081
Z010E0042	-0.228589	0.987774	7.48727	8.48205	0.205554	17.2423	0.0913375	34.0195	7.13646
Z010E0043	0.138091	1.09179	3.55539	2.76332	0.257574	20.2621	-0.314835	30.1802	6.85334
Z010E0044	0.364052	1.44875	5.13539	4.63081	0.235435	22.5487	0.392778	37.8475	7.96183
Z010E0045	0.162463	2.57523	2.73493	16.0926	-0.137437	23.7189	2.68092	51.4331	7.98383
Z010E0046	-0.0428622	4.24939	8.93266	4.22499	0.730683	29.6055	0.117596	49.2839	8.33657
Z010E0047	0.639001	0.328292	1.88867	19.1678	0.222301	7.51581	1.01235	30.9519	6.63183
Z010E0048	-0.0858535	1.10757	2.55793	13.7947	-0.0897795	10.6658	0.914041	32.0083	6.10023
Z010E0049	1.44561	1.4098	2.10689	17.6133	0.952749	19.4639	0.64973	43.3946	6.20709
Z010E0050	3.24127	0.712111	2.43001	27.3599	0.262898	12.3591	1.48748	49.9284	7.42244
Z010E0051	0.277181	1.89541	5.26598	4.23969	0.744686	28.4349	-0.0327226	40.6687	8.07482
Z010E0052	0.799841	0.291485	1.13774	14.8756	-0.0405332	10.8466	0.0677802	25.9421	6.37104
Z010E0053	1.7691	4.52807	NA	11.0375	1.64225	17.3156	0.993151	47.866	7.34887
Z010E0055	1.59355	2.38339	2.83046	11.4767	0.149103	11.2206	1.53647	34.5064	6.21073
Z010E0056	-0.229321	NA	11.2663	10.388	1.1776	22.9222	0.464583	48.0727	8.21256
Z010E0057	-0.261208	1.1021	5.99946	3.94352	1.40895	23.4756	-0.248467	31.849	7.12547
Z010E0058	-0.138766	2.43244	7.98076	6.28786	0.478559	27.7489	0.48888	45.6055	8.30729
Z010E0059	-0.0292801	3.57896	NA	5.68199	0.514572	27.2891	0.541031	49.1891	8.5391
Z010E0060	0.784098	0.16757	2.11883	16.6822	0.00697452	13.594	0.336081	31.8242	6.85853
Z010E0061	0.905479	0.0848043	2.41431	28.801	1.26326	12.8415	1.42705	47.4844	6.72244
Z010E0062	0.236873	1.07895	7.24041	26.2891	1.93032	15.7837	3.36394	56.4242	7.5268
Z010E0063	0.147946	3.86158	5.29434	8.85464	0.880429	18.8659	0.409795	39.1292	8.20999
Z010E0064	0.228905	3.0374	NA	3.18026	-0.336593	29.0624	-0.340274	37.7671	8.23356
Z010E0065	0.591997	0.772481	1.77644	24.0337	-0.153073	9.29363	3.40518	40.0222	5.51528
Z010E0066	0.262968	1.40515	5.88222	4.07197	-0.1511	23.1013	-0.0159732	34.7682	7.10809
Z010E0067	0.145745	0.177039	3.16177	20.7189	0.0991878	15.9717	1.26966	42.867	7.21956
Z010E0068	0.0528371	NA	7.4351	15.1894	2.27516	24.1567	0.322344	50.9984	NA
Z010E0069	-0.0129444	3.37291	8.57427	6.89922	0.411692	26.9823	0.251122	46.2303	8.16452
Z010E0070	-0.0220424	0.744465	4.94089	5.7124	0.0384387	30.4351	0.106577	38.9619	6.63307
Z010E0071	0.740103	2.10136	8.82978	12.5341	1.02331	34.5245	1.17914	59.0474	8.20678
Z010E0072	1.07078	3.79878	6.44449	8.32352	3.08101	39.4512	0.437276	62.9256	6.62508
Z010E0073	0.462096	0.76067	3.10313	9.36615	-0.126174	15.4483	1.24208	32.1762	5.30237
Z010E0074	NA	2.84566	7.8978	35.9522	2.68662	24.2388	6.3131	82.9186	NA
Z010E0075	0.870671	0.937147	4.1486	16.1799	0.220472	13.398	4.59565	40.1665	6.21176
Z010E0076	0.167233	0.397082	2.32616	10.8289	0.866473	18.6429	2.05128	36.896	6.83256
Z010E0077	0.690753	0.868258	3.50918	17.9825	0.0197285	8.67561	1.0663	30.1159	6.30379
Z010E0078	-0.299348	2.25076	7.51598	3.67745	0.574465	25.2745	0.185703	40.0139	NA
Z010E0079	0.128257	1.42046	5.57212	7.34437	0.252282	28.4721	0.670263	45.0394	7.54737
Z010E0080	0.0654036	1.45159	6.61932	5.54418	-0.00354328	25.2076	-0.253541	37.1058	7.17474
Z010E0081	1.19189	1.31694	5.31842	14.6832	0.403156	15.6014	1.12576	40.0764	7.51583
Z010E0082	0.580838	1.60955	7.78562	11.9489	0.467222	11.5197	3.31359	33.8587	7.12466
Z010E0083	0.40641	0.118875	4.01058	3.32372	-0.251116	23.9116	-0.376518	30.5977	7.13078
Z010E0084	0.304914	-0.0318616	4.44211	6.67687	0.974181	19.982	0.000583602	29.6615	7.49961
Z010E0085	-0.0250247	3.15973	7.11573	8.29301	0.224955	22.0581	1.47607	42.4099	8.4842
Z010E0086	0.34851	0.925515	5.33145	7.58798	0.52525	16.1457	1.80383	29.4912	7.41542
Z010E0087	1.15447	0.928041	2.36195	17.0725	0.172323	9.63426	5.10711	36.4682	6.22262
Z010E0088	-0.0886686	0.930512	5.47164	2.59578	-0.0996797	14.2076	0.0415384	22.9936	6.80216
Z010E0089	-0.0821203	1.66658	6.73228	6.54116	0.156908	33.0975	0.653918	49.5057	7.56938
Z010E0090	-0.146974	3.81338	NA	4.52344	0.877845	30.152	0.0359328	53.7761	8.30332
Z010E0091	1.12966	0.421419	6.00055	21.3345	0.997927	12.1882	2.48799	44.4968	7.54859
Z010E0092	0.694577	1.11419	2.01787	14.1297	0.686069	12.2755	2.24674	37.4714	7.20467
Z010E0093	0.0701991	1.10363	3.6338	4.14399	0.401017	34.2006	-0.321815	39.722	8.59635
Z010E0094	0.531931	0.633833	3.11712	20.6591	0.0241752	15.496	0.510036	38.2501	7.11897
Z010E0095	0.20039	3.55281	9.39618	4.18624	1.83107	16.6182	0.219916	35.7518	NA
Z010E0096	0.375479	0.548386	1.25641	21.7405	0.14305	10.7365	0.465268	32.0833	5.58712
Z010E0097	0.906607	1.65054	2.01866	20.4308	0.108757	13.0211	0.0613096	35.4639	6.21021
Z010E0098	0.27507	2.9605	5.15342	7.28821	1.93005	36.8071	0.570271	56.1391	8.13031
Z010E0099	0.790216	1.43945	4.55666	22.0408	0.0207614	18.5243	1.20824	49.9546	8.55046
Z010E0100	1.26216	0.928095	4.92934	28.0206	0.293431	19.534	1.88184	55.1181	7.41021
Z010E0101	0.519596	1.64543	5.38864	3.46996	-0.12622	24.7635	-0.0171983	33.8315	8.22821
Z010E0102	-0.101913	-0.0595719	4.22951	17.0057	0.197821	12.5748	0.552689	30.41	6.81407
Z010E0103	0.205515	2.09018	8.0914	4.75471	0.889792	31.9042	-0.0116079	49.4039	8.38664
Z010E0104	0.588481	2.64809	8.08548	9.43591	0.806973	24.2834	1.00542	48.6104	8.08592
Z010E0106	0.347828	0.681498	1.68045	10.163	0.528561	16.4788	0.681122	28.106	7.05316
Z010E0107	0.747259	0.301154	1.93343	11.1845	0.595065	11.9325	1.04933	28.4171	5.2051
Z010E0108	1.72314	1.89947	3.63846	17.21	0.824378	15.5202	2.27783	43.4855	7.38033
Z010E0109	0.341286	-0.118343	3.26735	15.2453	0.338635	14.3287	5.36797	35.0933	7.14784
Z010E0110	0.50617	0.647464	3.11803	19.3819	0.978922	16.8924	0.855394	37.9273	7.49285
Z010E0111	-0.325912	2.41159	7.56636	5.82142	1.47085	41.3056	0.514263	58.1774	8.09306
Z010E0112	1.54184	0.623946	2.23894	17.856	0.0184203	10.8076	0.618319	31.746	5.13092
Z010E0113	0.0498017	2.24854	5.09751	5.87392	1.20798	34.7117	0.00610261	52.0864	8.14987
Z010E0114	-0.0702661	0.997079	6.76072	2.92098	0.2477	19.7991	-0.0173259	29.4099	5.05667
Z010E0115	0.0976135	-0.219784	2.28131	18.5835	1.41502	7.98325	4.26739	35.4331	5.35847
Z010E0116	-0.0147429	0.599463	3.21727	2.95651	-0.0162476	16.0725	-0.172855	21.6205	6.76423
Z010E0117	0.00263759	0.0364604	3.24663	10.9225	0.0908845	19.316	1.19696	33.9833	8.20628
Z010E0118	1.84322	2.37849	3.94842	20.2088	0.614703	17.5166	0.648965	47.7977	7.18037
Z010E0119	1.8833	0.986416	2.85218	19.4577	0.408973	10.8027	1.23556	36.29	5.68354
Z010E0121	0.469301	2.92334	6.10904	4.58412	0.202826	30.6376	-0.14332	45.2853	8.20399
Z010E0122	-0.00400131	2.12784	6.5591	3.36761	0.36637	22.4618	-0.0325152	35.2447	8.54894
Z010E0123	1.28226	1.83205	3.64647	23.8073	2.15757	12.1142	2.51289	49.2265	6.76014
Z010E0124	0.0594454	0.93263	1.91297	18.2755	-0.172786	17.8674	0.900601	38.7971	7.13124
Z010E0125	-0.036792	3.67079	5.67367	10.8112	0.168148	27.1439	1.37193	50.3112	7.79823
Z010E0126	0.196496	1.03614	3.31071	3.37037	-0.0700473	18.7524	-0.108268	27.9127	5.96566
Z010E0127	0.618583	0.975481	4.94697	17.3869	1.86588	15.3741	12.4188	53.1526	7.17658
Z010E0128	0.322886	2.15114	4.6361	25.2806	0.42715	16.1622	2.4849	47.566	7.47212
Z010E0129	0.646942	1.25378	3.40242	5.17797	0.00387387	14.7636	0.095062	24.5497	7.14025
Z010E0130	-0.0143363	0.835174	5.41725	4.00446	-0.242056	30.2421	-0.0120099	40.9815	7.9532
Z010E0131	0.726672	3.63713	4.0573	13.1737	1.68457	31.6642	2.74005	59.4934	8.59144
Z010E0132	0.390501	0.62539	3.08936	19.0583	0.10182	14.7693	0.858075	38.0874	6.7545
Z010E0133	0.431189	0.978045	7.79261	9.33965	1.03235	19.8961	0.718207	39.2784	8.11813
Z010E0134	0.507828	0.677515	4.61779	17.6263	1.26777	15.1155	12.2933	51.9589	7.18112
Z010E0135	0.468908	NA	8.88314	17.3103	0.942692	39.5845	1.47415	70.6484	8.70949
Z010E0136	0.93398	1.83289	5.12458	7.21968	0.212398	20.384	0.471782	36.8993	NA
Z010E0137	-0.183612	1.75889	4.36704	5.9326	0.471467	18.9948	-0.212524	30.3804	7.53718
Z010E0138	0.231741	0.175704	3.01144	23.352	0.317574	10.4345	1.62086	38.6854	5.55786
Z010E0139	0.0674198	1.56064	4.09988	4.30004	-0.0638378	14.8264	0.0490902	22.7633	6.46623
Z010E0140	0.282164	NA	8.43972	6.23527	1.67163	22.8387	0.365474	40.3555	8.21093
Z010E0142	0.851401	1.36668	5.63774	22.9678	1.76248	19.3775	2.32107	51.9176	8.21235
Z010E0143	0.414347	1.335	5.37106	15.2003	0.349018	13.2809	0.8437	32.608	5.11732
Z010E0144	0.157131	2.31286	5.86728	6.00808	0.087687	17.614	1.08767	34.0585	7.30456
Z010E0145	0.000965314	1.11739	7.60664	2.87184	0.478086	25.546	-0.354559	36.6615	7.50173
Z010E0147	1.28271	1.02677	3.97793	21.4408	0.594775	15.1512	2.59271	45.116	6.74017
Z010E0149	1.21196	1.9863	4.81548	11.9117	0.814666	14.6526	4.31159	41.1339	6.90631
Z010E0150	3.74506	2.02189	4.82297	24.1	0.543826	17.5698	3.2948	55.666	7.56696
Z010E0151	0.706983	1.85659	4.23947	6.73367	-0.106465	18.402	0.490194	29.2606	6.1434
Z010E0152	-0.25952	2.21397	6.7776	8.64957	1.85609	38.7894	-0.0327311	57.8053	8.08058
Z010E0153	0.986953	0.459257	2.33142	16.8173	0.822264	12.3802	1.03154	38.7284	5.18687
Z010E0155	1.64577	2.07579	6.54711	17.482	0.342833	15.9573	4.34128	49.2566	7.36121
Z010E0156	0.223434	0.185749	2.21797	18.6208	0.0894924	17.6673	0.551862	39.5331	7.20879
Z010E0157	0.850334	0.862012	3.13864	15.1623	-0.235478	12.6537	2.86431	32.2275	6.0306
Z010E0158	0.691988	NA	NA	6.28608	1.26913	19.6219	0.744476	42.8434	7.70442
Z010E0159	1.1544	0.793526	4.6035	15.6216	0.292583	12.9879	3.6503	37.0406	6.20893
Z010E0160	-0.108124	1.33384	7.68588	3.69772	2.81045	29.9645	0.0504806	40.7329	8.5042
Z010E0161	0.144166	2.45594	10.1758	3.28026	-0.209479	19.7574	0.00190565	32.8347	7.97745
Z010E0162	-0.0622746	1.51551	5.32782	8.92315	0.114601	19.2767	0.279001	34.4514	7.71617
Z010E0163	1.82629	1.23935	3.4428	26.7055	0.187219	20.6243	0.812204	55.2649	7.09311
Z010E0164	0.302731	4.95613	6.60056	12.7225	0.733595	28.6431	0.445254	53.8502	7.96847
Z010E0165	-0.0403796	0.311615	3.29192	16.6612	1.42763	7.26803	1.83093	30.0851	5.27688
Z010E0166	NA	1.33863	5.28441	23.4918	0.525098	15.4857	1.62332	51.3521	7.21574
Z010E0167	0.0634282	1.32142	5.14905	13.0956	0.147943	9.78098	3.78971	34.0181	5.15434
Z010E0169	0.782957	2.03407	6.30216	12.698	1.44609	25.4658	0.911625	44.8202	8.10264
Z010E0170	1.52951	0.208377	0.839912	24.4147	0.0575648	13.8734	0.439016	40.4254	6.73057
Z010E0172	0.161485	1.67515	6.88178	6.01381	-0.068948	31.5757	-0.196735	44.4366	7.78678
Z010E0173	0.163297	-0.0645958	3.7884	17.6248	0.00846708	17.8578	1.05502	42.9475	6.07119
Z010E0174	1.61321	1.89417	8.38699	18.3939	1.47168	21.9649	3.00948	53.4579	NA
Z010E0175	1.77613	0.0446683	1.57291	21.744	NA	10.9486	1.38654	42.9369	7.19761
Z010E0176	0.0523258	1.3693	4.90394	10.5595	0.996605	32.0059	0.425749	46.6719	8.21404
Z010E0178	0.3254	1.1804	4.83287	9.69572	0.445281	25.7423	0.262442	42.4172	7.34623
Z010E0179	0.290592	0.172339	3.61962	12.8426	-0.212167	14.7407	1.38234	27.0408	5.11643
Z010E0180	0.414516	NA	8.54976	6.35748	0.136456	17.733	0.350593	32.0572	7.72639
Z010E0181	0.85481	0.51856	2.75759	20.8107	0.05497	12.0162	0.78358	38.2657	6.77664
Z010E0182	0.128981	2.11803	NA	7.43284	2.53363	37.2419	1.91621	67.0606	8.104
Z010E0184	-0.149069	2.38357	3.85969	4.00645	0.318442	18.2704	-0.182616	28.0311	7.72316
Z010E0185	0.452188	0.848821	2.71182	14.6441	0.980042	10.3365	1.67069	30.9546	5.21096
Z010E0186	-0.153858	0.18938	3.8588	11.1164	0.557085	10.408	0.696772	21.8438	5.1362
Z010E0187	0.478199	2.16491	7.87271	8.67977	1.17073	22.9089	0.763971	46.7987	8.70215
Z010E0188	-0.122945	2.22514	5.74072	21.668	2.18322	21.4604	NA	61.7826	7.14188
Z010E0189	0.116208	1.80609	4.53439	24.3007	0.347797	18.3985	1.19115	49.5694	5.71373
Z010E0190	0.233003	NA	NA	10.4976	1.97275	NA	0.449331	82.5825	8.14885
Z010E0191	0.236447	0.234277	4.2975	17.0395	1.04848	12.3	1.27393	34.781	7.15978
Z010E0192	2.00865	1.09073	5.2286	13.1185	0.100046	18.8964	1.53183	40.8776	6.22148
Z010E0193	0.0789294	0.531905	2.43389	15.8685	0.185031	7.71325	1.4688	27.4937	5.46807
Z010E0194	0.108108	2.50433	7.67591	3.93888	0.0139118	25.4762	-0.126854	37.4067	8.44263
Z010E0195	0.353195	0.707457	6.31466	4.74309	-0.0912932	24.5816	-0.0698341	33.1398	7.79754
Z010E0196	0.378492	0.976957	5.09521	12.7755	-0.0540577	25.9675	0.218604	47.2754	8.44271
Z010E0197	1.65937	0.937749	3.57212	20.835	0.340114	12.6778	3.48023	43.7661	7.18197
Z010E0198	0.0625658	2.77387	8.95804	4.60089	1.10247	19.1474	0.204837	36.7944	8.41331
Z010E0200	1.94513	0.434383	1.79602	18.081	0.626586	8.96871	0.578076	30.0256	5.14647
Z010E0214	0.375697	0.305015	5.39018	23.1412	1.26696	15.9418	2.38902	49.8279	7.56828
Z012E0001	1.98315	0.925278	0.634722	10.6395	-0.178745	5.79133	1.59439	22.2754	5.44662
Z012E0003	0.424433	1.7633	6.72316	6.94065	2.30519	30.1145	1.01372	47.9133	8.47649
Z012E0004	1.27726	1.48513	3.03827	20.191	0.77111	11.6213	3.1007	44.0358	4.95695
Z012E0005	0.0313659	2.1696	5.7588	7.66527	0.774178	30.9954	1.09209	45.3643	9.99011
Z012E0006	-0.0921241	1.22216	3.34164	3.89071	-0.016022	8.98806	0.488125	17.2126	8.37614
Z012E0007	1.10459	0.59189	0.373515	13.0656	0.762281	3.32127	1.58602	19.277	4.92981
Z012E0008	0.635311	2.01679	2.01964	4.46777	0.200599	6.37506	0.442321	13.8881	5.86778
Z012E0009	-0.231137	1.79231	5.44932	32.0527	2.56139	19.8012	9.26713	73.4725	7.1188
Z012E0010	1.73712	1.13729	3.66332	22.1245	0.413186	12.1829	3.63157	51.7672	8.84255
Z012E0011	3.08935	3.14082	2.81777	26.0236	2.12058	21.9715	2.85845	62.6797	9.42952
Z012E0012	2.08505	0.352737	0.377522	14.8857	-0.0119289	2.77902	1.01569	20.7585	4.72638
Z012E0013	0.846405	3.4809	3.63149	8.12985	0.94647	23.8047	0.467391	46.4148	NA
Z012E0014	3.62328	NA	1.96983	10.3964	2.76545	29.8772	1.11824	52.4804	9.95488
Z012E0015	3.84252	2.27169	2.66122	19.0248	0.480336	4.20378	3.51529	31.5853	6.44601
Z012E0016	0.475695	0.515907	0.570512	7.45414	-0.0535583	5.892	0.543302	12.5458	5.16236
Z012E0017	-0.116196	1.00424	4.42104	11.9761	2.98784	44.5441	4.11581	65.9236	8.48894
Z012E0018	1.11224	0.911623	0.952853	21.1851	-0.0694455	1.39888	2.95282	28.0259	4.88229
Z012E0020	1.29706	1.14391	2.94948	6.1784	2.07303	8.51948	1.35921	21.571	6.02519
Z012E0021	0.878185	1.97072	6.48495	3.70903	0.168557	17.9473	0.476118	31.2655	9.47237
Z012E0022	4.23182	1.17354	1.46722	29.1652	-0.0705393	1.20022	6.30604	44.3732	6.0221
Z012E0023	3.6171	2.44286	3.6029	31.6977	0.792271	8.19643	8.26629	55.5701	7.23552
Z012E0024	1.94804	1.0051	2.55558	35.3279	0.286582	10.9825	7.89882	62.4652	NA
Z012E0025	3.42194	0.0189541	2.63699	20.9226	0.499555	6.25358	4.60615	38.7207	6.90547
Z012E0026	2.22992	2.8083	1.36022	15.6835	0.137138	8.81375	4.16226	42.2973	8.43232
Z012E0027	-0.248517	NA	5.31705	2.34554	-0.16241	12.8449	0.808	25.0525	10.0413
Z012E0028	3.49216	0.997615	1.5347	15.6854	-0.0533497	11.8433	3.83754	38.3926	6.65986
Z012E0029	1.27133	2.84764	4.87713	7.3886	0.445434	10.8437	0.879015	28.9938	7.92392
Z012E0030	2.28779	2.98542	2.65089	18.3631	0.783217	9.34012	5.64569	35.7847	7.78712
Z012E0031	1.13695	0.958525	3.89201	2.80402	-0.265074	14.444	0.474725	23.2447	9.05378
Z012E0032	1.02795	1.79088	3.63452	4.46886	1.48915	42.9303	1.77495	55.7186	8.52782
Z012E0033	0.303824	1.51728	2.97541	9.4987	0.224685	6.0294	0.941612	22.3102	5.42944
Z012E0034	0.738283	1.72171	2.25965	2.6689	0.255322	7.81856	0.396753	15.124	5.15886
Z012E0035	3.0879	2.69257	1.96936	26.0028	0.644239	9.31268	NA	49.2392	6.99075
Z012E0037	1.43875	1.7053	2.8604	9.62195	-0.239893	7.41373	0.653295	24.7863	7.48347
Z012E0038	1.2017	3.80244	5.33077	20.9235	3.00346	8.26241	NA	47.7823	9.98171
Z012E0039	1.15542	3.35034	4.31873	7.37275	-0.0489187	25.4304	0.576861	40.7553	8.88666
Z012E0040	3.22684	1.65802	2.75446	21.194	0.859515	27.8019	7.23894	63.9544	4.97817
Z012E0041	NA	3.97294	4.48957	15.7682	0.52943	21.1428	6.19952	55.3842	NA
Z012E0042	0.383227	1.50106	2.66196	13.2588	0.00331885	25.1637	0.879317	47.0335	8.42638
Z012E0043	0.115961	1.57502	3.23243	5.60148	-0.0446814	7.67725	0.415011	21.7897	7.42644
Z012E0044	0.568067	1.2751	4.22246	3.52336	0.131013	18.6022	0.346343	24.1844	6.97209
Z012E0045	3.54594	1.18862	1.35586	23.6007	-0.0763491	13.5071	4.85648	50.1943	9.03413
Z012E0046	1.7141	0.841473	4.66232	26.6945	3.03245	20.0464	NA	64.8759	6.95185
Z012E0047	1.62512	2.93779	5.99908	18.7465	0.847147	22.3157	0.964372	57.14	6.93877
Z012E0048	2.23547	0.671362	1.04027	17.9274	0.719647	3.6729	3.78085	26.8695	4.69693
Z012E0049	4.48448	1.63128	2.4106	11.7738	-0.103763	14.6737	0.827223	29.8808	6.72303
Z012E0050	1.23118	1.10187	1.29772	22.9293	0.545589	5.46613	3.90768	35.4323	7.85393
Z012E0051	0.933463	2.11447	3.34187	4.75132	-0.224243	7.22917	0.563985	21.0486	6.52036
Z012E0052	1.1156	3.49285	7.0741	5.51208	-0.147608	12.7618	0.981856	30.3836	10.1852
Z012E0053	0.938873	1.68463	6.18769	4.23905	-0.211839	16.5872	0.494948	29.1573	8.44641
Z012E0055	2.17375	0.717268	1.25771	16.302	0.0742884	7.45917	2.47491	28.6368	6.26168
Z012E0056	1.29103	1.16309	1.28392	16.4934	0.759075	10.1853	8.45709	39.7843	7.42225
Z012E0058	0.341058	1.61374	4.61819	1.02533	-0.469651	5.64602	0.931947	11.3464	6.94763
Z012E0059	1.31734	0.256463	1.24364	16.8902	0.0012216	1.80288	2.1207	23.0024	5.19795
Z012E0060	0.535391	1.2581	2.95925	7.48791	-0.11429	33.5124	0.76559	46.9839	8.59551
Z012E0061	2.64411	NA	4.36288	7.27389	0.0425091	39.4791	0.532504	65.9447	9.98839
Z012E0062	0.781059	3.58188	3.86582	5.08648	-0.231927	30.0669	0.147885	41.436	8.88593
Z012E0063	0.695621	2.53007	2.298	5.36653	-0.269358	8.36207	0.204895	11.0782	7.43524
Z012E0064	0.0501595	1.11526	8.16557	10.05	0.384347	17.3915	1.24926	45.3818	NA
Z012E0065	1.43831	2.29162	4.38513	6.54008	0.0181811	11.7849	1.0771	25.7611	6.63751
Z012E0066	NA	1.08214	6.49688	11.7601	0.29914	16.7965	3.97679	43.2732	9.94314
Z012E0067	1.10152	1.71114	2.84927	18.6401	2.19975	15.3056	4.8277	47.1047	8.48115
Z012E0068	2.61403	1.82481	3.28905	26.4242	0.053689	9.27309	10.5684	53.3871	7.14028
Z012E0069	1.43952	2.00698	3.0468	4.93644	0.150227	28.3057	0.535586	41.888	7.78557
Z012E0070	2.70113	0.401186	1.58661	14.0344	-0.076185	8.56651	3.09351	31.4177	6.28662
Z012E0071	1.83802	2.70373	5.66749	3.01068	0.191129	44.7308	0.808104	58.8158	9.98678
Z012E0072	0.747789	2.95828	2.29073	9.28638	0.772749	27.9315	1.51029	45.0299	8.17466
Z012E0074	NA	1.88196	3.37051	29.9928	2.6148	16.592	NA	80.1495	NA
Z012E0075	0.219667	2.70726	2.35972	7.13146	0.225281	11.9039	0.486521	32.3552	NA
Z012E0076	0.627202	1.51955	3.085	19.1952	2.01997	14.5846	8.22867	53.9423	7.83772
Z012E0077	2.70585	1.2216	1.8344	26.7349	0.963609	3.44131	8.39033	42.9272	7.18598
Z012E0078	2.17297	2.33364	5.55288	8.45408	0.50697	30.3667	1.00742	69.5923	9.9632
Z012E0079	2.14036	3.16628	6.63965	24.9482	1.13396	30.4508	7.5171	78.726	10.1741
Z012E0080	0.506816	2.35283	3.21662	6.55008	0.596551	17.4472	0.608374	30.1167	9.15748
Z012E0081	0.6367	1.1911	2.39827	19.8172	0.627732	4.0276	4.18318	32.9019	6.51812
Z012E0082	0.958996	4.56043	5.95054	4.0228	0.296717	9.24959	0.619928	24.8225	8.46922
Z012E0083	0.439284	0.80145	5.14851	5.99796	0.5711	31.46	0.351162	41.2356	9.97205
Z012E0084	1.91496	5.28394	3.60295	10.3658	1.38891	14.3962	0.829337	37.0814	10.0051
Z012E0085	0.668648	3.96552	5.49226	6.14019	0.53641	20.3161	0.812617	34.1848	9.95308
Z012E0086	2.23911	1.73865	1.21493	15.857	-0.117627	5.60161	2.63748	28.1226	6.46687
Z012E0087	3.09412	0.946585	1.54109	23.318	0.108371	13.2152	4.02721	47.2261	6.5459
Z012E0088	0.55225	1.63605	4.74273	2.86964	0.918244	11.9947	0.668824	26.1373	7.527
Z012E0089	2.54622	1.09159	2.03123	20.0312	0.305785	6.18543	4.15295	38.9524	7.66909
Z012E0090	NA	0.980331	1.41007	18.2045	1.04222	5.12814	4.15842	32.729	5.00301
Z012E0092	0.728892	2.23548	2.64607	7.41086	0.433284	6.72079	1.43871	19.4581	7.23354
Z012E0093	0.861202	1.52687	3.48289	7.18854	0.0183012	25.8385	0.742688	42.0424	10.1696
Z012E0095	0.876344	1.99069	4.39121	20.5662	0.323446	15.0892	3.23498	49.9971	8.24538
Z012E0096	1.47871	2.47579	3.28085	5.41616	0.216785	27.9744	0.463123	40.0932	9.29713
Z012E0097	1.93035	0.757229	2.7286	19.2543	NA	9.8322	NA	44.6468	5.94155
Z012E0099	-0.406378	4.21385	6.47754	6.31408	1.70334	26.3424	0.629209	47.1224	NA
Z012E0101	2.61416	1.33994	2.25936	20.8555	2.12393	14.8836	4.01192	52.9677	7.35606
Z012E0102	NA	1.11877	4.07559	13.4941	0.90484	11.7342	8.20571	49.0427	8.93882
Z012E0103	0.413477	1.39232	0.608121	14.8674	1.09031	6.65181	3.94139	27.9907	4.94472
Z012E0104	2.86911	0.634586	2.07419	12.5849	0.389143	8.08729	1.6818	26.5841	6.30143
Z012E0106	0.147844	1.29789	5.35996	4.2925	1.55202	43.488	0.730608	59.4488	9.95677
Z012E0107	1.01943	1.54722	2.78709	11.4806	0.207515	13.9396	1.17222	34.5951	5.87784
Z012E0108	1.58253	1.55757	4.62844	17.6339	0.737811	8.146	3.88828	38.2234	7.18999
Z012E0109	2.51323	0.451466	0.877244	17.1046	0.223559	4.22873	2.88093	27.4565	6.71866
Z012E0110	2.58132	0.878987	2.68639	18.4793	0.360754	10.3557	3.81267	38.0452	5.94815
Z012E0111	1.36049	0.521988	0.64001	12.2188	0.80642	11.3985	1.19533	26.6278	6.98339
Z012E0112	1.62662	2.65192	4.11536	12.6475	0.464209	10.9291	2.18146	36.2162	9.43711
Z012E0113	1.18165	2.32608	2.02445	5.07164	0.79014	4.56454	0.774348	16.4189	5.77329
Z012E0114	1.17615	1.29393	4.55524	6.87203	0.248177	26.0962	0.653374	43.9641	8.50689
Z012E0115	0.95626	0.776341	3.39832	9.4793	0.673925	14.1763	3.42957	31.3593	9.43533
Z012E0116	3.22378	1.41541	2.00926	19.7412	0.614442	4.57032	3.61936	30.2744	5.81936
Z012E0117	2.76485	1.40532	2.19545	16.0778	0.784204	9.12785	2.90849	32.5828	6.74014
Z012E0118	2.61893	NA	NA	7.76053	0.17803	17.0469	1.4638	42.7067	9.99098
Z012E0119	-0.115325	0.307577	2.48785	17.6016	2.87775	9.63344	NA	36.5544	6.92073
Z012E0120	1.46417	0.660189	2.02642	16.9096	0.148549	16.873	2.76893	37.3588	6.43829
Z012E0121	3.42933	0.969	1.09115	16.4441	0.0445112	7.67954	2.70635	28.8322	5.19354
Z012E0122	1.83745	0.66543	1.25149	22.721	0.268407	5.56081	5.29331	39.133	6.13185
Z012E0123	1.91755	1.80899	9.23453	9.03519	0.746206	33.0073	1.58151	63.0769	9.95514
Z012E0124	1.3204	3.24579	5.14098	5.63993	0.207033	11.5801	0.516055	28.9909	8.43922
Z012E0125	0.56996	3.08902	8.34026	5.40458	0.294666	17.8191	0.704269	39.8197	10.0329
Z012E0126	-0.00191931	2.08993	4.42716	5.96629	1.29075	10.0633	0.969919	24.4637	7.04338
Z012E0127	1.00698	1.28551	1.72019	5.84753	1.96291	30.1556	0.257973	43.2494	NA
Z012E0128	1.91778	1.96887	2.28659	12.7576	0.347659	11.6205	3.00248	33.0131	6.73207
Z012E0129	1.82588	3.39879	5.12479	11.7433	1.84356	27.0029	1.47583	41.832	NA
Z012E0130	-0.226298	2.49924	3.87242	3.14003	-0.0961523	45.8813	0.491357	60.1798	9.99986
Z012E0131	0.97597	2.74686	7.72822	13.7697	0.774553	30.488	2.5347	55.4154	9.97773
Z012E0133	3.7287	0.484169	0.476219	19.0328	0.736994	3.18073	3.84993	31.1514	5.43217
Z012E0134	1.1615	-0.720062	4.36203	5.52617	0.20646	23.7554	0.74876	36.4666	10.1705
Z012E0135	NA	NA	4.86684	26.1716	0.660826	3.09937	NA	52.5258	6.99393
Z012E0136	0.161598	2.15613	6.41812	6.61997	1.60764	NA	1.47311	79.3796	9.97255
Z012E0137	NA	NA	6.67961	10.7404	-0.0419068	14.0675	1.67209	40.7873	9.98539
Z012E0138	3.22118	3.60487	2.72659	36.664	1.13851	3.46666	NA	55.2391	7.04456
Z012E0139	2.05158	0.13142	0.811722	9.42059	-0.11577	4.69562	1.19954	16.2554	4.72492
Z012E0140	3.33013	1.17474	2.36873	23.0064	0.0380087	4.638	NA	38.7283	7.25834
Z012E0141	2.99238	0.812918	2.22141	16.5234	-0.0769884	10.9071	2.72467	36.8096	7.18784
Z012E0142	2.48699	1.06837	1.40649	15.3985	1.41458	7.34659	4.83572	39.2779	8.44759
Z012E0143	1.60666	1.56064	2.25682	13.6705	0.345069	4.55489	2.517	25.0499	5.44259
Z012E0144	1.11458	1.92314	5.20654	10.7153	3.25644	21.2343	1.66057	45.7048	9.97448
Z012E0145	3.07903	2.52655	4.64475	15.1322	1.0184	12.6271	4.67772	35.9832	NA
Z012E0147	0.328323	2.02502	6.21872	10.5863	0.0706241	34.062	1.97603	60.2444	NA
Z012E0148	-0.22756	1.84931	0.672029	14.9195	-0.306876	16.6098	0.989434	43.8558	9.70172
Z012E0149	0.0527496	2.79059	4.40315	4.98932	1.08519	23.7556	0.65688	36.9867	9.96273
Z012E0150	2.84241	0.8813	2.67452	22.5612	0.63221	7.43254	NA	45.1274	4.97262
Z012E0151	1.39684	1.33647	0.68211	3.47582	-0.126553	4.94203	0.139744	11.0077	6.70187
Z012E0152	1.17534	1.16181	2.51043	20.7986	0.758367	12.08	NA	43.701	6.96581
Z012E0153	2.40867	1.09434	3.31932	23.4542	0.0798973	9.18543	4.6659	44.4207	6.04254
Z012E0154	0.711604	NA	4.20079	13.4921	0.221983	46.1195	1.84023	74.8463	NA
Z012E0155	0.422846	NA	2.77571	5.29881	-0.0552158	10.2875	0.382563	24.4051	7.44095
Z012E0157	1.4367	1.36875	2.97641	5.2066	-0.0476405	4.64924	0.64957	15.6035	5.35895
Z012E0158	1.29482	NA	2.59886	3.47697	0.198509	26.5411	0.603641	35.8142	9.97171
Z012E0160	0.70083	1.63013	6.55947	7.23363	1.45376	23.9447	1.44287	45.4943	9.96158
Z012E0161	1.54844	1.08871	3.83591	5.9126	0.970842	16.3122	0.932777	29.1391	NA
Z012E0163	1.42672	1.71801	2.09453	12.3753	0.285754	7.49942	1.3467	26.9025	6.4798
Z012E0164	1.95624	1.03835	1.10955	9.31698	0.0341545	6.82116	0.767389	22.8804	5.6299
Z012E0165	0.756161	1.18209	3.89015	0.646972	-0.194026	16.5832	0.400244	21.1504	8.48245
Z012E0166	1.73346	NA	3.28587	6.13089	0.0927633	22.5988	0.780108	38.975	9.96085
Z012E0167	0.755133	2.88242	3.38216	6.68932	0.251094	29.5581	0.575641	47.8683	9.51582
Z012E0168	2.25097	2.60192	4.38928	2.32403	0.608713	18.7374	0.552954	31.6117	6.96262
Z012E0169	1.1152	3.02138	3.75096	4.26547	0.217365	31.7518	0.300083	44.69	9.96945
Z012E0170	1.67493	2.00953	3.65124	20.2201	0.537592	11.3437	4.99217	43.2327	7.63507
Z012E0171	2.75328	0.699953	0.863074	19.7051	-0.217848	4.27314	1.67683	27.1422	7.20676
Z012E0172	NA	0.861671	0.942603	17.559	0.576212	8.4011	4.29173	35.1545	5.42919
Z012E0173	1.18755	1.79979	2.08591	17.7077	1.14998	8.26319	3.66095	34.3758	7.47642
Z012E0174	0.891943	3.75121	4.49067	2.57704	0.381777	16.5392	0.467075	30.8779	9.91433
Z012E0175	1.11362	2.25849	5.80181	2.39518	0.108398	14.7145	0.504098	24.9596	8.4817
Z012E0176	1.12682	1.78209	4.05593	4.33331	0.0901955	11.8175	0.208574	21.0091	7.12665
Z012E0177	3.1231	1.59316	4.39569	18.1038	NA	25.0708	8.14431	66.406	7.43499
Z012E0178	1.37255	1.25642	2.76964	15.9925	0.53907	14.0076	6.40805	41.3872	7.1802
Z012E0180	0.889865	1.43489	3.95831	4.75779	-0.171948	7.35818	0.198341	22.6683	5.95393
Z012E0181	3.04578	0.50437	0.812069	15.0999	0.354399	5.09281	1.92623	25.7253	5.17877
Z012E0182	1.06167	2.29555	2.44131	3.45874	-0.109418	11.5921	0.348244	24.5152	7.4272
Z012E0184	2.34286	2.01895	2.50019	22.7004	0.957979	11.9595	3.48327	50.4726	8.84003
Z012E0185	2.91275	1.72958	3.14138	13.8933	0.797537	20.692	3.19663	46.001	7.74945
Z012E0186	1.76593	2.73552	3.86578	19.5023	0.559356	11.2757	3.49618	48.6894	7.84642
Z012E0187	0.819035	3.61398	4.69427	7.54396	1.1604	21.9802	1.03074	41.7325	9.82023
Z012E0188	3.65728	1.77971	2.97372	24.1612	2.24632	6.11929	5.87448	48.402	6.0754
Z012E0189	3.02002	0.535081	2.00988	15.7004	0.0977092	6.50828	1.80498	30.9232	7.10509
Z012E0191	2.02644	3.69005	5.08328	11.4728	2.43919	30.8202	2.78315	61.5418	10.1294
Z012E0192	0.702448	4.71921	4.62292	8.22027	1.81388	31.2191	1.00821	75.4421	10.0185
Z012E0193	-0.200694	1.18995	4.19382	8.39149	2.17422	20.5139	1.43741	35.6434	5.02147
Z012E0194	1.34319	2.49338	1.99161	8.8106	0.195868	7.4464	1.11643	22.5931	6.51488
Z012E0195	2.45664	1.16005	4.50212	16.5341	0.227523	14.4856	3.38878	41.9406	6.94421
Z012E0196	2.13401	1.39786	1.1276	16.0271	0.313101	6.01422	2.0863	27.2941	6.97362
Z012E0197	2.66067	3.71214	2.00611	6.75765	-0.108368	23.9145	0.465623	40.5766	7.88679
Z012E0198	1.14474	1.26294	1.73972	3.86827	-0.121098	5.45108	0.552652	14.4696	6.27124
Z012E0199	1.55915	NA	NA	5.8057	0.59616	NA	1.62853	83.532	9.97338
Z012E0200	2.3028	2.91295	5.35243	4.84185	0.355226	35.5099	0.12214	50.3826	10.0521
Z012E0231	1.29639	1.81109	2.06287	26.7723	1.61377	13.6125	8.69209	57.4954	4.96334
Z013E0001	0.0245173	1.41922	6.48541	4.31489	1.04872	33.3111	0.27226	45.5871	7.81616
Z013E0002	1.9799	1.13809	2.889	18.7921	0.0677912	14.6899	3.39231	43.3626	6.52318
Z013E0003	0.154084	2.29144	4.53937	5.54041	-0.42076	20.4509	0.836196	35.0647	7.27513
Z013E0004	NA	2.81652	3.18515	21.3943	1.94583	13.1534	4.91789	60.5103	7.01365
Z013E0005	2.44475	0.832466	1.25963	16.4168	1.20268	5.39465	4.13315	32.7842	6.1218
Z013E0006	0.177311	3.36179	6.72659	1.47462	1.06822	18.4028	0.180837	31.6004	7.27672
Z013E0007	0.0504606	2.09395	5.08995	3.91441	-0.191255	21.1655	0.126983	32.3298	7.79906
Z013E0009	3.03973	0.579371	1.06044	19.1326	1.406	9.60308	3.29474	41.381	6.0695
Z013E0010	0.083631	2.64906	4.25064	3.03553	0.268153	13.3667	0.187808	23.062	6.06555
Z013E0011	1.58156	1.4456	2.09887	22.5201	-0.126887	10.1564	NA	43.8283	6.9214
Z013E0013	NA	2.15719	2.0302	15.1041	-0.0357261	11.9919	2.66781	37.2312	6.64086
Z013E0014	-0.823634	NA	4.46772	4.58521	0.615391	21.4344	0.302982	41.7147	8.13723
Z013E0015	-0.0642243	3.79165	8.13969	3.85223	0.0826979	25.9612	0.512059	47.0502	8.47783
Z013E0016	NA	3.7888	3.27346	21.8508	3.46396	11.6829	6.85505	65.8632	7.5493
Z013E0017	4.2081	1.38746	2.7254	15.085	1.8787	11.6633	6.63777	47.54	7.01774
Z013E0018	1.24493	2.38786	8.1558	3.77686	1.99662	26.4462	0.296345	47.5267	9.50368
Z013E0019	1.97562	3.84653	6.87092	8.53927	0.969487	21.9645	3.40619	51.8683	8.13552
Z013E0020	0.887811	1.78921	5.90496	2.44156	1.90061	25.7886	0.237252	40.913	6.54894
Z013E0021	1.3839	0.826248	1.05234	13.16	0.311991	8.9939	1.65631	28.9145	5.87369
Z013E0022	1.96635	1.68989	2.28255	18.33	0.169446	16.5287	2.48523	43.9334	7.03474
Z013E0023	NA	3.60364	2.88175	14.783	0.658639	14.0094	5.61623	47.272	7.6409
Z013E0024	0.0951545	2.2764	3.75458	2.56749	0.763007	26.5158	0.257124	38.0377	9.55027
Z013E0025	0.996434	1.13865	2.97779	1.51836	-0.174953	15.7633	0.188094	27.7478	7.08744
Z013E0026	0.942068	1.28822	3.95236	5.28272	0.770764	26.135	0.249228	37.406	8.54765
Z013E0027	1.3662	0.948447	3.76326	12.911	0.79065	15.4395	2.84474	40.1345	6.62822
Z013E0028	0.793611	0.449196	0.72378	8.00191	1.55908	5.41536	0.809955	15.4012	5.59787
Z013E0029	1.35184	2.32492	2.65418	19.5315	1.1173	9.7806	2.35276	46.7916	6.08813
Z013E0030	1.5167	3.16646	6.49881	1.8976	-0.010508	17.5967	0.274517	30.6	7.2563
Z013E0031	3.25177	0.986981	2.11221	13.4239	-0.267118	12.4304	1.54599	33.9448	6.27327
Z013E0032	1.3985	0.262962	1.23995	10.0373	0.796911	6.97934	0.762872	22.2667	6.00578
Z013E0033	0.249383	0.816209	5.74417	3.22846	-0.0505063	33.7804	0.326285	43.6845	10.2645
Z013E0034	3.75133	1.14809	2.36762	22.4596	1.03127	10.8973	4.84234	48.6231	6.54007
Z013E0035	-0.512293	1.32385	4.62681	3.0325	1.78744	16.0314	0.221011	32.0553	6.1057
Z013E0036	0.241502	2.60434	9.2115	3.55926	0.412266	44.1682	0.259352	64.3261	9.99364
Z013E0037	NA	1.51158	1.00149	18.863	0.805502	8.33084	3.29269	39.8975	5.54234
Z013E0038	0.405966	1.65281	3.0614	2.25598	0.470418	12.4461	0.233101	19.0161	5.10108
Z013E0039	1.18288	1.24651	2.1629	29.9945	0.0963492	12.4706	6.55804	58.9902	7.55701
Z013E0040	0.714055	NA	7.07609	3.32724	-0.133357	22.0239	0.372925	38.4777	8.39023
Z013E0042	2.76285	1.48305	1.85775	15.713	0.920953	7.28068	4.19073	32.6894	6.05922
Z013E0043	3.33978	1.65236	2.64782	22.0091	1.14549	14.8977	7.62667	56.3364	6.47745
Z013E0044	0.937516	2.24989	7.08789	2.73627	0.225058	32.2119	0.180019	50.7785	9.39132
Z013E0045	1.4406	4.5047	5.76145	3.62305	-0.0586762	30.0832	0.442927	51.5941	8.32033
Z013E0046	-0.164016	3.01235	7.25511	4.67596	0.32174	32.0858	0.20575	49.7421	7.46174
Z013E0047	1.75519	2.89192	6.02066	2.58135	-0.183263	20.1483	0.31884	32.6059	6.5228
Z013E0049	0.430274	1.60237	4.85641	2.54934	0.152536	16.4547	0.22849	24.6993	6.78174
Z013E0050	1.79134	2.03228	1.25739	21.0796	-0.0314335	9.9422	4.14455	43.7884	6.04965
Z013E0051	1.03458	1.1945	9.88718	3.27239	0.593275	33.8587	0.182345	52.8386	9.38051
Z013E0052	2.97975	2.07557	1.58305	20.9034	0.624736	9.40251	3.124	47.4533	6.55155
Z013E0053	1.12652	1.11883	2.20171	21.3477	1.86858	18.5694	6.54734	52.1721	6.82887
Z013E0054	0.570191	4.12499	5.59951	4.2846	-0.0667201	NA	0.0660212	64.6275	10.4633
Z013E0055	3.02561	3.07523	4.79265	2.01897	-0.0775641	19.0437	0.229107	34.0672	7.24821
Z013E0056	2.14174	2.01159	2.87814	13.5648	0.149955	12.8483	5.50216	38.7113	7.25678
Z013E0057	0.325996	0.886265	2.87158	2.00211	2.25153	22.484	0.0258601	28.3711	6.94671
Z013E0059	1.86855	1.23829	8.37343	3.807	1.48533	27.1156	0.626093	52.3164	9.26169
Z013E0060	2.65098	1.03577	5.60063	3.63768	0.422577	16.0805	0.369789	31.9322	6.63544
Z013E0061	0.818721	1.2663	10.6615	2.13546	0.953458	35.6988	0.278824	56.4243	9.97247
Z013E0062	0.676512	0.907526	2.93554	11.4618	1.60439	7.86201	6.35272	33.0549	5.63292
Z013E0063	0.949461	2.09034	5.55177	3.12781	1.02208	23.7271	0.37414	36.9467	7.28279
Z013E0065	0.54238	4.41976	9.37489	2.92976	1.58005	28.0119	0.234159	48.739	9.00838
Z013E0066	0.43931	2.52964	6.91227	3.15558	0.23525	31.3531	0.277481	46.4735	NA
Z013E0067	0.120289	2.75324	8.19669	3.22383	0.258455	31.0331	0.34757	46.8196	8.71664
Z013E0068	1.8314	1.2228	2.80051	15.9621	0.563067	9.64862	3.03866	32.7208	6.82095
Z013E0069	1.08554	1.2374	4.62723	2.45202	1.47543	28.3117	0.203269	45.1851	8.64315
Z013E0071	3.76003	2.98137	1.73016	19.2964	-0.186827	12.3635	3.05929	46.2635	6.32846
Z013E0072	0.75716	1.77155	4.49383	2.18082	0.558706	29.412	0.184674	44.2143	7.48746
Z013E0073	2.28393	2.72569	1.54536	24.1364	1.08459	11.503	4.31215	51.4161	7.63305
Z013E0074	1.69872	1.36427	3.46135	16.3505	1.70673	14.5372	4.77828	47.4053	6.97042
Z013E0075	0.375412	1.19876	5.6177	4.79812	-0.238462	33.7348	0.488654	49.1998	9.76657
Z013E0076	2.19646	1.54195	2.62236	14.8656	-0.482075	12.8139	3.88049	40.2077	6.10073
Z013E0077	0.205611	2.34659	5.26991	1.95103	-0.190123	13.5115	0.214253	22.5611	6.80506
Z013E0078	0.893051	1.41305	1.87018	22.4383	0.433404	7.93507	3.15252	38.8546	5.64399
Z013E0079	1.61684	1.77666	3.63591	4.95128	-0.10004	24.6091	0.428928	36.3849	8.63676
Z013E0080	1.15803	1.98243	2.40944	13.1025	-0.412693	11.8368	2.87191	34.3803	6.11358
Z013E0081	0.906868	2.50592	3.94685	2.71495	-0.292838	21.7052	0.237105	31.3135	7.05317
Z013E0082	0.963555	2.57718	4.15953	3.98625	-0.167393	22.465	0.092446	34.1262	8.1032
Z013E0083	0.784783	2.07201	4.58052	2.06146	0.343008	18.3997	0.0798516	27.5951	7.99432
Z013E0084	0.323237	NA	8.86399	2.75676	1.17662	26.878	0.392702	48.7238	7.7435
Z013E0085	NA	2.33152	3.72858	19.2442	0.184533	15.5671	4.98962	51.4268	7.63776
Z013E0086	2.05566	1.75174	4.58147	11.0714	0.102088	14.9294	0.335896	38.4234	6.3648
Z013E0087	1.6098	0.65678	1.82342	15.3711	-0.293481	10.4414	2.66102	33.6685	6.09983
Z013E0088	-0.0469322	3.71057	4.63314	2.63431	2.35895	22.7023	0.120057	37.8965	6.9689
Z013E0089	0.471222	4.5595	6.24455	4.95617	0.698751	33.1888	0.141875	52.5498	10.3264
Z013E0090	1.92265	0.431967	1.35192	14.031	-0.36368	13.5049	2.72619	32.1498	6.0972
Z013E0091	2.34754	0.576959	2.81403	15.4212	0.938234	13.3881	3.76659	37.1016	7.23475
Z013E0092	2.22604	4.05382	1.56554	17.0405	-0.172634	10.4455	5.57592	42.5129	6.62334
Z013E0093	2.37123	1.08357	2.08867	17.6205	0.503433	14.8844	4.19022	52.2631	6.63542
Z013E0094	2.79217	1.83567	1.74009	16.864	-0.0859883	12.2152	2.58653	37.4241	5.6333
Z013E0095	1.49885	1.23631	4.77049	3.87371	-0.0149008	26.1958	0.169192	39.8659	8.33469
Z013E0096	NA	2.93992	3.96631	15.9512	0.717346	13.3432	3.93537	47.3453	6.63281
Z013E0097	0.580332	2.79289	3.59672	4.15533	-0.0827402	24.4281	0.506629	39.6757	7.9993
Z013E0098	3.42219	1.97633	3.16421	24.5074	3.31694	14.2411	6.1412	62.4046	6.98775
Z013E0099	0.548286	1.07432	0.63428	6.94872	0.848152	23.8118	0.683134	45.7125	9.42306
Z013E0100	0.692586	3.01522	6.9441	3.78939	0.0408678	21.1762	0.417951	36.1368	8.32006
Z013E0101	3.92694	1.09	1.24727	18.2295	-0.395736	11.1026	2.46138	36.3155	5.81789
Z013E0102	2.09147	1.41233	0.822385	14.8165	0.427847	8.60517	2.4543	31.5841	6.53857
Z013E0103	0.765007	3.40127	5.62094	2.40439	-0.339205	27.9237	0.181387	42.083	7.55082
Z013E0104	1.58075	1.61187	1.5981	15.0988	0.563628	7.16019	3.8252	32.712	5.14025
Z013E0105	1.27988	1.09938	3.56768	18.5461	1.44027	16.6409	7.0805	52.4904	6.63848
Z013E0106	2.6353	2.08143	3.986	22.2987	0.734062	11.6833	7.77604	57.6868	7.55251
Z013E0107	0.950423	0.895281	2.7198	13.9357	1.11942	19.3408	5.46365	48.8366	7.03992
Z013E0108	0.68755	2.04143	5.56788	14.7239	0.503212	20.5238	4.3087	49.3051	6.62178
Z013E0110	NA	1.95556	3.29982	27.7004	0.0953867	14.8714	5.91484	62.6216	7.98487
Z013E0111	0.0606436	1.38024	4.98053	14.2895	-0.128864	15.842	3.4508	41.2896	6.63816
Z013E0112	1.81736	0.880923	1.57512	19.5832	1.26702	9.37529	4.41506	39.4208	6.99122
Z013E0113	1.98351	0.494173	1.80097	13.891	0.198397	7.52829	2.60826	27.1079	6.08794
Z013E0114	0.789912	4.077	9.27188	3.48209	1.56033	35.2465	0.27716	57.0118	10.5022
Z013E0115	1.61035	1.68552	1.61022	10.8973	-0.314207	7.91276	3.29412	25.5529	5.37387
Z013E0116	0.324309	1.21001	2.40372	9.98569	0.346541	11.5265	2.31315	28.5914	5.63077
Z013E0117	1.12673	0.475636	2.28958	8.34203	-0.0240303	14.1075	0.604634	25.6651	7.22825
Z013E0118	1.50821	1.13513	4.58562	21.6435	1.49525	12.1745	9.30199	54.9716	7.63408
Z013E0119	0.705315	1.67382	4.02354	4.3393	-0.00874156	25.45	0.243233	38.2668	9.37308
Z013E0120	0.499152	2.20833	7.74707	3.76495	2.21101	37.7363	0.139808	56.3354	9.98034
Z013E0122	2.40478	0.719756	3.01468	19.9687	-0.250867	10.2616	3.6011	41.0396	6.52273
Z013E0123	2.49357	2.50712	4.5181	19.2264	0.958984	14.8858	3.67722	51.1474	7.26758
Z013E0124	-0.0671265	3.30184	7.54774	4.71851	0.677815	36.6703	0.4282	55.4333	9.48212
Z013E0125	2.68103	2.48988	4.6412	20.2199	0.409472	12.1183	6.60195	50.6298	8.1382
Z013E0126	0.990283	2.12323	4.39975	14.7468	-0.0114866	16.9144	3.18612	44.8839	5.78756
Z013E0127	0.689958	0.318044	2.85017	22.1265	0.563912	10.4353	5.21263	45.3949	6.55701
Z013E0128	0.832211	1.01645	3.70185	3.48396	0.528373	16.5212	0.240595	29.3679	7.13995
Z013E0129	1.1993	2.59053	5.3362	3.23432	0.109117	21.5577	0.128067	36.5518	7.23062
Z013E0130	1.49636	4.86874	10.7758	2.97658	0.554794	38.7937	0.126852	60.6986	9.97097
Z013E0131	1.11577	2.00273	3.23941	14.7365	0.286039	13.657	5.48749	41.2301	7.55877
Z013E0132	2.05895	4.30142	7.59245	2.47254	-0.140157	20.0821	0.101648	37.1057	8.58199
Z013E0133	0.508746	1.40217	4.25137	7.61557	0.924667	22.1864	1.34109	38.5415	8.13121
Z013E0134	4.53883	1.4635	1.589	17.6756	-0.217363	8.34275	2.84599	38.0777	6.04642
Z013E0208	0.423042	1.22295	1.76772	16.7437	0.0466033	6.10653	3.23908	33.423	4.63687
Z013E0211	3.68296	2.18257	2.22836	22.1258	0.0419017	9.20236	5.0432	45.6909	7.01692
Z013E0222	1.00956	4.21838	7.75316	1.18224	-0.186481	30.692	0.184306	47.1902	7.48188
Z013E0226	4.03211	3.85651	2.61117	24.4607	0.586287	13.1856	5.50753	58.7914	7.33892
Z013E0242	0.194676	3.25129	9.10594	3.96129	1.31618	44.1481	0.12181	61.4791	10.4619
Z013E0247	0.334395	2.57433	6.98486	2.79164	0.290077	26.6061	0.400886	41.5286	8.54474
Z020E0001	1.60545	0.873282	1.29357	20.741	0.690985	1.5892	5.38094	31.4936	4.84548
Z020E0002	0.40576	0.502804	1.24588	3.9629	1.32885	0.305917	1.16346	8.33294	2.61164
Z020E0004	1.85351	3.47523	5.88501	10.817	1.07578	3.21334	2.1946	30.5884	7.2286
Z020E0005	0.670515	0.824193	2.26366	21.3462	1.90275	3.37799	3.84938	33.4577	5.05148
Z020E0006	1.04037	1.03872	2.80253	21.4882	0.800711	9.58967	3.62203	40.6583	6.8559
Z020E0007	0.659306	2.21923	1.59996	5.73821	2.23115	2.39233	5.09675	20.3673	5.09696
Z020E0008	NA	1.63781	2.29462	8.70593	0.794383	2.46544	NA	24.0034	5.02943
Z020E0009	0.41858	1.58902	2.81861	4.53497	0.287326	1.22699	0.546669	11.5348	4.41853
Z020E0010	1.35483	0.836261	1.41528	12.3185	1.51228	1.07852	3.18563	22.7532	5.74546
Z020E0011	0.964732	0.929332	1.56304	14.6623	1.71811	5.41628	3.10252	30.8731	5.74647
Z020E0012	1.76281	0.738615	1.41678	12.9665	0.371796	6.87291	3.35353	27.8332	5.67055
Z020E0013	1.26508	1.29391	2.37352	7.38383	0.430192	2.66564	5.10551	21.8524	5.24297
Z020E0014	0.412604	0.857327	3.06285	5.81565	0.763634	5.55101	0.880432	16.1146	5.74596
Z020E0015	0.611691	1.45473	3.12027	10.6779	0.972914	1.69216	1.73439	19.346	4.74615
Z020E0016	1.09218	1.17689	2.33879	16.9389	0.688558	7.18787	7.06594	35.8096	8.12228
Z020E0017	1.27012	0.863898	6.02192	18.5339	0.947787	7.26859	1.30589	40.0061	7.93664
Z020E0018	0.628244	2.14564	3.54042	3.13042	0.747567	0.291358	1.35095	11.1986	4.4468
Z020E0019	2.05547	0.554018	1.59383	12.0901	0.297818	2.67803	2.47294	21.8168	4.88433
Z020E0021	0.999295	2.06229	4.54408	8.67044	0.943413	16.1421	1.25584	33.0862	NA
Z020E0022	0.314946	0.683557	2.09842	2.6574	0.649437	1.14573	0.801253	8.29717	3.69238
Z020E0023	1.01162	0.836093	1.54843	4.43748	2.35256	0.256487	6.2249	14.8339	4.66026
Z020E0025	0.278408	0.996391	2.00916	3.88528	0.580205	1.10306	0.601025	9.099	3.37457
Z020E0027	0.879686	0.80973	0.946766	8.14571	1.11569	1.1527	2.33655	15.1548	3.58166
Z020E0028	1.23691	1.08109	2.59017	23.6494	1.02771	9.00818	4.07163	44.9426	5.07455
Z020E0030	0.611513	1.20589	2.15218	7.19879	1.43712	3.84213	3.85962	19.0582	4.62781
Z020E0031	0.52093	1.14505	2.20976	4.6917	1.59352	1.44597	0.814669	12.1146	4.24409
Z020E0032	0.284312	1.26143	3.43678	2.48076	0.570865	0.537555	0.659435	8.30053	3.82148
Z020E0033	0.771768	0.640897	1.32576	4.67644	0.480799	1.70777	1.93022	13.8678	3.24738
Z020E0035	1.41862	1.85538	2.39227	7.45043	0.279149	9.01499	0.96308	21.7595	4.25278
Z020E0036	0.322398	2.42448	2.82273	4.81234	0.741804	0.931844	2.51889	13.5787	5.0973
Z020E0037	2.14222	0.841989	1.64849	10.5427	1.20471	5.36591	6.25978	29.0896	5.77417
Z020E0038	0.282835	1.03724	2.52857	13.3142	1.32205	9.23198	4.50532	33.6897	5.74544
Z020E0040	0.86208	1.20915	3.1607	4.24296	0.435488	1.32588	1.87114	13.0713	NA
Z020E0041	1.19368	1.02305	2.49481	27.0103	0.706291	12.0643	3.4904	47.1889	NA
Z020E0042	0.498594	1.72056	3.59282	7.69542	0.630535	12.1976	1.24167	27.2719	6.63851
Z020E0043	0.56244	0.441027	0.660063	9.5202	0.61155	1.64606	0.983937	15.0248	3.13957
Z020E0044	0.693981	0.902304	2.9937	4.13484	0.46311	2.34306	0.736051	12.7458	NA
Z020E0045	0.599801	2.3921	5.32366	5.63868	0.988409	2.19103	1.81722	19.4891	4.99322
Z020E0046	0.39707	0.489117	2.63368	4.84391	0.417308	8.02309	0.83102	17.8324	6.61054
Z020E0047	0.594763	0.966887	1.74935	5.07376	0.57675	1.65564	2.64334	14.3381	3.74557
Z020E0048	0.236136	1.13566	2.71381	1.89164	0.335164	2.47686	0.85763	9.73973	3.43499
Z020E0049	1.90497	1.17605	1.95903	7.48089	2.58359	4.47911	2.39844	20.1182	4.76081
Z020E0050	1.05159	2.11545	2.83855	2.65978	0.687	1.38039	0.718427	10.3522	4.14448
Z020E0052	1.58581	1.29236	1.13192	5.94934	1.13386	1.47467	4.06548	18.2201	8.03174
Z020E0053	1.99612	1.05298	1.80795	6.15402	1.46114	2.24992	NA	17.4689	4.54805
Z020E0054	0.0742406	0.455503	4.96396	4.59798	0.956759	8.6063	0.826408	20.7955	6.16949
Z020E0055	0.548984	0.199839	0.679763	1.87003	0.237615	0.515781	1.06945	5.31297	2.03693
Z020E0056	0.0550889	0.999899	2.57574	4.78634	0.517313	1.85064	0.6857	9.59652	3.03731
Z020E0057	0.385072	1.22313	2.80022	4.46729	0.6192	16.1811	0.673029	29.9843	8.16076
Z020E0058	1.35894	0.898483	1.09938	5.56691	0.316916	0.756963	3.29314	15.3568	4.43329
Z020E0059	0.302525	0.683974	1.50781	3.70613	1.24379	3.8959	2.29516	13.9652	6.40822
Z020E0060	0.6834	1.02809	2.0425	5.96063	0.167506	4.76061	0.783037	15.2473	5.72998
Z020E0061	1.86952	1.02827	1.81985	6.76932	0.359714	1.16152	2.69117	16.7085	5.25361
Z020E0063	0.612035	0.658605	1.3155	9.85843	1.04838	4.98047	2.86916	20.8545	4.25503
Z020E0064	1.42638	1.02565	1.88051	4.75315	0.831829	1.97249	4.31697	17.6638	5.24833
Z020E0065	0.872582	1.04524	1.51348	14.6387	0.337218	7.23824	2.76369	27.2727	NA
Z020E0066	0.211588	1.47699	2.54419	4.36521	0.626029	4.05195	1.58553	14.1979	5.10643
Z020E0067	1.43534	2.15969	3.02819	7.09486	0.467977	9.66348	1.46041	28.16	6.24303
Z020E0068	0.479112	0.83687	2.2367	3.90029	0.726743	5.86972	1.95699	16.8997	5.96544
Z020E0069	0.325607	2.49065	4.45762	3.62778	0.773069	1.54594	1.00761	13.4212	5.97335
Z020E0070	0.320393	1.07881	2.12548	1.02865	0.36053	1.27589	0.596339	5.44671	3.04715
Z020E0071	1.44124	1.00828	1.56723	16.1634	0.494094	1.84274	3.68107	28.6032	5.95433
Z020E0073	2.20423	1.23529	2.2914	19.5469	2.53619	2.95006	3.69388	35.0954	6.23509
Z020E0074	1.04329	1.37536	2.50079	4.33157	0.661257	2.67131	2.99655	17.4109	5.06133
Z020E0075	0.120538	1.19431	3.92062	1.95335	0.259006	4.37944	0.512817	12.6375	3.83542
Z020E0076	1.61214	1.01194	1.46367	11.4135	0.475704	1.90562	2.17431	21.0628	5.16917
Z020E0077	1.12092	1.02127	2.07547	12.832	0.635221	7.05163	3.15175	27.3975	4.86752
Z020E0078	0.349226	1.3159	2.97726	2.74092	1.43518	4.49061	1.1449	15.9358	4.66241
Z020E0079	0.419027	1.20409	3.21974	14.7661	1.85926	10.2652	2.13615	35.2624	6.61177
Z020E0080	0.582809	NA	2.25584	5.1371	2.81307	1.75169	0.902469	14.4457	5.02525
Z020E0081	1.52268	0.753889	1.78775	18.9378	1.3503	6.39744	3.01682	36.4248	4.55308
Z020E0083	2.28402	0.643447	1.25842	2.81949	0.193185	0.474314	2.49203	8.93584	3.57706
Z020E0084	0.970851	0.70044	1.33097	6.50383	0.345695	2.09822	2.57536	13.5449	3.66679
Z020E0085	0.678161	0.907224	2.69226	4.98275	1.25187	3.13432	3.04458	16.7546	3.73798
Z020E0086	1.59938	1.86326	2.04327	17.4369	0.430629	9.88992	1.89482	33.8631	6.24972
Z020E0087	0.470892	1.77897	3.7449	7.01328	0.368056	13.3399	0.659781	25.5184	5.96713
Z020E0088	1.5483	2.28193	5.03331	5.24475	1.24402	3.85956	1.51214	18.7981	6.24237
Z020E0089	0.860145	0.470685	1.07694	4.50748	2.56823	2.26351	2.2196	13.1484	4.41738
Z020E0090	0.608363	0.595162	1.15472	4.46874	0.315341	2.28461	1.881	12.1591	3.9426
Z020E0091	1.08374	0.39529	1.11102	4.84198	0.952133	2.4688	2.12695	13.6311	4.15429
Z020E0092	0.0449077	0.814457	1.70408	3.72796	0.236471	0.607612	0.59564	8.09158	3.89207
Z020E0093	0.22669	0.685123	0.75768	12.5924	0.527668	0.805343	2.90061	23.3346	4.25875
Z020E0094	0.353517	1.3608	4.60972	4.27525	1.29337	5.90714	1.31719	22.9198	5.71048
Z020E0095	0.394668	1.13947	2.23631	2.69219	0.747562	1.09638	0.844331	8.15315	3.70912
Z020E0096	0.924099	1.14903	2.18447	3.9422	0.507943	0.872408	0.989756	12.4398	NA
Z020E0098	1.60121	0.698086	2.0288	4.26417	0.450124	2.17172	3.99599	15.3346	4.58931
Z020E0099	1.55406	1.06844	2.13222	19.1317	1.09749	10.0383	4.91927	43.5804	7.91606
Z020E0100	0.293512	0.864859	2.87097	4.01256	1.96188	1.40882	1.06117	12.9396	5.74193
Z020E0101	NA	0.808423	2.15574	22.6765	0.142309	10.3843	NA	47.9981	5.73976
Z020E0102	1.44281	1.0584	3.11962	6.86894	0.822091	2.1652	1.12839	17.3064	5.23622
Z020E0103	0.785798	1.93195	4.37164	8.68772	0.460978	17.3736	0.937947	35.4679	NA
Z020E0104	1.3123	1.41885	3.29014	17.7665	1.57065	5.85931	4.83512	36.8538	7.67746
Z020E0105	1.64828	1.66503	5.16852	12.5138	1.16018	13.9199	2.38235	41.7145	6.47374
Z020E0106	2.09635	0.341858	1.1841	16.6276	0.733463	1.92746	4.45616	26.6625	4.59174
Z020E0107	1.31453	1.11456	2.57379	19.8705	0.812991	10.3381	8.47853	45.481	7.09245
Z020E0108	0.467329	1.80405	3.74539	3.10146	1.21234	0.398733	1.16704	14.2857	4.23764
Z020E0109	0.433677	1.485	1.95468	8.17755	1.30685	11.908	1.24161	29.4971	7.48599
Z020E0110	0.26455	0.741499	0.67806	4.22906	1.54515	1.80676	1.54583	14.4721	3.24512
Z020E0111	1.49023	1.31741	1.26854	11.6628	1.38581	1.32364	4.08206	23.3855	7.52783
Z020E0112	0.58486	1.78377	4.36314	7.29264	0.910061	13.9257	2.31159	30.0328	8.04175
Z020E0113	1.57684	1.00265	2.63736	11.3283	0.726815	6.15229	2.34481	27.4649	5.30807
Z020E0114	1.09012	0.890687	3.83939	6.01011	0.545052	8.62653	1.11443	21.9523	5.08867
Z020E0115	1.03151	0.922439	0.979411	5.55806	0.904076	1.17292	3.19774	16.279	6.23857
Z020E0116	1.58966	1.22066	1.26416	16.022	0.772637	1.60785	4.04423	29.0315	5.04427
Z020E0118	0.162051	1.19104	5.31808	4.42047	0.624621	17.2209	0.70677	30.8152	8.14205
Z020E0119	0.151213	1.46394	2.60781	3.87254	0.851795	1.16078	1.43112	10.906	7.37406
Z020E0120	0.530174	0.67864	1.87871	16.1341	1.24664	9.93429	2.44315	32.6712	5.11199
Z020E0121	0.930527	0.771365	1.45992	6.56553	0.716939	2.68991	4.54698	17.3275	5.74537
Z020E0122	0.845436	1.13716	0.861789	3.39026	NA	-0.561027	3.24249	13.32	3.24066
Z020E0123	0.546123	1.58683	3.91449	4.05999	0.590313	1.45713	0.57594	11.2861	4.40638
Z020E0124	0.955313	1.21832	1.13911	19.2992	0.616299	1.5941	2.62057	26.268	4.22177
Z020E0125	0.186618	1.0378	3.32494	2.678	0.413515	5.81222	0.883308	17.1291	NA
Z020E0126	1.19076	0.993997	1.62851	3.7811	0.809642	1.38492	1.51166	13.0137	3.74765
Z020E0128	0.526301	1.5144	2.05084	2.24857	1.52871	0.642741	1.30305	9.54953	3.12669
Z020E0131	1.78022	1.23789	2.4862	3.76139	0.464125	1.10716	0.821623	11.8708	4.24246
Z020E0132	2.11696	2.73245	1.83295	8.85206	0.812443	8.73273	1.22026	31.2705	4.26257
Z020E0133	1.0027	0.67975	0.923551	13.2072	0.899081	7.19032	2.43038	25.0534	4.71378
Z020E0134	1.80827	0.709699	1.54605	13.9441	0.976168	1.8109	2.58092	21.966	4.1084
Z020E0135	0.376913	1.86986	3.61858	4.71606	1.14395	2.12085	0.811276	13.9149	5.56481
Z020E0136	0.346751	3.07847	5.07387	5.88989	1.08218	9.75328	0.950918	19.2247	NA
Z020E0137	0.345573	0.982131	4.71285	1.12212	0.26106	5.42641	0.673256	13.4525	4.97136
Z020E0138	1.54863	0.533554	1.55315	5.18898	0.471458	0.651498	3.03495	11.8466	4.13139
Z020E0139	0.536008	1.23221	2.0396	2.82439	0.442668	0.275869	0.965787	8.71795	3.243
Z020E0140	0.358208	1.31297	1.26402	5.70837	0.940061	1.68197	0.813382	11.741	3.94914
Z020E0141	0.807786	1.19087	1.97794	8.44579	0.698385	0.417827	1.58932	16.9255	4.24456
Z020E0142	0.240394	1.80591	1.52543	0.460235	0.498055	0.866344	0.255971	5.26103	3.04286
Z020E0144	0.616217	0.821224	1.50076	4.1149	1.50669	1.89426	3.7334	15.7055	4.58413
Z020E0145	0.130017	0.828276	2.6335	5.48722	0.611034	1.00387	0.760477	11.8353	4.24546
Z020E0146	0.389334	0.983578	3.61495	5.72325	1.20476	1.93041	1.23744	15.8045	3.74541
Z020E0147	0.536221	1.04551	2.47852	5.27917	0.489935	10.7301	0.772347	20.5519	6.15657
Z020E0148	1.13079	0.85726	0.748797	14.6681	0.338569	1.46644	1.70144	21.9134	5.24159
Z020E0149	0.328249	1.07257	1.71583	5.50695	0.50926	1.17371	0.821737	11.1347	4.24562
Z020E0150	1.71868	0.717656	1.66241	4.79851	0.411364	2.28883	2.6916	13.1784	4.16725
Z020E0151	1.1048	0.851098	1.17504	6.846	1.40913	1.2872	3.76154	19.2279	4.52761
Z020E0152	0.546747	0.661867	1.2344	4.03027	1.05684	1.26027	1.98003	9.45303	3.40379
Z020E0153	0.30962	2.179	3.26032	7.31834	0.588632	2.51609	0.923163	17.9452	4.64882
Z020E0155	1.00563	1.03346	3.70287	9.8765	1.05672	2.91849	2.63991	23.4034	6.24444
Z020E0156	0.560292	1.08093	2.78466	3.95493	0.872236	1.39488	0.832104	12.6928	4.42996
Z020E0157	1.09056	0.737383	1.09922	5.84762	1.65962	0.245643	5.28015	15.3941	5.06875
Z020E0158	0.276025	2.49745	4.35312	7.03664	2.54279	19.2684	0.866645	33.6897	8.05519
Z020E0160	1.29294	0.834951	1.47447	6.5522	0.522027	1.42821	4.58662	16.2547	4.24545
Z020E0161	0.0397428	0.832673	2.34074	2.06628	1.45515	1.53195	0.390819	6.70836	2.80378
Z020E0162	0.603408	1.16965	1.59038	4.30877	0.2781	1.49723	0.73324	10.4848	4.47539
Z020E0163	1.43467	1.3939	0.740101	10.0606	1.18133	0.307582	2.80349	18.1254	4.24546
Z020E0164	2.40269	0.799682	1.93823	23.1774	1.45493	1.87356	3.89127	38.2702	5.58748
Z020E0165	1.10821	0.762256	2.15829	6.25748	0.514791	3.65472	2.35295	17.078	3.75055
Z020E0167	0.757789	0.755779	1.21517	11.6277	0.402486	1.14629	2.22436	17.8967	4.24609
Z020E0168	1.30505	1.18845	1.15635	30.4578	0.979352	1.30443	3.44914	41.5884	7.57624
Z020E0169	1.28372	0.957007	1.27837	19.7445	1.81657	1.33549	3.76291	31.6769	5.72943
Z020E0170	1.15869	1.12794	1.25923	5.10847	1.62369	0.927312	5.513	15.2542	5.9355
Z020E0171	0.154156	1.44438	2.28452	3.02507	2.3258	2.35578	2.92289	15.0041	4.04995
Z020E0172	0.666296	1.63494	3.44862	2.96722	1.04732	4.36628	1.35323	16.257	4.74105
Z020E0173	0.858589	0.694402	1.48226	4.12241	0.767246	1.87044	2.81839	11.9842	4.0879
Z020E0175	0.253418	0.357799	1.46907	2.85085	0.844934	1.04162	1.76825	6.89435	2.64717
Z020E0176	0.647731	1.08813	2.75057	10.5188	1.67926	5.2584	2.13628	25.6086	5.03156
Z020E0179	0.00763391	1.10215	3.2889	4.7298	1.19609	1.72399	1.55017	16.9132	4.72909
Z020E0180	0.318434	1.74884	4.06149	2.92985	0.912203	1.03192	0.812053	11.8669	4.35852
Z020E0181	1.20539	0.972154	3.20545	15.841	1.02681	5.49299	2.5511	31.6133	NA
Z020E0182	0.389601	0.603799	1.79577	4.87224	0.698349	3.06396	3.91927	15.5872	4.24154
Z020E0185	0.849623	0.430604	0.38016	8.07521	1.47338	0.126543	2.18118	7.26851	4.25363
Z020E0186	0.478954	0.658142	2.26873	2.94874	1.41035	1.06771	0.862916	8.85128	4.81496
Z020E0187	0.619933	1.14414	3.03127	1.90233	0.346472	5.80842	1.12244	13.1605	6.54531
Z020E0188	0.189447	0.335814	0.95037	5.47235	0.332531	1.53056	1.7418	13.0489	3.24536
Z020E0189	0.71287	2.24891	2.07667	8.31035	0.82657	13.9118	1.36552	30.6676	NA
Z020E0190	2.37183	2.56114	3.75417	14.9289	2.04153	10.5691	2.25577	37.5266	6.43766
Z020E0191	0.0358989	0.560034	2.23885	1.63172	1.36628	2.34938	0.677584	11.8415	4.24217
Z020E0192	2.12672	1.07847	1.6946	15.4226	0.864992	2.08318	5.31563	30.8112	5.57856
Z020E0194	0.619761	0.676832	1.08126	9.893	0.682834	0.74619	1.54755	16.5241	4.16867
Z020E0195	0.345557	1.11157	2.58492	6.38037	1.54877	3.11696	2.4725	17.3406	4.58618
Z020E0196	0.157254	NA	1.89795	1.56201	1.08307	0.807744	2.2048	10.4007	4.55854
Z020E0197	1.35765	1.09371	2.43429	22.9267	0.633081	9.02935	4.58841	42.2233	7.67185
Z020E0198	0.729314	0.941182	1.43486	23.193	0.510713	2.14558	3.65352	33.9734	6.62999
Z020E0199	1.38075	0.886259	1.18775	10.5401	0.971062	2.38464	2.4877	19.1742	5.25253
Z020E0200	1.68852	1.58799	0.923357	8.49753	0.542565	0.569021	3.44603	17.2858	5.1539
Z020E0232	1.87628	3.177	1.76386	4.28732	2.43765	4.01411	2.01311	18.8109	2.23095
Z020E0234	0.279349	1.79852	3.19705	2.95799	2.35568	4.59494	0.937075	16.1949	6.239
Z021E0002	3.18391	1.05659	2.06286	15.2246	3.05289	6.95971	10.9814	42.0799	7.09431
Z021E0003	2.56788	0.499947	0.948118	10.7554	1.73935	5.21028	6.48691	29.4518	6.09242
Z021E0004	0.320934	1.76883	2.30365	14.6637	0.926416	9.02022	9.84866	38.8449	7.59401
Z021E0005	3.13919	1.45867	1.25842	18.6655	0.306388	5.92239	3.35727	32.8616	6.30243
Z021E0007	2.93055	0.989277	2.48814	16.9286	1.19787	10.6227	6.48237	40.3758	7.09581
Z021E0008	2.13739	0.85943	1.40086	14.3662	2.86805	8.43083	7.23318	37.9008	7.59585
Z021E0009	2.10971	1.04242	3.33649	14.0947	0.459424	9.01841	12.4138	41.9677	7.0037
Z021E0010	NA	1.22206	1.34145	13.0737	0.562945	4.62268	4.65401	29.9172	4.59267
Z021E0011	2.60116	0.629651	1.19942	11.191	0.149375	6.94692	4.40051	26.5441	6.35204
Z021E0012	0.285257	0.46829	1.85876	16.0658	0.235022	7.8757	5.01275	32.5949	5.58877
Z021E0013	3.855	1.40915	1.31612	12.6339	0.00517779	8.29884	6.73742	34.455	6.09172
Z021E0014	NA	1.52839	2.38845	9.62898	1.55342	10.344	7.5698	38.8786	NA
Z021E0015	3.05843	1.20559	1.37051	10.5267	0.352027	4.27552	4.49512	25.8754	4.59198
Z021E0016	1.20662	1.28007	1.97327	13.9279	0.465513	8.0138	2.67599	27.4173	5.59177
Z021E0017	1.5499	0.574384	2.41888	11.9516	0.448779	8.83359	7.46732	32.0413	5.59394
Z021E0019	NA	1.77603	1.90616	12.4044	0.530791	8.13682	8.53273	38.1765	7.09431
Z021E0020	NA	1.77151	2.03396	12.4648	0.176481	7.10626	3.00292	33.2769	5.59019
Z021E0022	0.658377	1.74255	2.04918	10.7451	0.865106	8.14323	6.77967	30.2342	5.58947
Z021E0023	2.10255	1.18831	1.89437	19.0567	0.715759	6.96087	4.41114	34.2977	7.09167
Z021E0024	2.37576	1.20683	2.24759	9.73056	0.160576	6.4216	6.35475	27.3487	4.83473
Z021E0025	2.07615	2.00132	3.24587	8.30215	2.72785	8.76435	5.90324	32.47	5.54504
Z021E0026	1.64506	2.61414	1.44428	15.0903	1.53649	7.15364	5.50862	36.9847	5.30741
Z021E0027	3.01927	1.12646	2.33621	11.7086	0.381735	7.69031	NA	36.0695	6.52393
Z021E0028	2.17236	2.16823	2.06338	18.1878	0.851396	10.5041	7.01371	43.5934	7.03377
Z021E0029	2.69171	1.76274	3.2298	7.72972	1.31049	7.01462	5.9375	30.1085	6.59079
Z021E0030	3.15559	1.81892	1.59526	20.8511	2.65575	9.79108	6.15088	45.6112	4.59877
Z021E0031	3.87689	1.50245	1.34318	21.2312	0.105053	8.95845	5.40997	40.7724	7.52871
Z021E0032	-0.737902	-0.0346623	1.67421	17.4788	-0.217969	7.4557	4.82632	29.949	5.59159
Z021E0033	2.44407	2.49419	3.29965	14.4069	1.56012	8.02396	4.05456	35.1662	6.07808
Z021E0034	1.84556	0.898615	1.71123	7.89705	0.370104	5.29797	5.50063	23.0711	4.82995
Z021E0035	3.14016	1.94518	3.73908	15.7203	0.205503	11.4677	4.2945	39.5345	7.09942
Z021E0037	2.29355	1.58308	1.89762	10.9268	1.5231	7.84337	7.94407	35.2896	5.8264
Z021E0038	NA	1.10336	2.58432	11.9354	0.851135	6.48866	9.7283	38.4701	6.09432
Z021E0039	2.33258	2.27239	3.04068	19.294	2.05834	16.6273	4.70233	50.6314	NA
Z021E0040	1.51806	1.09934	1.16176	10.219	0.196357	6.59509	3.45734	23.0802	7.08859
Z021E0042	2.42893	2.21312	1.58288	12.8499	0.894582	8.42404	10.6779	38.1805	6.59162
Z021E0043	3.17457	1.66708	2.41124	11.687	0.850043	8.59205	11.5712	40.4662	8.23838
Z021E0044	NA	2.19546	3.52961	14.2085	1.76888	9.13412	9.36456	46.0394	7.59836
Z021E0045	1.79732	1.72134	1.35072	15.189	0.135405	9.3683	1.67121	28.7689	6.52932
Z021E0046	2.57859	1.62337	1.6913	14.3085	1.64208	8.39276	9.27808	41.8582	6.59144
Z021E0047	2.30184	1.08802	1.10453	11.8934	0.297835	4.98359	4.27083	27.5759	4.59832
Z021E0048	1.51247	1.52336	2.487	13.4619	0.965337	7.85683	5.05999	33.1695	7.09183
Z021E0049	0.894659	1.21067	2.11535	15.9154	0.27178	8.8825	2.5487	31.353	7.0916
Z021E0051	1.22501	0.562222	1.0286	11.4857	-0.0959709	3.19617	4.78389	20.042	4.58603
Z021E0052	0.836841	0.619328	2.30223	11.6956	0.37128	7.3739	9.43446	32.729	5.59151
Z021E0053	1.27409	0.618101	2.29096	18.9824	0.582947	8.40582	6.19433	36.4087	6.09153
Z021E0054	-0.156523	0.366993	2.16708	14.1307	-0.00997052	11.1944	3.51817	28.4377	5.5898
Z021E0055	2.01699	0.691475	1.002	12.5411	0.114615	4.78192	1.48428	21.5628	4.59444
Z021E0056	1.14783	1.19081	1.88915	9.84597	0.444641	7.17785	6.5533	29.569	5.87717
Z021E0057	3.03392	1.52838	2.79133	20.113	2.05399	10.3658	7.02708	47.1047	6.30489
Z021E0058	-0.989437	0.23128	2.34271	9.75765	0.287149	9.91904	6.75848	26.4328	5.61453
Z021E0059	1.54054	1.61574	2.95263	12.9135	0.65598	10.5111	2.29947	34.2062	6.31002
Z021E0060	2.4196	1.34445	1.73364	17.0103	1.05986	8.87916	5.97299	41.069	7.02163
Z021E0061	2.06484	1.28563	2.21826	18.8468	0.784797	9.82611	4.4438	41.7097	6.60959
Z021E0062	2.12223	0.88951	1.58227	19.8187	0.415543	7.24785	3.0225	36.9444	5.0781
Z021E0064	NA	1.48339	2.36719	9.18939	0.456584	6.67431	6.64952	31.5035	4.57967
Z021E0065	0.943008	0.627484	0.829081	10.9135	0.260704	3.05597	5.09651	22.7042	4.59363
Z021E0066	1.31873	0.695811	1.82612	11.9092	1.41642	5.2184	7.98698	31.3184	5.08904
Z021E0067	3.84707	0.765187	1.49745	14.0402	0.426445	8.17489	2.69308	35.7658	5.58994
Z021E0069	1.51595	1.1432	1.72137	20.3205	2.23487	8.08976	7.44703	42.0001	NA
Z021E0070	2.15832	1.23514	1.10205	17.8026	0.332783	5.87892	1.6058	30.4861	5.59162
Z021E0071	1.66473	2.11535	1.65424	17.65	2.41673	14.989	7.58827	47.1963	NA
Z021E0072	-0.378411	0.191953	1.67915	18.3831	-0.12769	8.74087	6.76955	33.0894	4.58974
Z021E0073	-0.849946	0.66744	2.00418	13.2816	0.329082	12.1172	10.7457	40.9405	6.52001
Z021E0074	2.84287	1.11643	1.07049	12.69	0.375328	6.13875	3.78101	28.6866	5.03468
Z021E0075	1.14717	-0.0264236	0.89213	12.4728	0.331057	4.91749	3.79927	23.6207	6.08039
Z021E0076	1.93908	1.35962	1.32303	14.2697	0.316615	6.73118	5.12729	30.9301	5.59136
Z021E0077	-0.0554919	1.36374	1.71605	12.6983	1.07216	9.14921	8.9929	36.1176	6.28772
Z021E0078	2.4318	1.70318	3.11572	10.6105	1.38806	9.14844	NA	43.4773	7.88143
Z021E0079	2.42633	1.32072	1.94778	14.0496	0.502935	8.58564	3.07465	31.5972	5.57385
Z021E0080	2.86549	0.403711	1.00209	18.93	0.475941	7.03845	4.51905	33.8093	6.07485
Z021E0081	2.81337	1.30953	2.23873	11.0299	1.51424	10.7607	9.05491	41.4851	6.03387
Z021E0082	2.04293	1.08612	1.47144	17.3995	0.518455	12.0851	5.1334	38.1356	7.58974
Z021E0083	NA	0.450693	1.52021	21.0927	0.941254	7.42407	7.97315	45.2163	6.58961
Z021E0084	3.62583	0.238249	0.656209	11.3201	0.507333	4.49517	3.35484	23.8638	4.59001
Z021E0085	3.01665	1.6589	2.21861	20.5915	0.38458	9.44963	5.18006	42.1641	6.35413
Z021E0086	NA	0.458163	1.18903	17.6908	1.70873	11.4162	5.7804	50.5945	NA
Z021E0087	2.30479	2.32454	1.25099	15.7409	2.96075	7.35536	11.5841	44.2873	NA
Z021E0088	NA	1.3348	1.22042	10.0472	0.128795	4.35149	5.88256	28.0165	6.59167
Z021E0089	1.75508	0.609115	1.3914	10.7048	0.220657	5.52216	4.8814	26.7168	4.58578
Z021E0090	1.33984	0.242014	0.0128146	18.3721	0.0644694	6.53657	1.52621	27.2959	5.09817
Z021E0091	1.92065	0.510056	1.86496	7.47947	0.139318	4.09341	5.60049	20.1936	4.83906
Z021E0092	2.73741	1.36895	3.07698	14.2731	0.779096	10.9792	8.65269	42.0544	6.0917
Z021E0093	1.11761	0.326117	0.673189	13.1254	0.0811698	4.20935	2.81039	21.9104	5.14148
Z021E0094	3.43952	0.937731	1.31122	13.1327	0.604872	6.72007	6.58242	33.4882	6.59391
Z021E0096	2.78099	1.72762	2.16721	10.6151	1.97967	8.99097	11.8746	40.632	6.58206
Z021E0097	0.833327	0.945918	1.21458	11.5405	0.191628	9.00992	1.32377	25.6703	6.08448
Z021E0098	2.39975	0.859646	1.43397	15.2701	0.699381	6.61338	7.27733	33.1275	6.70112
Z021E0100	2.8366	1.46791	2.87102	16.2793	2.67715	9.55429	8.37348	44.0135	6.32006
Z021E0101	-0.0617451	0.638052	1.78266	12.619	-0.00724201	6.92078	5.64082	28.4919	4.59142
Z021E0102	-0.421023	0.644565	1.85814	18.8108	0.956407	13.5424	2.70029	37.0771	5.59224
Z021E0103	2.7728	2.0653	3.38079	16.9148	1.44101	12.1755	6.09252	45.9424	7.09071
Z021E0104	0.114135	1.22738	1.70021	17.5421	1.9226	10.2239	5.58233	39.1783	6.59886
Z021E0105	2.04025	1.25039	3.13741	12.49	0.526881	9.74111	3.3283	34.1898	NA
Z021E0106	3.15323	1.66272	2.00322	8.20743	1.60312	5.75797	5.09497	26.1469	4.58274
Z021E0107	1.095	0.934963	1.33934	18.898	0.976122	7.65638	5.14736	36.7792	6.59162
Z021E0108	2.24401	0.355464	1.02871	10.9911	0.261562	5.84374	5.01039	27.3951	4.88321
Z021E0110	2.15543	0.957523	2.50013	8.30058	1.49187	9.69844	12.1886	38.7807	NA
Z021E0111	1.71142	0.95759	1.7632	11.9041	1.26482	7.62963	9.29967	35.334	7.03327
Z021E0112	0.262365	0.764273	1.62244	11.9274	1.1066	9.2746	4.52417	30.0774	6.0917
Z021E0113	1.0471	1.04047	1.33837	11.3447	1.10973	7.60465	5.29376	30.149	5.58748
Z021E0114	3.35861	1.63794	1.38668	12.0707	NA	10.5433	8.48235	39.7185	NA
Z021E0115	2.36613	0.518348	1.44827	15.721	0.131989	8.50745	2.47788	31.6981	5.59162
Z021E0116	2.2072	1.00297	1.82254	12.2849	0.468561	7.44582	2.16926	26.9665	5.59331
Z021E0118	1.37903	1.33947	2.16597	16.4587	0.922638	8.65319	7.56537	40.7923	NA
Z021E0119	2.50439	1.82766	2.29976	16.5435	2.10847	7.93389	9.4242	42.8197	7.07503
Z021E0120	2.19204	1.48076	0.859386	15.8093	0.510662	4.45453	1.75983	25.7099	5.57184
Z021E0121	NA	1.60381	2.30657	17.8056	1.53264	7.32608	8.71591	44.0071	NA
Z021E0123	2.9856	0.892329	1.35626	20.2718	0.6759	8.64182	6.48201	42.461	6.07257
Z021E0124	2.78606	0.928701	2.03066	8.7975	0.474951	5.41461	5.99013	26.5938	6.59292
Z021E0125	1.95294	0.851404	0.390662	14.2507	0.245803	5.55221	1.5804	24.543	5.52649
Z021E0126	2.43254	0.764794	0.957507	14.2154	0.0843534	6.00838	1.62727	25.9336	4.87572
Z021E0127	0.823123	0.631447	1.7885	9.67239	0.173975	15.1017	5.05698	30.564	6.08226
Z021E0128	2.25603	1.45471	2.36026	18.9367	1.56178	11.9134	7.17897	44.2861	7.58394
Z021E0129	2.77252	1.23937	1.63899	11.5489	0.729809	9.75522	6.78916	36.3064	7.05195
Z021E0130	3.06982	0.783679	0.905518	16.4082	0.766142	6.30898	3.81507	32.7607	4.58174
Z021E0131	2.86742	1.12098	3.2839	18.7127	1.83485	10.0137	11.1815	47.2741	7.36347
Z021E0133	NA	2.18772	1.52728	11.5697	0.11028	6.26289	7.8523	34.089	6.09166
Z021E0134	3.35309	1.45719	1.14536	12.8248	1.16811	8.11594	9.36969	38.2262	6.59154
Z021E0135	3.05885	1.8582	1.59486	12.5731	1.07388	9.15231	5.46321	34.7626	5.85667
Z021E0136	1.47169	1.00071	2.02052	9.36247	0.418788	8.49613	7.67472	30.0331	5.35521
Z021E0137	3.07207	2.3196	2.20641	18.9966	2.48764	11.9205	7.30738	49.0241	6.25745
Z021E0138	NA	NA	3.95982	12.7349	0.936601	12.228	11.7088	47.3451	7.5861
Z021E0139	2.32631	1.14703	2.17808	12.4369	1.7604	9.00743	10.8653	37.5843	7.01159
Z021E0140	1.79444	0.90074	1.40982	12.8838	0.643165	5.81638	1.98931	26.2732	5.09347
Z021E0141	1.38896	1.16078	1.54717	13.1221	0.224736	5.52207	2.09696	25.8129	4.59621
Z021E0144	2.02914	1.3541	2.2186	13.9811	0.263502	9.3112	5.72422	39.291	6.85994
Z021E0148	2.41204	1.65065	0.981238	20.0016	1.38392	8.93903	4.25953	39.8053	6.59258
Z021E0149	2.36012	0.947327	2.10844	10.9755	2.38767	7.40862	9.00591	36.1242	6.5916
Z021E0150	2.34374	1.74823	2.56644	19.4247	1.16775	13.0422	7.84787	45.7101	7.58354
Z021E0151	1.95175	1.88339	1.62604	15.403	0.548895	8.73851	1.80054	32.733	5.85488
Z021E0152	2.83468	1.26684	2.89559	12.7672	1.37746	13.3894	NA	53.3582	NA
Z021E0153	3.93908	2.53461	2.95024	15.5461	0.900199	7.682	2.93033	36.1553	6.58961
Z021E0154	3.28949	1.657	1.81413	15.0757	0.387229	6.89304	10.6198	40.2182	NA
Z021E0156	4.0162	1.74543	1.44339	14.486	2.58644	13.2498	9.68704	49.0489	7.08186
Z021E0157	NA	2.37453	1.79355	14.4443	0.169862	7.89919	6.14863	36.4801	6.09168
Z021E0158	2.81175	1.8855	1.95793	11.1841	0.678108	7.82144	10.6307	37.648	5.08094
Z021E0159	1.70174	1.19966	2.38867	11.6337	0.89763	9.99616	2.10412	28.2218	6.5914
Z021E0160	NA	2.1403	1.38755	12.9376	NA	9.32338	11.1503	43.379	7.59454
Z021E0161	0.849969	0.601415	1.34227	18.0904	0.623269	10.3774	8.51503	39.9494	6.59161
Z021E0162	1.6922	1.1244	2.65326	8.89263	0.334144	9.2478	6.18081	30.9374	5.6026
Z021E0163	1.9253	0.636505	3.13386	11.9911	0.156541	8.7746	6.81875	32.3277	5.38311
Z021E0164	NA	0.524419	1.22098	14.446	0.208076	6.32991	1.88103	29.3869	4.58086
Z021E0166	1.12775	0.665826	1.01539	14.8302	0.260161	4.27783	1.78546	19.8143	4.54716
Z021E0167	2.11975	1.62893	1.57027	19.0406	0.650096	7.47493	5.3208	38.0571	6.37383
Z021E0168	NA	1.02973	1.05055	11.9363	2.5433	4.84916	8.91445	40.8902	NA
Z021E0169	2.04754	1.49959	1.6631	17.2886	0.505726	7.31744	4.19869	37.3043	NA
Z021E0170	-0.249804	0.428426	2.35587	23.8918	-0.06311	11.4115	4.82151	42.7023	NA
Z021E0172	2.00595	1.38891	1.69331	13.2852	0.235335	5.28737	3.29253	27.274	5.57851
Z021E0173	NA	0.989834	1.85878	10.7497	0.145971	10.4315	7.11762	36.8907	6.58736
Z021E0174	1.16638	0.81298	1.96752	14.5885	0.118212	10.7759	8.56002	37.0483	6.5717
Z021E0175	3.09083	1.48754	1.98469	17.2922	0.361727	10.3948	7.52494	44.1122	6.8006
Z021E0176	2.11847	1.04508	1.36541	14.8621	0.265022	7.01334	2.11757	27.1547	5.85005
Z021E0177	1.42347	0.875543	2.53485	13.8181	0.142805	8.81109	1.74794	30.0544	5.59001
Z021E0178	2.86552	0.698582	1.44149	11.3088	0.747864	4.30965	2.58633	26.136	5.59151
Z021E0179	2.78435	0.870418	2.05222	11.3703	0.418915	4.45561	5.36401	27.1619	4.59139
Z021E0180	1.85941	1.33755	1.95293	17.5776	0.299626	9.51425	4.13661	36.7462	6.65677
Z021E0181	0.0264092	1.65675	1.42861	13.9565	0.470441	4.36921	4.95005	27.3165	7.09461
Z021E0182	3.487	1.64265	2.37638	15.5289	0.197218	10.9514	3.13347	41.4935	6.60545
Z021E0184	NA	1.90482	1.13408	11.004	0.847259	5.31059	7.9345	32.4118	7.58747
Z021E0185	2.85174	0.914358	1.24529	16.9618	0.0829821	8.58882	2.68398	33.6795	5.13687
Z021E0186	-0.130997	0.850229	1.82704	8.12446	0.888218	6.35448	5.36118	23.9229	5.58039
Z021E0187	1.50778	1.01838	2.1901	21.7945	0.675874	9.83431	9.28788	46.4677	7.15231
Z021E0188	1.35985	1.10989	2.62986	12.0092	1.8875	8.46372	10.5565	39.0715	7.33854
Z021E0189	1.85406	1.09208	1.3633	7.95642	0.903288	4.64103	4.75314	19.6319	4.5969
Z021E0190	1.50192	0.907712	2.65814	10.6655	0.42467	7.04988	1.60229	25.4505	5.59171
Z021E0191	2.79778	1.17229	1.24784	12.6541	0.0536526	5.56807	2.28884	25.1027	5.1463
Z021E0192	2.19438	0.648556	1.22616	17.174	0.398197	5.8646	3.44184	31.2934	4.33797
Z021E0193	1.33376	1.44708	1.42903	15.1497	0.187949	4.99238	2.69195	28.0841	4.59161
Z021E0194	3.48447	1.27801	1.13916	14.2029	0.286716	4.24554	2.91347	26.7868	5.5936
Z021E0195	0.127724	0.773919	1.94378	13.9245	2.28565	11.9371	8.30035	40.0293	5.0889
Z021E0196	2.94171	1.647	1.90335	16.9118	1.48147	10.1387	9.28846	42.8738	7.02947
Z021E0197	NA	1.08354	2.38303	12.9849	1.15027	5.01187	9.97277	35.5397	6.09142
Z021E0198	1.68023	0.917108	2.04137	11.1701	0.194281	7.81474	6.24018	34.4506	6.30722
Z021E0199	2.71785	1.7346	1.40707	13.8411	0.498949	7.23481	6.02298	35.0225	6.08976
Z021E0200	1.80217	0.992412	0.987043	16.5926	0.278464	8.61907	3.38029	35.4873	5.35942
Z021E0205	3.27296	0.362146	0.697788	15.7784	0.617825	5.53034	4.46012	29.2032	6.05487
Z021E0216	2.71245	0.97758	1.76968	12.9579	0.654917	5.82357	4.33128	28.7344	4.87744
Z021E0235	2.04984	1.69833	2.09626	13.8897	1.46409	9.04195	11.8805	42.7236	7.58543
Z021E0241	2.69575	1.32539	2.24411	9.06003	0.665373	9.59568	7.38313	34.2639	6.3201
Z023E0001	2.04584	1.35342	1.90039	15.872	1.67882	9.90985	3.94375	39.7021	6.35607
Z023E0003	1.43447	0.936609	1.66437	20.1424	0.937116	9.06229	4.32581	39.4654	6.63682
Z023E0004	1.43601	1.47316	1.58644	13.4976	1.36451	8.49954	3.52938	32.8945	5.70931
Z023E0006	0.605406	0.875244	1.06786	12.366	0.713448	7.91063	1.44704	28.6318	5.94149
Z023E0008	1.07787	0.711312	1.33301	19.3603	0.804024	6.37854	4.33204	33.2507	NA
Z023E0009	1.43564	1.01234	0.88046	12.2489	1.50136	6.60578	1.66664	24.6373	5.90029
Z023E0010	0.873413	0.919935	1.15426	11.1343	0.633731	5.35737	2.00098	24.2282	5.43553
Z023E0011	2.00739	0.905162	1.04371	16.2716	1.79548	12.5058	3.34612	36.9443	6.43332
Z023E0012	2.85338	1.36087	1.91693	14.0862	0.941771	11.0103	5.30551	37.9422	NA
Z023E0013	0.621233	0.979141	2.35375	14.4678	0.68801	6.77989	5.54857	33.1948	5.83541
Z023E0014	0.917256	1.0051	1.06256	10.2869	0.706515	8.28715	1.34755	25.0786	6.94477
Z023E0015	0.492837	0.530014	0.692123	5.96398	0.28223	4.72644	0.644061	13.2604	4.65254
Z023E0016	0.748025	0.913357	1.08659	9.46126	0.593595	5.62589	1.23224	19.6848	6.43548
Z023E0018	0.852453	0.941652	1.74483	13.4931	0.314118	9.498	2.22369	29.8468	6.19217
Z023E0019	0.716594	0.711819	0.899921	10.9415	0.428474	8.13766	1.00816	23.1192	5.35622
Z023E0020	1.9119	0.688675	0.992854	12.1278	0.31661	5.26575	3.02096	22.9253	5.36054
Z023E0021	1.54489	1.31284	2.66243	14.956	1.02221	11.0784	1.65093	37.3997	NA
Z023E0023	1.05819	0.74138	0.817807	11.3002	0.391895	5.19166	1.35802	20.4519	5.32938
Z023E0024	1.00801	0.88151	1.25906	8.44495	0.74726	5.60735	1.81992	19.2673	3.93531
Z023E0025	1.41384	0.917475	1.36698	14.9211	0.613517	6.77742	2.56721	27.4264	5.93902
Z023E0026	1.46192	1.60287	1.68754	11.8828	0.498486	9.51779	2.00418	30.473	7.38474
Z023E0027	1.2811	0.800006	1.67559	12.4625	0.543655	8.10189	2.91736	24.8988	6.44339
Z023E0028	1.77778	1.40071	2.55437	17.9096	1.3463	12.2625	3.32684	42.3895	6.608
Z023E0029	1.11472	0.996331	1.14334	10.1732	0.681795	6.96269	1.23718	23.4465	5.49047
Z023E0030	1.14843	0.703593	0.963624	12.7128	0.930709	6.30955	1.81318	27.0945	5.27542
Z023E0031	0.842601	0.712641	1.35734	9.71048	0.419346	4.32382	2.09066	20.4849	5.93528
Z023E0032	0.702056	0.493291	0.77189	7.80817	0.272454	6.02066	0.869277	15.7883	4.44282
Z023E0034	0.913566	1.07235	1.51402	10.8225	0.327018	9.42752	1.99711	26.1472	5.84461
Z023E0035	1.241	0.881921	1.1189	9.42863	0.566711	5.64481	1.56982	20.6152	5.52207
Z023E0036	0.843065	0.690839	0.640779	8.18928	0.443201	4.86352	1.40985	18.4428	5.48318
Z023E0038	0.949535	0.904415	1.37276	11.4701	0.636778	6.56185	2.79399	26.0626	5.94143
Z023E0039	1.22769	0.878156	1.50109	18.4347	1.0551	7.08743	1.29651	34.2056	5.71587
Z023E0040	1.61201	1.31997	1.42863	16.7283	0.363773	6.65886	3.25565	32.8384	5.82076
Z023E0041	1.0703	0.926394	1.4566	12.0577	0.478108	6.11959	3.35638	27.5751	6.12977
Z023E0042	1.10939	0.652692	1.72562	12.536	0.224047	8.06182	2.10733	29.9835	6.12765
Z023E0043	2.14251	0.96076	0.880928	16.2233	0.602288	8.72161	1.76507	29.8816	5.93869
Z023E0044	1.74664	0.921938	1.08473	16.9062	1.02855	8.78594	3.8429	33.009	6.60222
Z023E0045	1.13713	0.427795	0.793952	13.6805	0.324066	5.03071	1.49062	22.6579	6.34719
Z023E0048	1.83763	1.30489	1.00082	16.3997	0.625389	10.6658	1.87144	34.9576	5.93764
Z023E0049	0.747047	0.902062	1.33287	13.5516	0.631289	5.80003	2.70143	28.5054	5.94812
Z023E0050	1.4042	2.14998	3.00667	12.2521	1.62312	10.1387	NA	36.4182	7.90168
Z023E0051	2.24098	1.18742	1.72712	14.8425	1.81718	11.2075	5.05084	36.8215	3.94088
Z023E0052	0.931447	0.902502	1.15375	14.7846	0.624097	6.716	2.43201	30.0293	6.94203
Z023E0053	1.03849	0.960516	0.883592	13.566	0.178399	9.21919	1.40083	26.6357	5.35846
Z023E0054	0.925388	0.715324	1.45696	11.9589	0.413392	6.2715	2.6046	24.6373	4.45215
Z023E0055	0.67286	1.0811	0.924509	15.1054	0.388929	7.84841	1.79397	28.3251	6.36054
Z023E0056	0.849635	0.702787	0.889637	6.64082	0.538666	2.25681	1.3826	16.3926	5.93544
Z023E0057	0.99071	0.70163	1.20229	12.7319	0.666443	5.8576	2.08981	24.0539	5.93359
Z023E0059	1.47339	0.776606	1.37272	16.7414	0.877214	9.08415	2.74841	34.1008	5.63796
Z023E0060	1.11055	0.624769	1.24094	15.624	0.265729	8.34785	3.50838	32.3132	6.38005
Z023E0062	0.870638	0.816462	1.01423	10.9469	0.514628	6.85741	2.0703	26.0915	6.92411
Z023E0063	1.37432	1.26168	1.92033	13.6939	0.773883	11.4816	2.78432	35.7035	6.93923
Z023E0064	1.1229	0.735931	1.79439	10.6207	0.628781	5.15055	3.07735	23.909	5.6646
Z023E0065	1.20524	1.21043	1.35564	13.6061	0.626641	10.0019	1.2647	28.5817	4.89615
Z023E0068	1.81922	1.78478	1.40653	13.2267	0.896044	7.42414	2.43636	31.3031	5.44315
Z023E0069	1.14452	0.999222	1.35874	10.9168	-0.0152783	7.26242	3.89035	25.6065	4.89277
Z023E0070	1.2738	1.02186	1.34619	15.1279	0.799667	10.4702	2.79903	33.4315	6.38071
Z023E0071	0.580147	0.762002	1.03461	8.67923	0.352148	6.04855	1.00728	19.1474	4.86436
Z023E0072	0.594757	0.687822	0.853132	13.4983	0.76309	7.12186	1.35231	26.7972	6.16425
Z023E0075	1.54177	0.655454	1.55342	17.4968	1.02674	5.98317	5.48594	34.1612	5.55226
Z023E0076	1.80444	0.900614	1.17309	18.6239	1.20705	6.73765	3.47863	36.0207	4.8724
Z023E0077	0.755205	-0.404029	0.3419	6.07511	0.928016	3.20801	0.701321	12.845	4.84583
Z023E0078	0.916618	0.735035	1.66139	13.2501	0.549555	8.37391	2.59508	27.6091	NA
Z023E0080	0.303465	-0.117711	0.719046	8.21963	0.375708	5.39501	0.646748	16.1517	4.8762
Z023E0081	0.884918	0.88856	1.2463	11.5308	0.611661	6.4156	2.69316	27.1505	4.93901
Z023E0082	1.48435	0.897759	1.04792	10.8245	0.735946	6.70689	1.39611	19.7581	5.94568
Z023E0083	1.06105	1.33404	2.09801	16.1656	0.513163	6.87393	NA	33.1518	7.35507
Z023E0084	1.25139	0.839133	1.05319	12.8213	0.563405	5.40171	1.65737	23.6037	4.94148
Z023E0085	0.767261	0.872668	1.68289	10.3081	0.6085	6.84589	2.6496	27.295	6.94372
Z023E0087	1.08558	0.626746	1.3213	11.7472	1.01097	7.12099	2.32335	22.8736	4.84992
Z023E0088	1.77685	1.26833	2.18086	11.1609	0.522419	4.86637	3.41279	28.3132	5.93742
Z023E0089	1.28228	0.865485	1.54878	17.486	0.708362	11.9419	3.57403	37.0382	NA
Z023E0090	2.28566	1.06466	2.86304	10.2874	1.24917	4.43812	1.42039	25.441	6.43312
Z023E0091	1.66169	1.49232	1.12132	14.7144	0.742047	10.2143	2.42928	34.2585	5.94078
Z023E0092	1.1092	0.121813	0.572379	10.0193	0.820731	5.03412	1.19818	19.1095	4.85694
Z023E0093	0.856608	1.53822	1.60381	16.5213	0.163827	10.1124	3.76436	35.38	6.38332
Z023E0094	1.02558	0.994785	1.47901	20.1739	0.907315	8.88237	4.41651	38.1932	6.33215
Z023E0095	0.872426	0.447137	1.05863	13.1904	0.317089	7.42065	2.95197	27.2978	4.85345
Z023E0096	2.02058	1.72743	2.02672	16.7124	2.34135	9.22182	3.62228	37.348	5.54336
Z023E0097	0.897873	0.881003	0.60084	7.19558	0.655466	5.62349	1.3454	18.497	4.94719
Z023E0098	0.628513	0.926015	1.26616	10.6986	0.368796	9.62661	1.13301	24.6731	4.90973
Z023E0099	0.562976	0.785853	0.649738	11.8266	0.24429	10.0775	0.664524	24.4309	4.86068
Z023E0100	2.07716	0.872208	1.41098	12.7581	0.610522	11.3747	3.27238	31.1183	6.93901
Z023E0101	0.806742	0.87343	0.863363	7.74674	0.463881	7.4194	1.04904	18.9899	5.6433
Z023E0102	1.17635	1.16031	1.39378	13.78	0.708007	9.43619	2.34166	28.078	6.65975
Z023E0103	0.952643	0.754395	0.953484	16.0272	0.796269	7.27036	3.14922	32.1333	NA
Z023E0104	1.03287	0.484294	0.586491	10.17	0.346962	4.32024	0.909516	19.0866	4.67989
Z023E0105	1.34666	0.939207	1.40399	13.1178	0.542044	7.61429	3.61802	32.376	6.63951
Z023E0107	0.940824	0.94558	1.34524	18.5612	0.875738	7.92016	4.51497	35.1134	6.3501
Z023E0108	0.679293	0.649915	1.32688	8.3878	0.532733	5.96211	1.55727	19.118	5.43863
Z023E0109	0.771793	0.959807	1.37731	11.2773	0.680021	6.97295	1.83712	23.1944	5.94139
Z023E0110	1.13525	1.07918	1.74351	12.6632	0.926343	8.2934	2.73333	30.5808	6.34085
Z023E0111	1.06628	1.15537	1.80887	17.7629	0.702825	9.70498	NA	38.5257	6.86679
Z023E0112	1.55265	0.741745	1.04542	12.7993	0.676865	7.08558	2.1439	25.6084	5.94436
Z023E0113	0.859764	0.934805	1.26889	11.1586	0.394542	7.21389	1.71706	24.7455	4.80761
Z023E0114	1.39768	1.52017	1.99996	17.408	1.53371	11.2489	3.79097	41.8528	4.86714
Z023E0115	0.936492	1.56649	1.48576	16.3866	1.09092	6.91665	1.95928	35.5617	6.15577
Z023E0116	2.03395	1.17556	1.23136	13.6947	0.513658	8.21341	3.55752	28.6868	6.18585
Z023E0117	1.80401	0.673602	1.61687	13.0827	1.0281	8.94275	3.09657	31.3451	4.85621
Z023E0118	0.792287	0.928297	1.04916	10.1348	0.643934	4.71424	2.05083	23.0296	4.94169
Z023E0119	0.678628	0.827312	1.61294	14.8624	1.31429	11.0855	1.44283	22.9724	6.94821
Z023E0120	1.81093	1.27256	0.74967	10.2388	0.178942	6.92686	2.25217	23.424	4.86224
Z023E0122	1.85864	0.922524	1.12304	15.1753	0.767642	9.72692	1.6508	30.6351	6.93239
Z023E0123	0.908193	0.804122	1.17191	14.1759	1.0574	5.45605	2.27249	26.096	6.36515
Z023E0124	1.5485	0.524156	0.883989	13.5571	0.538788	4.78955	1.73971	23.4648	3.87827
Z023E0125	1.86659	NA	2.77308	12.4645	1.296	11.839	NA	39.0735	6.3781
Z023E0126	1.29258	1.04581	2.00152	15.4205	0.785964	7.574	2.25559	31.8395	6.93791
Z023E0127	1.55464	1.36157	1.14541	14.2978	0.946712	8.62164	2.04108	29.5087	5.48363
Z023E0128	1.09792	0.675139	1.26225	12.2252	0.505658	5.65737	1.93867	22.7725	6.94186
Z023E0129	1.33879	1.3504	0.539108	12.2442	0.7254	7.36665	1.8082	26.3739	5.66749
Z023E0130	0.662261	0.504837	1.13254	9.06568	0.314479	4.13704	2.58153	18.0841	5.23473
Z023E0131	1.98988	0.902379	1.97307	10.2459	1.3234	6.45893	1.34137	25.836	5.10813
Z023E0133	1.54994	1.94557	1.44471	10.7618	0.515922	8.19463	2.36654	27.1177	4.82694
Z023E0134	1.55529	1.29842	1.38996	13.6394	0.886424	10.4712	2.22636	30.6297	5.35542
Z023E0135	1.15016	0.554626	0.82388	10.2049	1.04576	6.0005	1.27907	20.4869	4.44021
Z023E0136	1.63212	1.05736	1.13182	16.2529	1.42107	9.90153	3.67899	33.4214	5.938
Z023E0137	1.48063	1.06703	1.05284	8.313	0.819484	4.2417	1.48156	21.8869	4.94002
Z023E0138	1.16445	0.536899	0.936111	14.2031	0.190051	8.66131	1.64328	27.5312	4.84698
Z023E0139	0.987903	0.885755	1.14022	15.2446	0.558261	7.02604	2.39672	34.0299	5.93241
Z023E0140	0.76816	0.647481	0.69311	11.2447	0.417268	6.52717	0.711583	21.8032	4.95242
Z023E0141	0.94978	0.554623	1.28462	17.7135	0.907953	13.4769	2.00731	37.1832	4.90611
Z023E0142	0.94731	0.521467	1.45609	11.2343	0.401206	6.69949	2.19851	23.5216	5.36267
Z023E0143	1.01058	1.43576	1.4106	16.5359	0.981637	11.453	2.98906	36.9386	6.35541
Z023E0144	1.99289	0.998603	1.74016	18.4968	1.66892	8.99761	4.23796	39.0767	6.16651
Z023E0145	1.16454	0.672224	0.905158	13.4936	0.415162	7.14568	1.58657	24.3	4.9503
Z023E0146	1.50316	1.21377	1.7739	12.9081	1.1492	8.49076	2.57236	29.1312	6.16966
Z023E0147	0.765549	0.847388	0.834406	9.63555	0.38057	6.19384	0.8312	20.7565	5.32547
Z023E0148	0.663461	0.933901	1.45153	12.4876	0.508536	8.38424	2.21762	26.7425	6.40751
Z023E0149	1.71969	0.745278	1.7873	16.818	0.813996	10.5547	4.48732	38.624	7.32237
Z023E0150	0.788227	1.76081	1.99202	28.4365	0.690786	13.6563	5.08736	56.5775	6.16091
Z023E0151	1.86023	1.49203	1.73067	19.336	1.77247	11.1506	5.2202	42.7276	6.34649
Z023E0152	1.54485	0.579708	1.96135	17.2849	2.10289	11.2526	4.16228	37.7708	6.17728
Z023E0153	1.34774	1.53958	1.50175	15.2343	1.34807	9.04327	3.98742	33.4411	6.40214
Z023E0154	0.888743	0.603227	1.62851	12.457	0.234967	11.4742	3.01191	30.8377	6.68273
Z023E0155	1.2381	1.03621	1.34452	14.0041	0.27282	8.07864	2.58234	27.75	4.70861
Z023E0156	2.24674	1.02626	1.29279	14.0579	0.578896	8.82404	2.52843	30.3659	5.67928
Z023E0157	1.32412	0.40672	1.26179	15.1968	0.394842	5.58912	3.38961	26.7367	5.40507
Z023E0158	0.961095	0.688545	1.34319	12.5616	0.550381	5.05853	2.64588	25.5159	5.93949
Z023E0160	1.5169	1.11924	1.61354	12.6873	0.548957	6.96614	2.37066	30.2599	5.36418
Z023E0161	0.721184	0.650435	1.95264	15.4127	1.36388	6.11533	NA	30.7565	7.8396
Z023E0162	1.08943	0.877301	1.55149	12.151	0.214297	10.2432	2.2169	28.7316	5.46555
Z023E0164	0.956491	1.00768	2.59861	21.3659	0.89459	13.8688	1.30219	41.882	5.55998
Z023E0165	0.733105	0.510486	2.10933	11.156	0.839069	6.64938	4.21921	28.7423	6.94543
Z023E0166	0.807702	1.47387	1.86287	19.2164	0.152035	13.4585	3.06361	41.7939	7.41217
Z023E0169	0.966787	0.74408	1.27398	21.0166	0.91348	10.4751	3.92211	39.3871	6.16952
Z023E0170	1.47568	0.770271	0.808296	10.345	0.71204	5.65909	1.42629	21.9899	4.9146
Z023E0171	0.816213	0.954904	1.16539	13.6347	0.240929	6.08039	2.09629	26.567	6.97118
Z023E0172	0.710901	0.700461	1.22239	9.90194	0.576106	5.57375	1.50345	20.277	5.94129
Z023E0173	1.2012	0.87032	1.28018	18.9572	0.675551	8.96894	3.24799	37.3197	5.43855
Z023E0174	1.30332	1.18465	1.85024	16.7962	1.12995	12.594	1.43296	40.7513	6.16312
Z023E0175	0.875757	1.21214	1.81242	13.9566	0.72901	9.41626	2.93231	32.9317	6.33317
Z023E0177	1.12729	1.84506	1.74023	14.1903	0.366446	9.42004	1.75045	31.4507	6.35278
Z023E0178	0.736169	0.74562	0.692217	8.42604	0.282419	5.79781	0.372764	16.8483	4.91086
Z023E0179	1.11369	0.910123	1.60798	21.4819	0.849525	14.0202	2.63735	39.6064	4.8941
Z023E0180	0.77782	0.972111	1.2831	15.304	0.634514	7.93075	2.34986	32.0407	6.93577
Z023E0181	0.985381	1.01425	1.01296	11.5468	0.654249	6.77671	1.63805	26.0235	4.90784
Z023E0182	1.46943	1.22309	1.67118	13.5144	2.00485	8.81573	3.60872	31.0983	6.60055
Z023E0184	0.84533	0.963801	1.37136	10.9716	0.268599	5.82166	2.0501	23.0251	5.736
Z023E0186	1.15133	0.984491	1.98628	16.4893	0.784948	9.64735	4.87914	36.2702	5.5367
Z023E0187	0.882156	0.553358	1.39469	11.7405	0.483197	4.87325	0.851918	23.9665	4.68005
Z023E0188	1.6995	0.864955	1.0112	16.4822	0.0218763	7.54103	2.67902	30.5775	5.85011
Z023E0189	0.692521	0.514516	1.60567	7.9115	0.576097	5.83695	2.669	18.3349	5.13812
Z023E0190	1.60973	1.671	1.75876	13.3138	0.727573	8.75443	3.92833	31.662	6.85575
Z023E0191	1.27121	0.594477	1.4497	13.7552	0.423496	6.63081	3.17823	27.7149	6.60672
Z023E0192	0.705955	0.714716	1.4194	9.01993	0.830617	9.64797	1.83671	22.3442	6.34117
Z023E0194	1.50204	0.935339	1.41538	21.4587	1.04854	8.14805	4.73218	38.8703	6.67395
Z023E0195	1.22499	0.76127	0.955221	10.8782	0.661235	5.92582	1.72841	22.9231	5.29386
Z023E0196	0.743687	0.884819	2.05928	6.26451	1.0203	5.91041	2.90364	18.7571	4.86982
Z023E0197	0.92709	0.861624	1.17043	9.53261	0.741856	6.18445	1.74887	22.1269	5.27517
Z023E0198	1.16399	0.863345	2.54777	10.8981	0.765838	7.90398	1.4957	27.8003	6.15686
Z023E0199	1.15604	1.06269	1.8239	10.0314	0.497337	8.97521	1.92699	24.4323	5.88195
Z023E0200	0.978383	0.947397	0.776114	10.3284	0.398275	6.11356	1.2698	21.4713	5.92023
Z023E0217	2.3383	1.04858	1.71821	16.8825	0.951712	10.4695	2.74622	34.2404	6.94143
Z023E0225	1.31758	0.782474	1.0573	13.9354	1.46243	7.56919	2.00627	28.3955	5.93957
Z023E0231	1.45729	1.1856	1.37127	11.2859	0.714498	7.60427	3.17033	27.3117	7.31815
Z025E0001	1.57248	2.48684	1.77657	7.70248	0.93364	5.61511	1.73295	23.3445	5.13234
Z025E0002	1.67153	0.6942	1.15174	12.7869	0.435467	7.36592	2.49613	27.8361	5.47446
Z025E0003	1.3944	1.67721	0.963599	12.7726	0.228588	5.29669	0.963019	26.2956	5.14421
Z025E0004	1.92854	1.14541	1.47547	14.2772	0.448916	7.51883	4.95462	31.8078	6.008
Z025E0005	1.06241	2.07206	1.6145	16.98	0.668662	8.52086	4.89274	37.3647	6.05169
Z025E0006	1.22629	1.40189	1.00878	9.91785	0.252003	4.17541	1.87962	20.8519	2.54683
Z025E0007	1.12299	0.79348	0.633847	8.63629	0.495807	2.42658	1.59009	16.451	3.93566
Z025E0008	1.0064	1.07216	1.47763	17.3081	1.02617	7.59804	4.16908	36.4819	5.94712
Z025E0010	1.03861	1.42906	0.736593	7.33028	0.331499	2.98156	1.1677	16.1913	3.72707
Z025E0011	1.0771	1.03312	0.774072	9.49536	0.207999	4.99343	1.02289	19.0852	4.22436
Z025E0015	1.13468	0.702411	1.54085	14.2935	0.658094	6.55724	3.43916	29.6713	5.91809
Z025E0016	1.13434	1.73358	1.0877	11.3924	0.70372	4.30706	3.12434	25.6107	2.49943
Z025E0017	1.54681	1.35169	0.942671	13.5917	0.428037	4.23141	1.84642	25.7385	5.95398
Z025E0018	1.51888	0.61315	1.36359	13.1038	0.464849	6.3173	3.97986	30.0581	4.88669
Z025E0019	1.22487	1.84971	1.49087	19.2338	0.974868	5.88585	3.93168	36.2705	6.92838
Z025E0020	1.40641	1.09708	0.733232	14.3778	0.176186	4.11696	1.49143	25.1638	5.03371
Z025E0021	1.06072	1.52058	0.743654	9.26333	0.189171	4.33974	1.55338	18.4334	4.60366
Z025E0022	0.851327	0.64281	0.822072	9.0044	0.52729	4.07764	0.966295	18.4112	3.26356
Z025E0023	1.9568	2.54744	2.28384	10.257	1.04307	10.7243	NA	35.625	6.45277
Z025E0024	1.47414	0.95672	1.25124	12.8542	0.544062	3.69583	2.27254	23.6556	3.48173
Z025E0025	1.51755	1.625	0.671922	8.4324	0.127214	4.09802	1.14294	18.1658	3.46209
Z025E0026	1.473	2.3211	1.05826	12.1315	0.29972	5.11122	2.10056	25.3162	4.53342
Z025E0027	0.889939	1.01037	0.814506	8.70005	0.197295	4.03482	1.04123	18.4693	3.0272
Z025E0028	1.5285	1.69077	2.05738	10.8379	0.445772	4.92747	4.27378	28.1806	6.1521
Z025E0029	1.42099	1.30175	1.92031	15.6232	1.04083	10.765	9.21959	41.9663	6.95902
Z025E0030	1.76707	0.85225	1.87094	18.8857	0.731732	9.29445	6.95937	43.8823	6.6916
Z025E0032	0.742042	0.508983	0.983778	5.90332	1.02539	3.75097	0.742518	15.0639	2.64366
Z025E0033	0.989808	0.737825	1.05127	12.5612	0.616747	7.06861	3.32586	28.4047	4.91747
Z025E0034	1.2786	2.41842	1.00361	10.6061	0.198242	6.27688	2.01649	24.5858	4.76699
Z025E0035	1.83852	1.64388	2.76565	13.0278	0.81089	16.1742	2.37806	39.9339	6.48966
Z025E0036	1.1878	0.885113	1.48447	10.9043	0.220557	6.61524	1.78704	25.8059	5.72344
Z025E0037	0.886382	0.692334	1.44033	13.9705	0.392513	9.49861	2.0021	28.9745	6.21187
Z025E0038	0.842239	0.557964	0.695475	6.24772	0.163209	3.39332	0.598992	13.68	3.00409
Z025E0039	2.17865	0.626204	1.09458	14.4222	0.833525	5.96182	2.98656	29.0298	6.54361
Z025E0040	1.25391	0.70617	1.23153	15.5975	0.161891	6.1701	2.90959	28.5542	5.92302
Z025E0041	1.15477	0.412627	0.571178	10.7548	0.248508	4.13046	1.08341	19.399	3.27106
Z025E0043	0.533388	1.63624	1.25987	12.2391	0.281281	6.54849	2.79483	25.4329	5.43846
Z025E0044	1.24271	2.23244	1.62209	11.8041	0.576379	6.20134	3.34713	29.5997	4.5642
Z025E0045	1.17173	1.40031	0.858118	9.30768	0.245108	5.129	0.974503	19.833	4.84031
Z025E0046	0.844386	0.606885	0.881826	9.9202	0.189474	6.92088	1.14621	21.5526	4.6224
Z025E0047	1.23943	1.12466	2.3398	11.4687	1.09361	10.7816	2.11624	31.4496	5.92563
Z025E0048	0.776899	1.3413	0.765429	7.62978	0.208928	3.54166	1.32923	15.6826	5.03746
Z025E0049	0.75177	0.620888	1.20427	13.3151	0.303367	8.45788	2.62657	28.2811	3.72917
Z025E0050	1.24844	0.661365	0.584449	15.86	0.621428	5.39937	2.897	28.1851	5.59428
Z025E0051	1.04872	1.19536	1.51458	12.9331	0.61297	7.09949	2.65949	29.3931	5.62692
Z025E0052	1.41173	1.74729	2.07021	16.4216	0.807737	10.4855	NA	40.2151	5.46151
Z025E0053	1.55015	1.31228	2.353	16.2672	0.882463	9.87257	5.56383	38.8129	6.63756
Z025E0054	1.69247	0.820616	1.5542	9.71183	0.895612	8.77445	3.59617	29.5221	6.05455
Z025E0055	2.43996	0.765848	1.43735	15.3912	1.10396	6.37783	4.93871	35.6034	6.73847
Z025E0056	1.93647	1.07928	1.35562	24.1339	1.31075	11.622	8.86604	49.229	7.24482
Z025E0057	1.60432	1.16279	1.34196	14.9016	1.10621	9.9649	5.33082	36.181	6.13213
Z025E0059	1.23134	1.23408	1.05396	11.903	0.436436	3.93101	2.90601	24.6016	3.41374
Z025E0060	0.889766	0.775899	1.06758	10.0596	0.257195	4.20036	3.38794	22.14	4.23568
Z025E0061	1.51771	1.8553	1.81905	14.8019	0.561432	6.38242	4.51177	33.3205	4.54145
Z025E0062	2.2239	1.14513	1.67233	16.3485	0.349038	7.91923	3.13433	35.3411	5.54137
Z025E0063	1.50935	3.03424	1.80785	14.8184	1.35382	7.74726	3.46808	37.5386	6.73099
Z025E0064	1.70808	0.975521	1.20195	13.6343	0.304797	7.60464	3.24479	30.6137	6.12168
Z025E0065	1.48824	1.34506	2.10142	12.6426	0.499213	9.5178	4.09054	32.5471	5.91165
Z025E0066	1.96458	2.0135	1.19626	21.5624	1.58303	6.58422	NA	43.4392	5.44985
Z025E0067	1.56224	1.70784	2.733	19.8781	0.69851	10.1003	6.30332	46.3465	4.00803
Z025E0068	1.0581	-0.0694973	0.878345	15.4853	0.306741	5.65795	2.68476	26.3117	4.54965
Z025E0069	1.13154	0.78665	2.52703	13.5418	0.845927	10.3679	4.77323	33.4178	5.50997
Z025E0070	0.926154	0.361955	0.509781	7.38205	0.229075	4.22368	1.34224	15.5584	3.50398
Z025E0073	2.07504	0.662167	0.909641	12.5335	1.32384	4.13902	3.27689	25.6303	4.39157
Z025E0074	1.50076	2.49815	1.5251	9.65498	0.995163	6.40708	4.04266	27.7355	6.52505
Z025E0075	1.60182	1.17643	1.67536	19.4005	0.793483	12.6161	NA	47.1218	7.48437
Z025E0076	1.00776	0.668692	2.12682	10.5229	0.346939	10.5301	3.20288	30.6892	5.50369
Z025E0077	1.7864	3.39981	1.59564	9.99221	0.752835	5.98073	5.96609	31.8905	6.52251
Z025E0078	1.40721	1.08969	1.51267	15.7388	1.10037	7.81579	NA	36.4202	3.49105
Z025E0079	1.74205	1.17893	0.878312	11.8495	0.338881	5.36971	1.73831	24.5176	4.59362
Z025E0080	1.40345	1.1626	0.864733	8.72252	0.423256	3.5179	2.83613	18.3324	5.03104
Z025E0081	1.56384	0.584838	1.54134	9.81228	0.657868	5.53708	1.83192	22.8968	4.41976
Z025E0082	1.35069	1.43683	1.7608	17.2518	0.894576	8.7593	3.36184	36.9598	6.77363
Z025E0083	1.5758	1.25715	1.73953	16.2289	0.521454	8.1651	2.79119	35.2483	5.15865
Z025E0085	1.66142	1.59485	1.08759	11.5607	0.642243	5.33435	4.93297	29.5302	4.54189
Z025E0086	0.887223	0.894134	1.43913	16.3537	0.856499	8.26295	3.02271	33.4341	6.50476
Z025E0087	1.08754	1.14361	2.04854	10.2469	0.373743	8.64361	2.08395	27.9434	5.49886
Z025E0088	1.38121	0.485167	1.37751	18.3209	0.787029	7.92172	7.15062	39.532	7.2368
Z025E0089	0.575674	0.554634	0.563699	7.04627	0.228468	6.13233	0.841319	15.7841	2.94226
Z025E0090	2.3152	1.81938	1.14735	15.6268	0.824763	5.63477	3.62015	31.9153	3.5144
Z025E0091	0.570434	0.372056	0.617981	7.25944	0.296898	4.01266	0.928484	14.6619	3.95904
Z025E0092	1.55149	0.515407	0.668637	11.5618	0.246345	4.70865	1.56249	21.9978	4.48355
Z025E0093	2.23218	1.20738	2.03283	19.3326	1.08109	7.13162	8.49823	42.9117	6.49663
Z025E0094	0.87803	1.14094	0.618917	7.51187	0.769947	2.45409	1.06664	17.1253	3.58532
Z025E0095	1.37682	1.6596	1.24988	12.1498	0.26709	4.83747	3.26118	25.0909	4.43461
Z025E0096	0.838517	0.76483	1.2514	8.84652	0.624449	7.72742	1.50582	22.7883	4.20045
Z025E0098	0.872982	1.04491	1.60535	10.386	0.384784	7.98521	2.64115	26.0665	4.49969
Z025E0099	1.22946	0.537908	1.16008	11.3704	0.51091	4.89897	3.51474	23.4061	5.4762
Z025E0100	0.991934	0.714447	1.39964	12.4747	0.432109	6.86646	4.2198	28.3524	4.68745
Z025E0101	1.51024	0.850766	0.900348	10.9411	0.195895	7.36222	2.04275	23.4232	5.13908
Z025E0102	1.04574	1.2741	4.83505	16.6786	1.56378	17.1731	7.04351	53.5622	6.50275
Z025E0103	1.6948	1.44468	2.19692	13.7409	0.9263	10.166	3.77195	35.5605	5.53467
Z025E0104	1.502	1.11739	0.650291	13.0492	0.140321	4.22083	3.11097	25.0302	5.25268
Z025E0105	1.77235	1.20636	1.34606	13.1223	0.506324	7.54603	3.42165	29.0622	4.516
Z025E0106	1.25653	0.860264	1.53203	16.4262	0.523767	7.65218	3.36655	33.4272	6.24958
Z025E0107	1.85702	1.04234	1.02274	15.3062	1.23541	9.23926	5.42806	35.9748	6.4456
Z025E0108	1.7983	2.3212	1.34853	14.3914	0.506493	5.93515	4.86614	31.7825	6.69187
Z025E0109	0.889987	1.06302	1.18508	9.23545	0.58302	6.7043	1.39744	22.4628	4.61931
Z025E0110	1.22798	1.76275	1.14246	14.5446	0.345498	5.45914	3.90653	30.4156	6.20683
Z025E0111	1.1345	0.897852	0.739669	11.6321	0.287283	4.54663	1.40297	21.772	4.47575
Z025E0112	1.10017	0.425935	0.851672	11.7586	0.497743	5.84055	1.70474	23.5346	4.46909
Z025E0113	1.48358	0.830476	1.59279	12.1696	0.453381	10.8515	3.83212	33.1512	6.09415
Z025E0114	1.38481	2.75194	0.576234	14.9932	0.369282	3.74015	1.80599	26.8991	3.79927
Z025E0115	1.10963	1.86614	1.29347	13.712	0.57037	5.49246	4.25319	30.6637	5.65864
Z025E0116	1.2653	1.29462	1.75835	11.704	0.35806	6.41293	1.6007	25.1726	4.93195
Z025E0117	1.28871	1.09965	0.872531	10.5606	0.214989	5.53687	3.30791	24.3514	4.94647
Z025E0118	1.54328	1.32359	1.24339	12.2651	0.288459	5.29919	3.7824	26.7458	5.5101
Z025E0119	1.28756	1.20841	0.897693	13.6617	0.310711	5.12488	1.46401	23.9758	4.81832
Z025E0120	0.982736	1.21089	0.965006	9.0334	0.206599	4.29233	1.97505	20.3705	4.0204
Z025E0121	2.00832	1.88929	1.04565	9.33342	0.166259	3.99935	0.968064	18.3742	4.51491
Z025E0122	1.27947	0.587632	1.0373	15.8073	0.347248	7.26708	3.31389	32.0389	5.92002
Z025E0123	1.38813	0.574288	0.964462	14.403	0.282281	6.89522	4.11702	30.8875	4.58335
Z025E0124	1.95975	2.43025	0.955215	14.4431	0.638707	4.8928	4.22133	31.924	5.77455
Z025E0126	0.968675	0.785076	1.61767	14.6361	0.295601	8.45343	2.60788	30.776	5.15539
Z025E0128	1.14928	0.717156	1.44372	15.2379	0.314512	6.62545	2.32487	31.9106	4.00624
Z025E0129	0.98206	1.05955	1.19814	9.72982	0.185908	4.51364	2.62891	20.8976	4.20712
Z025E0130	1.65909	1.50611	1.93127	14.373	0.326849	8.25886	3.99403	32.8327	5.06683
Z025E0131	2.20683	1.13374	0.696867	9.72444	0.347211	4.45645	1.83725	24.1897	3.76603
Z025E0132	0.423696	1.05263	0.380082	8.95404	0.249805	4.17071	1.83783	17.2832	2.9503
Z025E0133	1.57192	2.05018	0.85849	11.3113	0.658769	4.3499	2.69739	23.1002	4.38196
Z025E0135	0.986525	2.13113	1.78818	13.6294	1.70225	5.46991	4.96005	33.499	4.47631
Z025E0136	1.75748	0.648881	0.997157	15.3638	0.535927	7.43513	3.84572	30.5597	5.16509
Z025E0137	1.5601	0.776655	1.13839	16.1447	1.27643	6.03929	2.57214	29.6377	4.49425
Z025E0138	1.07105	1.69669	1.18243	13.7606	0.816314	6.35145	4.50593	29.8928	5.51059
Z025E0139	1.28036	1.00558	2.73422	15.1667	0.484528	9.63621	6.86624	41.4406	5.63541
Z025E0140	1.96943	0.928779	1.60387	17.3282	0.439577	7.37972	NA	37.5559	5.48455
Z025E0141	1.61831	1.41023	1.12303	11.4268	0.205493	5.75985	1.56884	23.5979	5.74246
Z025E0142	0.831131	0.50585	0.562668	5.55694	0.2914	4.70948	0.768087	14.4099	3.88843
Z025E0143	1.39575	-0.0105816	0.71363	17.4703	0.036502	4.58737	1.71427	27.105	5.00793
Z025E0144	1.27783	0.99484	2.28912	12.0788	0.680283	12.066	3.775	36.9772	5.49579
Z025E0145	1.0531	0.915151	0.636101	12.0634	0.278266	4.0127	1.2899	20.2382	3.80122
Z025E0147	1.47708	2.07482	0.996024	11.5915	0.367736	3.97408	2.64531	26.3005	5.47286
Z025E0148	1.17001	2.16666	1.17583	11.4152	0.439222	5.29357	2.89359	25.5132	4.91863
Z025E0149	0.810338	0.78993	1.59201	17.6358	0.201154	10.2139	2.84452	34.6977	7.0748
Z025E0150	2.43339	1.20676	1.72905	13.4936	0.726121	5.41736	2.95364	34.3841	6.02508
Z025E0152	1.4158	2.33028	1.09301	13.2534	0.508315	5.5168	4.06764	27.9314	6.68971
Z025E0153	3.26199	0.945146	1.27899	16.2009	0.483947	5.57257	5.55498	34.5623	6.17514
Z025E0154	1.33923	0.82878	0.872529	11.5126	0.84118	6.01244	2.03818	24.3384	4.24851
Z025E0155	0.97775	0.899932	0.719845	7.96821	0.223266	4.53015	0.828805	18.2435	3.79673
Z025E0156	1.78458	1.29155	1.88942	21.8863	0.681731	8.32436	NA	43.6872	7.55267
Z025E0157	1.23019	1.00345	1.18562	13.2381	0.391836	9.89689	2.7882	30.2556	4.92329
Z025E0158	1.81409	0.828379	1.05462	11.5222	1.34683	5.89346	3.09576	28.4206	4.49207
Z025E0159	1.20709	0.906955	2.08205	22.039	0.709777	11.1313	7.60368	46.5534	6.89296
Z025E0160	1.28325	1.07302	0.617104	10.7021	0.590348	3.4912	1.86399	21.4014	4.51791
Z025E0161	1.58383	1.65661	2.30095	14.0328	1.19369	9.18564	5.77937	36.2166	6.16785
Z025E0162	1.7212	2.10117	1.33265	12.9166	0.952045	5.45948	4.08394	29.785	4.51173
Z025E0163	2.08106	2.77548	1.00305	11.2554	0.594977	5.80156	5.01759	29.0171	6.50268
Z025E0164	1.01065	1.35879	1.06966	10.1375	0.589634	4.72501	2.16666	22.9437	4.78563
Z025E0165	0.848007	1.45902	1.70384	11.5453	1.08582	8.40557	3.6498	29.3878	4.51264
Z025E0166	1.78069	0.867789	1.36102	9.18408	0.915723	4.0512	1.52705	22.3021	3.9095
Z025E0167	1.94106	1.82824	2.54737	19.45	0.422609	10.3712	NA	47.9709	6.53491
Z025E0168	2.03738	3.45981	1.46894	10.9622	0.883387	4.88692	2.22335	27.1282	4.48974
Z025E0169	1.25647	1.63894	2.78604	9.88372	0.525557	12.9938	1.95005	30.4849	6.70915
Z025E0170	1.92194	1.56366	1.84769	12.7071	0.706493	10.0069	NA	41.7859	7.02051
Z025E0171	1.2659	0.975585	1.3583	16.9773	0.168581	7.99336	2.25542	33.8498	5.01291
Z025E0172	1.98973	1.89142	1.33691	14.1511	0.582705	5.45756	2.48604	30.9422	5.88234
Z025E0173	1.38496	1.29056	0.809542	13.4519	0.147736	3.63722	3.15426	24.8216	4.61858
Z025E0174	2.52836	3.02892	1.10983	22.6889	1.36819	3.8803	NA	41.7148	4.52643
Z025E0175	1.19911	0.901606	0.986488	11.9893	0.610122	4.70133	1.92698	23.457	5.13682
Z025E0176	1.75627	1.80989	1.54988	8.10661	2.23645	5.04853	4.23048	27.6241	6.07239
Z025E0177	1.83024	1.72783	0.85201	17.4921	0.832248	6.61687	3.04501	33.1322	NA
Z025E0178	1.11449	0.629368	1.16175	13.3594	0.461816	6.8399	2.01745	26.388	4.25157
Z025E0179	0.910331	0.994175	0.699221	7.713	0.352531	2.98455	1.10172	15.2601	2.4772
Z025E0180	1.41725	1.78466	1.39939	16.0358	0.616331	5.10542	3.60867	30.8762	5.74623
Z025E0181	1.89858	1.15624	1.96645	15.1549	0.69447	11.3707	3.49048	35.7029	6.50618
Z025E0182	1.14437	1.33779	3.23263	12.7257	1.18032	9.29438	4.89666	35.2392	6.0239
Z025E0183	1.59305	2.40484	1.3904	9.8524	0.897989	5.03781	3.55421	26.9688	4.49433
Z025E0184	1.32379	0.97767	1.22985	13.7052	0.490497	9.94243	1.76272	29.8497	5.24444
Z025E0185	0.95399	0.623779	1.80998	13.5663	0.424613	6.1775	4.44879	30.5472	4.85469
Z025E0186	1.05226	0.345877	1.14479	9.9244	0.190779	5.40372	1.57772	21.6402	6.2907
Z025E0187	1.6822	0.987799	1.1383	10.6489	0.749544	4.53976	3.59032	23.8914	4.91502
Z025E0188	1.41135	2.34046	1.321	12.4324	0.902452	6.13591	4.72757	29.7141	4.50662
Z025E0189	1.10184	0.907487	1.69324	11.0471	0.605613	7.57321	1.96761	25.989	4.44483
Z025E0190	NA	NA	1.14179	28.4491	0.751117	8.2142	NA	67.3701	5.51972
Z025E0191	1.53947	1.07932	1.29176	15.0454	0.839638	7.57195	3.77976	37.5159	5.23311
Z025E0192	1.38885	0.557352	2.89981	9.94998	0.791798	13.2183	2.6886	32.6682	NA
Z025E0194	2.05638	2.27672	1.17335	10.3514	0.355408	5.681	2.00678	24.6556	5.17766
Z025E0195	1.96861	1.04634	1.138	12.957	0.242627	6.24148	2.60763	28.5683	5.05983
Z025E0196	1.24752	1.39316	1.39526	10.6388	0.89022	3.23652	4.98314	24.8479	2.83609
Z025E0197	0.934288	1.99716	0.989669	8.93011	0.269	5.44982	1.57921	20.0411	3.02522
Z025E0198	0.995298	1.92742	1.14659	15.0488	0.200523	5.13774	4.27827	30.136	4.48381
Z025E0199	0.703127	1.85115	1.57232	10.3672	1.04368	6.609	3.78794	26.6331	4.44063
Z025E0200	0.773139	0.488696	0.69657	12.5235	0.346792	4.41853	1.5258	23.5882	4.029
Z025E0211	1.91992	1.51234	2.21981	18.0491	0.635016	11.4373	5.48335	41.9153	6.97068
Z025E0213	1.38383	1.92082	1.21093	11.682	0.979637	6.11953	3.71005	30.0573	6.59992
Z025E0218	1.4843	1.35018	1.77283	16.2479	0.346042	9.86982	3.8883	36.8801	6.9436
Z025E0226	1.10172	0.826853	1.21547	9.86103	0.40203	5.2553	3.42701	23.5097	4.31251
Z025E0238	1.28947	1.18532	0.916474	11.9907	0.210997	4.22417	1.63398	22.9599	5.03507
Z025E0245	0.721179	0.844715	1.03806	9.31197	0.462292	4.68989	2.11699	19.7045	4.47395
Z025E0246	1.76637	0.952362	1.2116	14.3873	0.483504	6.04741	2.01928	28.9916	5.15822
Z025E0250	1.11414	1.53869	1.06175	13.4695	0.504735	3.72137	2.85873	25.4507	3.99827
